# Supplementary material for: Impact and effect mechanisms of mass campaigns in resource-constrained health systems: quasi-experimental evidence from polio eradication in Nigeria
Source: HighWire-hosted journal article supplement (doi:10.1136/bmjgh-2020-004248), 2021-03-01
Supplement: bmjgh-2020-004248supp003_data_supplement.pdf [file bmjgh-2020-004248supp003_data_supplement.pdf]

Table 2: Model overview

|                                             |                         | Childhood vaccination<br>(Table 1) |                   | Pregnancy health service utilisation<br>(Table 2) |                   |                                             |                   | Child survival<br>(Table 3) |                   |
|---------------------------------------------|-------------------------|------------------------------------|-------------------|---------------------------------------------------|-------------------|---------------------------------------------|-------------------|-----------------------------|-------------------|
|                                             |                         | VAC                                |                   | MOT_ANC<br>MOT_TET                                |                   | MOT_DEL_home<br>MOT_DEL_priv<br>MOT_DEL_pub |                   | CHI_ALIVE                   |                   |
| Outcome variables:                          |                         |                                    |                   |                                                   |                   |                                             |                   |                             |                   |
| Functional form:                            |                         | Logistic regression                |                   | Linear regression                                 |                   | Logistic regression                         |                   | Logistic regression         |                   |
| Analysis:                                   |                         | Main results                       | Robustness checks | Main results                                      | Robustness checks | Main results                                | Robustness checks | Main results                | Robustness checks |
| Key independent variables                   | EXP_CHI                 | ■                                  | ■                 |                                                   |                   |                                             |                   |                             |                   |
|                                             | EXP_CHI_RI              | ■                                  | ■                 |                                                   |                   |                                             |                   |                             |                   |
|                                             | EXP_CHI_FU              | ■                                  | ■                 |                                                   |                   |                                             |                   |                             |                   |
|                                             | EXP_CHI_nod             |                                    |                   |                                                   |                   |                                             |                   | ■                           | ■                 |
|                                             | EXP_CHI_RI_nod          |                                    |                   |                                                   |                   |                                             |                   |                             |                   |
|                                             | EXP_CHI_FU_nod          |                                    |                   |                                                   |                   |                                             |                   |                             |                   |
|                                             | EXP_PREG                |                                    |                   | ■                                                 | ■                 | ■                                           | ■                 |                             |                   |
|                                             | EXP_PREG_nod            |                                    |                   |                                                   |                   |                                             |                   | ■                           | ■                 |
|                                             | EXP_TOT_nod             |                                    |                   |                                                   |                   |                                             |                   | ■                           | ■                 |
|                                             | EXPxYR                  | ■                                  | ■                 | ■                                                 | ■                 | ■                                           | ■                 |                             |                   |
|                                             | EXPxAGE                 | ■                                  | ■                 |                                                   |                   |                                             |                   |                             |                   |
|                                             | EXPxAGExYEAR            | ■                                  | ■                 |                                                   |                   |                                             |                   |                             |                   |
|                                             | Other control variables | CHI_AGE                            | ■                 | ■                                                 |                   |                                             |                   |                             | ■                 |
| CHI_AGE <sup>2</sup>                        |                         | ■                                  | ■                 |                                                   |                   |                                             |                   | ■                           | ■                 |
| CHI_ORD                                     |                         | ■                                  | ■                 |                                                   |                   |                                             |                   | ■                           | ■                 |
| CHI_SEX                                     |                         | ■                                  | ■                 |                                                   |                   |                                             |                   | ■                           | ■                 |
| MOT_ANC                                     |                         | ■                                  | ■                 |                                                   |                   | ■                                           | ■                 | ■                           | ■                 |
| MOT_AWE                                     |                         | ■                                  | ■                 | ■                                                 | ■                 | ■                                           | ■                 |                             |                   |
| MOT_AGE                                     |                         | ■                                  | ■                 | ■                                                 | ■                 | ■                                           | ■                 | ■                           | ■                 |
| MOT_EDM                                     |                         | ■                                  | ■                 |                                                   |                   |                                             |                   | ■                           | ■                 |
| MOT_EDF                                     |                         | ■                                  | ■                 |                                                   |                   |                                             |                   | ■                           | ■                 |
| HH_REL                                      |                         | ■                                  | ■                 |                                                   |                   |                                             |                   | ■                           | ■                 |
| HH_ETH                                      |                         | ■                                  | ■                 |                                                   |                   |                                             |                   | ■                           | ■                 |
| HH_SIZ                                      |                         | ■                                  | ■                 |                                                   |                   |                                             |                   | ■                           | ■                 |
| HH_WEA                                      |                         | ■                                  | ■                 |                                                   |                   |                                             |                   | ■                           | ■                 |
| INF_RUR                                     |                         | ■                                  | ■                 |                                                   |                   |                                             |                   | ■                           | ■                 |
| YEAR                                        |                         | ■                                  | ■                 |                                                   |                   |                                             |                   | ■                           | ■                 |
| LGA random effect                           |                         | ■                                  | ■                 | ■                                                 | ■                 | ■                                           | ■                 | ■                           | ■                 |
| State random effect                         |                         |                                    |                   |                                                   |                   |                                             |                   |                             |                   |
| Fixed effects                               |                         |                                    |                   |                                                   |                   |                                             |                   |                             |                   |
| Decomposition of SIAs                       |                         |                                    |                   |                                                   |                   |                                             |                   |                             |                   |
| Stratification by region                    |                         |                                    |                   |                                                   |                   |                                             |                   |                             |                   |
| Stratification by survey round              |                         |                                    |                   |                                                   |                   |                                             |                   |                             |                   |
| Exclusion of 2018 round                     |                         |                                    |                   |                                                   |                   |                                             |                   |                             |                   |
| Non-polio/mealses RI outcome                |                         |                                    |                   |                                                   |                   |                                             |                   |                             |                   |
| Alternative reporting<br>(health card only) |                         |                                    |                   |                                                   |                   |                                             |                   |                             |                   |
