# Supplementary material for: Impact and effect mechanisms of mass campaigns in resource-constrained health systems: quasi-experimental evidence from polio eradication in Nigeria
Source: HighWire-hosted journal article supplement (doi:10.1136/bmjgh-2020-004248), 2021-03-01
Supplement: bmjgh-2020-004248supp006_data_supplement.pdf [file bmjgh-2020-004248supp006_data_supplement.pdf]

**Table 5: Main results: Link between SIA exposure and child survival**

| <i>Dependent variable: Child survival</i>        | Exposure decomposition        | Total exposure                |
|--------------------------------------------------|-------------------------------|-------------------------------|
| EXP_PREG_nod<br>(date approximation)             | -0.012<br>[-0.034, 0.010]     |                               |
| EXP_CHI_nod<br>(date approximation)              | -0.019***<br>[-0.029, -0.009] |                               |
| EXP_TOT_nod (total exposure, date approximation) |                               | -0.018***<br>[-0.027, -0.009] |
| Level 1 Observations (child)                     | 52431                         | 52431                         |
| Level 2 Observations (LGA)                       | 689                           | 689                           |
| <i>Akaike Information Criterion</i>              | 23684.534                     | 23682.853                     |
| Prob. > $\chi^2$                                 | <0.001                        | <0.001                        |

95% confidence intervals in brackets

\* p &lt; 0.10, \*\* p &lt; 0.05, \*\*\* p &lt; 0.01

**Table 5a: Detailed results: Link between SIA exposure and child survival**

| Dependent variable: Child survival               | Main results                  |                               |                                 |
|--------------------------------------------------|-------------------------------|-------------------------------|---------------------------------|
|                                                  | Full model                    |                               | Year-Interaction                |
|                                                  | Exposure decomposition        | Total exposure                | Child survival (total exposure) |
| EXP_PREG_nod<br>(date approximation)             | -0.012<br>[-0.034, 0.010]     |                               |                                 |
| EXP_CHI_nod<br>(date approximation)              | -0.019***<br>[-0.029, -0.009] |                               |                                 |
| EXP_TOT_nod (total exposure, date approximation) |                               | -0.018***<br>[-0.027, -0.009] | -0.058<br>[-0.134, 0.019]       |
| EXPxYR<br>[yr = 2008]                            |                               |                               | 0.031<br>[-0.044, 0.107]        |
| EXPxYR<br>[yr = 2013]                            |                               |                               | 0.046<br>[-0.030, 0.121]        |
| EXPxYR<br>[yr = 2018]                            |                               |                               | 0.031<br>[-0.045, 0.106]        |
| CHI_AGE                                          | -0.005<br>[-0.014, 0.005]     | -0.005<br>[-0.014, 0.005]     | -0.002<br>[-0.012, 0.008]       |
| CHI_AGE2                                         | 0.000<br>[-0.000, 0.000]      | 0.000<br>[-0.000, 0.000]      | 0.000<br>[-0.000, 0.000]        |
| CHI_ORD                                          | -0.154***<br>[-0.176, -0.131] | -0.154***<br>[-0.176, -0.131] | -0.153***<br>[-0.176, -0.131]   |
| CHI_SEX                                          | 0.213***<br>[0.141, 0.285]    | 0.213***<br>[0.141, 0.285]    | 0.213***<br>[0.141, 0.285]      |
| MOT_ANC                                          | -0.001<br>[-0.011, 0.009]     | -0.001<br>[-0.011, 0.009]     | -0.001<br>[-0.011, 0.009]       |
| MOT_EDM                                          | 0.013<br>[-0.006, 0.032]      | 0.013<br>[-0.006, 0.032]      | 0.013<br>[-0.006, 0.032]        |
| MOT_EDF                                          | 0.028***<br>[0.011, 0.045]    | 0.028***<br>[0.011, 0.045]    | 0.028***<br>[0.010, 0.045]      |
| MOT_AGE                                          | 0.010**<br>[0.002, 0.018]     | 0.010**<br>[0.002, 0.018]     | 0.010**<br>[0.001, 0.018]       |
| HH_RUR                                           | -0.182***<br>[-0.284, -0.079] | -0.181***<br>[-0.284, -0.079] | -0.184***<br>[-0.286, -0.081]   |
| HH_REL (ref: Catholic): Other Christian          | -0.137<br>[-0.303, 0.028]     | -0.138<br>[-0.303, 0.028]     | -0.136<br>[-0.302, 0.029]       |
| HH_REL (ref: Catholic): Islam                    | -0.072<br>[-0.267, 0.123]     | -0.070<br>[-0.265, 0.124]     | -0.065<br>[-0.260, 0.130]       |
| HH_REL (ref: Catholic): Traditionalist           | -0.092<br>[-0.464, 0.280]     | -0.091<br>[-0.463, 0.281]     | -0.099<br>[-0.471, 0.273]       |
| HH_REL (ref: Catholic): Other                    | 0.584<br>[-0.590, 1.757]      | 0.581<br>[-0.592, 1.755]      | 0.558<br>[-0.616, 1.732]        |
| HH_ETH (ref: Ekoi): Fulani                       | -0.182<br>[-0.808, 0.444]     | -0.178<br>[-0.803, 0.448]     | -0.118<br>[-0.745, 0.510]       |
| HH_ETH (ref: Ekoi): Hausa                        | -0.502<br>[-1.120, 0.116]     | -0.497<br>[-1.114, 0.121]     | -0.436<br>[-1.056, 0.183]       |
| HH_ETH (ref: Ekoi): Ibibio                       | -0.457<br>[-1.138, 0.225]     | -0.458<br>[-1.140, 0.223]     | -0.422<br>[-1.104, 0.259]       |
| HH_ETH (ref: Ekoi): Igala                        | -0.390<br>[-1.102, 0.322]     | -0.389<br>[-1.101, 0.323]     | -0.357<br>[-1.070, 0.355]       |
| HH_ETH (ref: Ekoi): Igbo                         | -0.500<br>[-1.109, 0.109]     | -0.501<br>[-1.110, 0.108]     | -0.471<br>[-1.081, 0.139]       |
| HH_ETH (ref: Ekoi): Ijaw / Izon                  | -0.242<br>[-0.896, 0.413]     | -0.243<br>[-0.898, 0.412]     | -0.204<br>[-0.859, 0.451]       |
| HH_ETH (ref: Ekoi): Kanuri / Beriberi            | -0.269<br>[-0.928, 0.389]     | -0.264<br>[-0.922, 0.395]     | -0.189<br>[-0.850, 0.472]       |
| HH_ETH (ref: Ekoi): Tiv                          | -0.362<br>[-1.013, 0.290]     | -0.359<br>[-1.010, 0.293]     | -0.312<br>[-0.964, 0.341]       |
| HH_ETH (ref: Ekoi): Yoruba                       | -0.021<br>[-0.642, 0.601]     | -0.021<br>[-0.643, 0.600]     | 0.011<br>[-0.611, 0.633]        |
| HH_ETH (ref: Ekoi): Other                        | -0.354<br>[-0.959, 0.251]     | -0.351<br>[-0.956, 0.254]     | -0.298<br>[-0.905, 0.308]       |
| HH_SIZ                                           | 0.132***<br>[0.117, 0.146]    | 0.132***<br>[0.117, 0.146]    | 0.132***<br>[0.118, 0.146]      |
| HH_WEA                                           | 0.017*<br>[-0.003, 0.037]     | 0.017<br>[-0.003, 0.037]      | 0.016<br>[-0.004, 0.036]        |
| YEAR (ref: 2003): 2008                           | 0.330***<br>[0.136, 0.524]    | 0.334***<br>[0.141, 0.528]    | 0.208<br>[-0.263, 0.680]        |
| YEAR (ref: 2003): 2013                           | 0.489***<br>[0.290, 0.689]    | 0.493***<br>[0.295, 0.692]    | 0.161<br>[-0.308, 0.629]        |
| YEAR (ref: 2003): 2018                           | 0.302***<br>[0.110, 0.494]    | 0.309***<br>[0.119, 0.500]    | 0.164<br>[-0.304, 0.633]        |
| Constant                                         | 2.494***<br>[1.819, 3.169]    | 2.502***<br>[1.827, 3.177]    | 2.644***<br>[1.859, 3.428]      |
| Multilevel variance parameter: Level 1           | 0.041***<br>[0.014, 0.068]    | 0.041***<br>[0.014, 0.068]    | 0.040***<br>[0.013, 0.067]      |
| Level 1 Observations (child)                     | 52431                         | 52431                         | 52431                           |
| Level 2 Observations (LGA)                       | 689                           | 689                           | 689                             |
| Akaike Information Criterion                     | 23684.534                     | 23682.853                     | 23676.199                       |
| Prob. > $\chi^2$                                 | <0.001                        | <0.001                        | <0.001                          |

---

95% confidence intervals in brackets

\*  $p < 0.10$ , \*\*  $p < 0.05$ , \*\*\*  $p < 0.01$

**Table 5b: Robustness check (3-level models): Link between SIA exposure and child survival**

| Dependent variables: various indicators of maternal care and child survival (see right) | Main results                  |                               |                                 |
|-----------------------------------------------------------------------------------------|-------------------------------|-------------------------------|---------------------------------|
|                                                                                         | Full model                    |                               | Year-Interaction                |
|                                                                                         | Exposure decomposition        | Total exposure                | Child survival (total exposure) |
| EXP_PREG_nod (date approximation)                                                       | -0.013<br>[-0.035, 0.010]     |                               |                                 |
| EXP_CHI_nod (date approximation)                                                        | -0.020***<br>[-0.031, -0.010] |                               |                                 |
| EXP_TOT_nod (total exposure, date approximation)                                        |                               | -0.019***<br>[-0.029, -0.009] | -0.062<br>[-0.140, 0.015]       |
| EXPxYR [yr = 2008]                                                                      |                               |                               | 0.033<br>[-0.042, 0.109]        |
| EXPxYR [yr = 2013]                                                                      |                               |                               | 0.048<br>[-0.027, 0.124]        |
| EXPxYR [yr = 2018]                                                                      |                               |                               | 0.034<br>[-0.042, 0.110]        |
| CHI_AGE                                                                                 | -0.004<br>[-0.014, 0.006]     | -0.004<br>[-0.013, 0.006]     | -0.001<br>[-0.011, 0.009]       |
| CHI_AGE2                                                                                | 0.000<br>[-0.000, 0.000]      | 0.000<br>[-0.000, 0.000]      | 0.000<br>[-0.000, 0.000]        |
| CHI_ORD                                                                                 | -0.154***<br>[-0.177, -0.132] | -0.154***<br>[-0.177, -0.132] | -0.154***<br>[-0.176, -0.131]   |
| CHI_SEX                                                                                 | 0.212***<br>[0.140, 0.284]    | 0.212***<br>[0.140, 0.284]    | 0.212***<br>[0.140, 0.284]      |
| MOT_ANC                                                                                 | 0.000<br>[-0.010, 0.010]      | 0.000<br>[-0.010, 0.010]      | 0.000<br>[-0.010, 0.010]        |
| MOT_EDM                                                                                 | 0.014<br>[-0.005, 0.033]      | 0.014<br>[-0.005, 0.033]      | 0.014<br>[-0.005, 0.033]        |
| MOT_EDF                                                                                 | 0.029***<br>[0.012, 0.046]    | 0.029***<br>[0.012, 0.046]    | 0.029***<br>[0.012, 0.046]      |
| MOT_AGE                                                                                 | 0.010**<br>[0.002, 0.019]     | 0.010**<br>[0.002, 0.019]     | 0.010**<br>[0.002, 0.019]       |
| HH_RUR                                                                                  | -0.176***<br>[-0.279, -0.073] | -0.176***<br>[-0.279, -0.073] | -0.178***<br>[-0.281, -0.075]   |
| HH_REL (ref: Catholic): Other Christian                                                 | -0.128<br>[-0.296, 0.039]     | -0.129<br>[-0.296, 0.038]     | -0.127<br>[-0.295, 0.040]       |
| HH_REL (ref: Catholic): Islam                                                           | -0.089<br>[-0.288, 0.109]     | -0.088<br>[-0.286, 0.110]     | -0.083<br>[-0.282, 0.115]       |
| HH_REL (ref: Catholic): Traditionalist                                                  | -0.055<br>[-0.428, 0.319]     | -0.054<br>[-0.428, 0.320]     | -0.060<br>[-0.434, 0.314]       |
| HH_REL (ref: Catholic): Other                                                           | 0.639<br>[-0.535, 1.813]      | 0.636<br>[-0.538, 1.809]      | 0.613<br>[-0.561, 1.788]        |
| HH_ETH (ref: Ekoi): Fulani                                                              | -0.001<br>[-0.665, 0.663]     | 0.003<br>[-0.662, 0.667]      | 0.071<br>[-0.595, 0.737]        |
| HH_ETH (ref: Ekoi): Hausa                                                               | -0.349<br>[-1.006, 0.308]     | -0.345<br>[-1.002, 0.312]     | -0.276<br>[-0.935, 0.384]       |
| HH_ETH (ref: Ekoi): Ibibio                                                              | -0.347<br>[-1.064, 0.370]     | -0.349<br>[-1.066, 0.368]     | -0.304<br>[-1.022, 0.415]       |
| HH_ETH (ref: Ekoi): Igala                                                               | -0.203<br>[-0.969, 0.563]     | -0.202<br>[-0.968, 0.564]     | -0.153<br>[-0.921, 0.614]       |
| HH_ETH (ref: Ekoi): Igbo                                                                | -0.353<br>[-1.010, 0.305]     | -0.355<br>[-1.012, 0.303]     | -0.316<br>[-0.975, 0.342]       |
| HH_ETH (ref: Ekoi): Ijaw / Izon                                                         | -0.056<br>[-0.773, 0.660]     | -0.058<br>[-0.775, 0.658]     | -0.011<br>[-0.728, 0.707]       |
| HH_ETH (ref: Ekoi): Kanuri / Beriberi                                                   | -0.230<br>[-0.925, 0.464]     | -0.225<br>[-0.920, 0.469]     | -0.146<br>[-0.843, 0.551]       |
| HH_ETH (ref: Ekoi): Tiv                                                                 | -0.200<br>[-0.911, 0.511]     | -0.198<br>[-0.909, 0.513]     | -0.142<br>[-0.855, 0.571]       |
| HH_ETH (ref: Ekoi): Yoruba                                                              | 0.047<br>[-0.616, 0.709]      | 0.046<br>[-0.617, 0.709]      | 0.087<br>[-0.577, 0.751]        |
| HH_ETH (ref: Ekoi): Other                                                               | -0.217<br>[-0.861, 0.426]     | -0.215<br>[-0.859, 0.428]     | -0.153<br>[-0.798, 0.493]       |
| HH_SIZ                                                                                  | 0.132***<br>[0.118, 0.146]    | 0.132***<br>[0.118, 0.146]    | 0.133***<br>[0.118, 0.147]      |
| HH_WEA                                                                                  | 0.014<br>[-0.006, 0.035]      | 0.014<br>[-0.006, 0.034]      | 0.014<br>[-0.007, 0.034]        |
| YEAR (ref: 2003): 2008                                                                  | 0.326***<br>[0.133, 0.519]    | 0.331***<br>[0.139, 0.523]    | 0.204<br>[-0.266, 0.674]        |
| YEAR (ref: 2003): 2013                                                                  | 0.495***<br>[0.295, 0.694]    | 0.500***<br>[0.301, 0.699]    | 0.155<br>[-0.312, 0.623]        |
| YEAR (ref: 2003): 2018                                                                  | 0.297***<br>[0.106, 0.488]    | 0.305***<br>[0.115, 0.494]    | 0.142<br>[-0.326, 0.611]        |
| Constant                                                                                | 2.353***<br>[1.641, 3.065]    | 2.362***<br>[1.650, 3.074]    | 2.505***<br>[1.689, 3.322]      |
| Multilevel variance parameter: Level 1                                                  | 0.026**<br>[0.005, 0.047]     | 0.026**<br>[0.005, 0.047]     | 0.027**<br>[0.005, 0.048]       |
| Multilevel variance parameter: Level 2                                                  | 0.020*<br>[-0.004, 0.044]     | 0.020<br>[-0.004, 0.044]      | 0.019<br>[-0.005, 0.042]        |
| Level 1 Observations (child)                                                            | 52431                         | 52431                         | 52431                           |
| Level 2 Observations (LGA)                                                              | 761                           | 761                           | 761                             |
| Level 3 Observations (state)                                                            | 37                            | 37                            | 37                              |
| Akaike Information Criterion                                                            | 23665.091                     | 23663.461                     | 23656.424                       |
| Prob. > $\chi^2$                                                                        | <0.001                        | <0.001                        | <0.001                          |

95% confidence intervals in brackets

\* p &lt; 0.10, \*\* p &lt; 0.05, \*\*\* p &lt; 0.01
