# Supplementary material for: Impact and effect mechanisms of mass campaigns in resource-constrained health systems: quasi-experimental evidence from polio eradication in Nigeria
Source: HighWire-hosted journal article supplement (doi:10.1136/bmjgh-2020-004248), 2021-03-01
Supplement: bmjgh-2020-004248supp007_data_supplement.pdf [file bmjgh-2020-004248supp007_data_supplement.pdf]

**Table 6: Relationship between health system performance and SIA frequency across regions in survey sample.**

| Indicator                                           | Region        |            |            |            |             |            |
|-----------------------------------------------------|---------------|------------|------------|------------|-------------|------------|
|                                                     | North Central | North East | North West | South East | South South | South West |
| Average total number of SIAs at LGA level           | 75.81         | 100.17     | 113.94     | 47.07      | 47.38       | 50.61      |
| Full immunisation status (incl. polio) <sup>a</sup> | 21.9%         | 11.7%      | 8.3%       | 40.6%      | 31.5%       | 33.4%      |
| Child exposure to SIAs                              | 9.11          | 13.01      | 15.06      | 4.78       | 4.71        | 5.34       |
| Mother's exposure to SIAs in pregnancy              | 3.28          | 4.42       | 5.07       | 1.89       | 1.87        | 2.07       |
| Mother's average no. of ANC visits                  | 4.68          | 2.78       | 2.3        | 8.16       | 6.35        | 10.75      |
| Average place of delivery: home                     | 49.5%         | 80.1%      | 87.2%      | 17.8%      | 50.4%       | 23.2%      |
| Average place of delivery: private facility         | 16.5%         | 1.5%       | 1.5%       | 45.5%      | 15.6%       | 29.3%      |
| Average place of delivery: public facility          | 34.0%         | 18.4%      | 11.3%      | 36.8%      | 34.0%       | 47.4%      |
| Average survival of children under 5 years          | 91.8%         | 89.6%      | 87.4%      | 91.9%      | 93.1%       | 94.1%      |
| Mothers' average years of education                 | 3.05          | 1.49       | 1.16       | 4.57       | 4.42        | 4.25       |
| Average household wealth index                      | 3.88          | 2.54       | 2.93       | 4.96       | 4.75        | 5.1        |

*Notes.* Derived from DHS data. Unweighted statistics aggregated firstly at LGA and secondly at regional level, comprising full sample of children born between Oct 2000 and Dec 2017. ANC = antenatal care; DHS = Demographic and Health Survey; LGA = local government area; SIA = Supplementary Immunisation Activity.

<sup>a</sup> Full immunisation status for children aged between 10 and 60 months, including at least 1 dose of BCG, 3 doses of DPT, 1 dose of measles vaccine, and three doses of oral polio vaccine.

**Table 6a: Additional robustness checks: exclusion of 2018 survey round to compensate for mop-up variability**

| <i>Dependent variables: various indicators of routine immunisation, maternal care and child survival (see right)</i> | <b>Non-polio full immunisation status</b> |                              | <b>Delivery</b>              |                              |                              | <b>Antenatal care</b>        |                              | <b>Child survival</b>        |
|----------------------------------------------------------------------------------------------------------------------|-------------------------------------------|------------------------------|------------------------------|------------------------------|------------------------------|------------------------------|------------------------------|------------------------------|
|                                                                                                                      | Full model                                | Interaction model            | At home                      | At private facility          | At public facility           | No. of antenatal care        | No. of tetanus injections    | Total exposure               |
| EXP_CHI                                                                                                              | -0.030***<br>[-0.044,-0.016]              | 0.011<br>[-0.015,0.036]      |                              |                              |                              |                              |                              |                              |
| EXPxAGE                                                                                                              |                                           | -0.001***<br>[-0.001,-0.000] |                              |                              |                              |                              |                              |                              |
| EXP_PREG                                                                                                             |                                           |                              | 0.006<br>[-0.020,0.032]      | -0.057***<br>[-0.091,-0.024] | 0.004<br>[-0.020,0.029]      | -0.020<br>[-0.060,0.021]     | -0.003<br>[-0.014,0.007]     |                              |
| EXP_TOT_nod (total exposure, date approximation)                                                                     |                                           |                              |                              |                              |                              |                              |                              | -0.013**<br>[-0.024,-0.001]  |
| CHI_AGE                                                                                                              | 0.033***<br>[0.026,0.039]                 | 0.038***<br>[0.031,0.045]    |                              |                              |                              |                              |                              | -0.002<br>[-0.014,0.009]     |
| CHI_AGE2                                                                                                             |                                           |                              |                              |                              |                              |                              |                              | 0.000<br>[-0.000,0.000]      |
| CHI_ORD                                                                                                              | -0.060***<br>[-0.088,-0.033]              | -0.061***<br>[-0.088,-0.034] |                              |                              |                              |                              |                              | -0.143***<br>[-0.170,-0.116] |
| CHI_SEX                                                                                                              | -0.007<br>[-0.090,0.077]                  | -0.006<br>[-0.089,0.078]     |                              |                              |                              |                              |                              | 0.245***<br>[0.157,0.334]    |
| MOT_ANC                                                                                                              | 0.053***<br>[0.043,0.062]                 | 0.053***<br>[0.044,0.062]    | -0.133***<br>[-0.142,-0.125] | 0.056***<br>[0.047,0.064]    | 0.061***<br>[0.054,0.068]    |                              |                              | 0.002<br>[-0.010,0.013]      |
| MOT_EDM                                                                                                              | 0.069***<br>[0.049,0.089]                 | 0.069***<br>[0.049,0.089]    | -0.064***<br>[-0.081,-0.048] | 0.057***<br>[0.035,0.080]    | 0.053***<br>[0.038,0.069]    | 0.105***<br>[0.079,0.130]    | 0.031***<br>[0.024,0.038]    | 0.018<br>[-0.006,0.041]      |
| MOT_EDF                                                                                                              | 0.006<br>[-0.014,0.027]                   | 0.007<br>[-0.013,0.028]      | -0.028***<br>[-0.045,-0.012] | 0.036***<br>[0.012,0.059]    | 0.031***<br>[0.015,0.047]    | 0.090***<br>[0.068,0.112]    | 0.022***<br>[0.015,0.029]    | 0.024**<br>[0.002,0.045]     |
| MOT_AWE                                                                                                              | 2.955***<br>[2.821,3.089]                 | 2.964***<br>[2.829,3.098]    | -0.947***<br>[-1.029,-0.865] | 0.289***<br>[0.166,0.411]    | 1.021***<br>[0.936,1.106]    | 1.900***<br>[1.754,2.047]    | 0.631***<br>[0.584,0.677]    |                              |
| MOT_AGE                                                                                                              | 0.025***<br>[0.016,0.035]                 | 0.026***<br>[0.016,0.035]    | -0.002<br>[-0.007,0.004]     | 0.001<br>[-0.007,0.008]      | 0.002<br>[-0.003,0.007]      | 0.014***<br>[0.007,0.020]    | 0.002<br>[-0.000,0.004]      | 0.010**<br>[0.000,0.020]     |
| HH_RUR                                                                                                               | -0.074<br>[-0.191,0.044]                  | -0.076<br>[-0.194,0.042]     | 0.599***<br>[0.498,0.701]    | -0.402***<br>[-0.526,-0.278] | -0.364***<br>[-0.458,-0.270] | -0.568***<br>[-0.836,-0.301] | -0.168***<br>[-0.226,-0.111] | -0.266***<br>[-0.395,-0.137] |
| HH_REL (ref: Catholic): Other Christian                                                                              | -0.172**<br>[-0.329,-0.015]               | -0.172**<br>[-0.330,-0.015]  | 0.106<br>[-0.029,0.242]      | -0.042<br>[-0.180,0.096]     | -0.050<br>[-0.172,0.071]     | -0.102<br>[-0.348,0.144]     | -0.037<br>[-0.096,0.022]     | -0.050<br>[-0.245,0.144]     |
| HH_REL (ref: Catholic): Islam                                                                                        | -0.504***<br>[-0.695,-0.313]              | -0.522***<br>[-0.714,-0.330] | 0.205**<br>[0.040,0.369]     | -0.218**<br>[-0.397,-0.040]  | -0.035<br>[-0.184,0.113]     | -0.177<br>[-0.508,0.154]     | -0.109***<br>[-0.189,-0.029] | 0.025<br>[-0.204,0.254]      |
| HH_REL (ref: Catholic): Traditionalist                                                                               | -0.596***<br>[-1.025,-0.168]              | -0.600***<br>[-1.029,-0.171] | 1.053***<br>[0.680,1.426]    | -0.863***<br>[-1.347,-0.380] | -0.553***<br>[-0.936,-0.171] | -0.589**<br>[-1.087,-0.091]  | -0.360***<br>[-0.498,-0.221] | -0.069<br>[-0.457,0.318]     |
| HH_REL (ref: Catholic): Other                                                                                        | -0.733<br>[-2.533,1.067]                  | -0.725<br>[-2.524,1.075]     | -0.555<br>[-1.634,0.523]     | 0.570<br>[-0.794,1.933]      | 0.388<br>[-0.744,1.520]      | 0.096<br>[-2.104,2.295]      | 0.022<br>[-0.697,0.741]      | -0.324<br>[-1.551,0.903]     |
| HH_ETH (ref: Ekoi): Fulani                                                                                           | -1.040***<br>[-1.596,-0.484]              | -1.092***<br>[-1.650,-0.535] | 0.671***<br>[0.201,1.141]    | -0.058<br>[-1.098,0.981]     | -0.744***<br>[-1.207,-0.280] | -0.764<br>[-2.268,0.740]     | -0.383***<br>[-0.655,-0.110] | -0.447<br>[-1.256,0.362]     |
| HH_ETH (ref: Ekoi): Hausa                                                                                            | -0.926***<br>[-1.459,-0.393]              | -1.012***<br>[-1.547,-0.477] | 0.936***<br>[0.481,1.391]    | -0.569<br>[-1.557,0.419]     | -0.806***<br>[-1.254,-0.357] | -0.504<br>[-2.005,0.996]     | -0.293**<br>[-0.563,-0.023]  | -0.832**<br>[-1.632,-0.032]  |
| HH_ETH (ref: Ekoi): Ibibio                                                                                           | -0.639**<br>[-1.224,-0.054]               | -0.643**<br>[-1.229,-0.057]  | 0.296<br>[-0.220,0.811]      | 0.750<br>[-0.270,1.771]      | -0.263<br>[-0.767,0.242]     | -0.026<br>[-1.484,1.433]     | -0.163<br>[-0.483,0.156]     | -0.777*<br>[-1.650,0.095]    |
| HH_ETH (ref: Ekoi): Igala                                                                                            | -0.699**<br>[-1.337,-0.061]               | -0.704**<br>[-1.342,-0.065]  | -0.532*<br>[-1.106,0.043]    | 1.440***<br>[0.423,2.456]    | 0.023<br>[-0.509,0.556]      | -0.135<br>[-1.689,1.418]     | 0.284*<br>[-0.046,0.615]     | -0.670<br>[-1.584,0.243]     |
| HH_ETH (ref: Ekoi): Igbo                                                                                             | -0.542**<br>[-1.050,-0.035]               | -0.546**<br>[-1.054,-0.037]  | -0.852***<br>[-1.301,-0.403] | 2.114***<br>[1.165,3.064]    | -0.601***<br>[-1.039,-0.162] | 1.096<br>[-0.409,2.602]      | 0.078<br>[-0.184,0.340]      | -0.917**<br>[-1.704,-0.130]  |
| HH_ETH (ref: Ekoi): Ijaw / Izon                                                                                      | -0.654**<br>[-1.242,-0.066]               | -0.651**<br>[-1.240,-0.061]  | 0.819***<br>[0.289,1.350]    | 0.238<br>[-0.817,1.292]      | -0.751***<br>[-1.271,-0.231] | -0.915<br>[-2.502,0.672]     | -0.150<br>[-0.444,0.145]     | -0.766*<br>[-1.592,0.059]    |
| HH_ETH (ref: Ekoi): Kanuri / Beriberi                                                                                | -1.146***<br>[-1.819,-0.474]              | -1.232***<br>[-1.906,-0.557] | 1.027***<br>[0.493,1.560]    | -0.564<br>[-1.886,0.759]     | -0.954***<br>[-1.477,-0.431] | -0.626<br>[-2.148,0.897]     | -0.286*<br>[-0.579,0.007]    | -0.628<br>[-1.471,0.215]     |
|                                                                                                                      | -0.721**<br>[-1.819,-0.474]               | -0.734**<br>[-1.906,-0.557]  | -0.803***<br>[0.493,1.560]   | 1.933***<br>[-1.886,0.759]   | 0.111<br>[-1.477,-0.431]     | -1.066<br>[-2.148,0.897]     | -0.392**<br>[-0.579,0.007]   | -0.883**<br>[-1.471,0.215]   |

|                                            |                 |                 |                 |                 |                 |                           |                           |                 |
|--------------------------------------------|-----------------|-----------------|-----------------|-----------------|-----------------|---------------------------|---------------------------|-----------------|
| HH_ETH (ref: Ekoi): Tiv                    | [-1.334,-0.108] | [-1.347,-0.120] | [-1.314,-0.292] | [0.928,2.937]   | [-0.398,0.621]  | [-2.636,0.504]            | [-0.696,-0.088]           | [-1.710,-0.056] |
|                                            | -0.650**        | -0.660**        | -0.172          | 1.441***        | -0.422*         | 2.185***                  | 0.061                     | -0.429          |
| HH_ETH (ref: Ekoi): Yoruba                 | [-1.168,-0.132] | [-1.179,-0.141] | [-0.628,0.283]  | [0.485,2.397]   | [-0.866,0.022]  | [0.668,3.702]             | [-0.204,0.327]            | [-1.231,0.372]  |
|                                            | -0.727***       | -0.759***       | 0.196           | 1.015**         | -0.322          | -0.039                    | -0.054                    | -0.723*         |
| HH_ETH (ref: Ekoi): Other                  | [-1.226,-0.228] | [-1.260,-0.259] | [-0.238,0.630]  | [0.066,1.963]   | [-0.750,0.105]  | [-1.520,1.442]            | [-0.317,0.209]            | [-1.506,0.060]  |
|                                            | -0.015**        | -0.015**        | 0.030***        | -0.013          | -0.019***       | -0.049***                 | -0.008***                 | 0.135***        |
| HH_SIZ                                     | [-0.029,-0.001] | [-0.029,-0.001] | [0.019,0.041]   | [-0.029,0.003]  | [-0.030,-0.009] | [-0.064,-0.035]           | [-0.013,-0.004]           | [0.117,0.153]   |
|                                            | 0.155***        | 0.156***        | -0.213***       | 0.116***        | 0.138***        | 0.318***                  | 0.066***                  | 0.012           |
| HH_WEA                                     | [0.133,0.178]   | [0.133,0.179]   | [-0.232,-0.194] | [0.092,0.140]   | [0.120,0.155]   | [0.282,0.353]             | [0.057,0.076]             | [-0.013,0.038]  |
|                                            | 0.667***        | 0.601***        | 0.001           | -0.246**        | 0.081           | -0.658***                 | -0.098**                  | 0.320***        |
| YEAR (ref: 2003): 2008                     | [0.402,0.932]   | [0.333,0.869]   | [-0.185,0.188]  | [-0.462,-0.031] | [-0.097,0.259]  | [-1.073,-0.242]           | [-0.184,-0.013]           | [0.123,0.517]   |
|                                            | 0.801***        | 0.720***        | -0.030          | -0.406***       | 0.146           | -0.338                    | -0.036                    | 0.464***        |
| YEAR (ref: 2003): 2013                     | [0.539,1.064]   | [0.453,0.986]   | [-0.216,0.156]  | [-0.618,-0.194] | [-0.030,0.322]  | [-0.769,0.094]            | [-0.123,0.052]            | [0.258,0.670]   |
|                                            | -4.617***       | -4.787***       | 2.050***        | -3.869***       | -2.399***       | 3.518***                  | 1.007***                  | 2.723***        |
| Constant                                   | [-5.246,-3.989] | [-5.423,-4.151] | [1.540,2.561]   | [-4.878,-2.861] | [-2.900,-1.897] | [1.918,5.118]             | [0.716,1.299]             | [1.871,3.576]   |
|                                            | 0.349***        | 0.348***        | 0.478***        | 0.789***        | 0.499***        | 0.793***                  | -1.384***                 | 0.041**         |
| Multilevel variance parameter:<br>Level 1  | [0.265,0.434]   | [0.264,0.432]   | [0.381,0.576]   | [0.603,0.975]   | [0.407,0.590]   | [0.696,0.890]             | [-1.483,-1.285]           | [0.007,0.075]   |
| Multilevel variance parameter:<br>Residual |                 |                 |                 |                 |                 | 1.333***<br>[1.291,1.376] | 0.092***<br>[0.064,0.121] |                 |
| Level 1 Observations (child)               | 20752           | 20752           | 29480           | 29480           | 29480           | 29691                     | 31177                     | 34500           |
| Level 2 Observations (LGA)                 | 572             | 572             | 574             | 574             | 574             | 574                       | 575                       | 576             |
| Akaike Information Criterion               | 14663.935       | 14651.865       | 21880.73        | 14443.993       | 24935.19        | 164998.875                | 94979.021                 | 15648.893       |
| Prob. > $\chi^2$                           | <0.001          | <0.001          | <0.001          | <0.001          | <0.001          | <0.001                    | <0.001                    | <0.001          |

95% confidence intervals in brackets

\* p &lt; 0.10, \*\* p &lt; 0.05, \*\*\* p &lt; 0.01

**Table 6b-1: Additional robustness checks: year-wise stratification to detect time trends - Polio**

| Dependent variable: non-polio full immunisation status | Full model                   |                              |                              |                              | Interaction model (EXPxAGE)   |                              |                              |                              |
|--------------------------------------------------------|------------------------------|------------------------------|------------------------------|------------------------------|-------------------------------|------------------------------|------------------------------|------------------------------|
|                                                        | 2003                         | 2008                         | 2013                         | 2018                         | 2003                          | 2008                         | 2013                         | 2018                         |
| EXP_CHI                                                | -0.040<br>[-0.289,0.209]     | -0.051***<br>[-0.079,-0.023] | -0.026***<br>[-0.043,-0.010] | -0.027<br>[-0.065,0.010]     | -0.086<br>[-1.046,0.874]      | -0.042<br>[-0.093,0.009]     | 0.027*<br>[-0.003,0.058]     | 0.111*<br>[-0.012,0.233]     |
| EXPxAGE                                                |                              |                              |                              |                              | 0.003<br>[-0.051,0.057]       | 0.000<br>[-0.001,0.001]      | -0.001***<br>[-0.002,-0.001] | -0.005**<br>[-0.009,-0.001]  |
| CHI_AGE                                                | 0.117**<br>[0.017,0.218]     | 0.035***<br>[0.025,0.046]    | 0.035***<br>[0.026,0.043]    | 0.036***<br>[0.016,0.056]    | 0.109<br>[-0.087,0.305]       | 0.036***<br>[0.024,0.049]    | 0.043***<br>[0.033,0.052]    | 0.042***<br>[0.021,0.062]    |
| CHI_ORD                                                | 0.018<br>[-0.153,0.188]      | -0.037*<br>[-0.080,0.007]    | -0.076***<br>[-0.113,-0.039] | -0.069**<br>[-0.129,-0.008]  | 0.018<br>[-0.153,0.188]       | -0.037*<br>[-0.081,0.006]    | -0.076***<br>[-0.113,-0.039] | -0.070**<br>[-0.131,-0.009]  |
| CHI_SEX                                                | 0.031<br>[-0.464,0.526]      | 0.010<br>[-0.126,0.145]      | -0.027<br>[-0.137,0.083]     | 0.030<br>[-0.146,0.206]      | 0.031<br>[-0.464,0.526]       | 0.010<br>[-0.126,0.145]      | -0.025<br>[-0.135,0.085]     | 0.029<br>[-0.147,0.205]      |
| MOT_ANC                                                | 0.095***<br>[0.045,0.144]    | 0.061***<br>[0.045,0.077]    | 0.044***<br>[0.032,0.056]    | 0.074***<br>[0.049,0.100]    | 0.094***<br>[0.044,0.144]     | 0.061***<br>[0.045,0.077]    | 0.045***<br>[0.032,0.057]    | 0.075***<br>[0.050,0.101]    |
| MOT_EDM                                                | 0.074<br>[-0.036,0.185]      | 0.064***<br>[0.031,0.096]    | 0.075***<br>[0.048,0.101]    | 0.041*<br>[-0.003,0.085]     | 0.074<br>[-0.036,0.185]       | 0.064***<br>[0.031,0.096]    | 0.076***<br>[0.049,0.103]    | 0.044*<br>[-0.000,0.088]     |
| MOT_EDF                                                | -0.035<br>[-0.159,0.088]     | 0.026<br>[-0.007,0.059]      | -0.009<br>[-0.037,0.018]     | 0.028<br>[-0.015,0.071]      | -0.035<br>[-0.159,0.088]      | 0.026<br>[-0.007,0.059]      | -0.007<br>[-0.035,0.020]     | 0.029<br>[-0.014,0.072]      |
| MOT_AWE                                                | 2.968***<br>[1.880,4.056]    | 2.453***<br>[2.255,2.650]    | 3.411***<br>[3.217,3.605]    | 3.131***<br>[2.779,3.484]    | 2.971***<br>[1.881,4.061]     | 2.455***<br>[2.257,2.652]    | 3.422***<br>[3.228,3.615]    | 3.132***<br>[2.779,3.484]    |
| MOT_AGE                                                | 0.012<br>[-0.046,0.070]      | 0.021***<br>[0.006,0.037]    | 0.027***<br>[0.014,0.040]    | 0.033***<br>[0.012,0.054]    | 0.012<br>[-0.046,0.070]       | 0.021***<br>[0.006,0.037]    | 0.027***<br>[0.015,0.040]    | 0.034***<br>[0.013,0.055]    |
| HH_RUR                                                 | -0.056<br>[-0.680,0.569]     | -0.031<br>[-0.244,0.181]     | -0.168**<br>[-0.321,-0.015]  | -0.232*<br>[-0.467,0.002]    | -0.054<br>[-0.680,0.571]      | -0.030<br>[-0.243,0.182]     | -0.176**<br>[-0.329,-0.022]  | -0.235**<br>[-0.469,-0.001]  |
| HH_REL (ref: Catholic): Other Christian                | -0.189<br>[-0.895,0.517]     | -0.269**<br>[-0.532,-0.007]  | -0.099<br>[-0.310,0.112]     | 0.011<br>[-0.320,0.342]      | -0.188<br>[-0.894,0.518]      | -0.270**<br>[-0.532,-0.007]  | -0.099<br>[-0.311,0.112]     | 0.018<br>[-0.313,0.349]      |
| HH_REL (ref: Catholic): Islam                          | -0.258<br>[-1.035,0.519]     | -0.540***<br>[-0.864,-0.216] | -0.474***<br>[-0.729,-0.218] | -0.432**<br>[-0.848,-0.015]  | -0.257<br>[-1.034,0.520]      | -0.543***<br>[-0.868,-0.219] | -0.504***<br>[-0.760,-0.248] | -0.438**<br>[-0.854,-0.022]  |
| HH_REL (ref: Catholic): Traditionalist                 | -0.325<br>[-2.215,1.565]     | -0.481<br>[-1.089,0.126]     | -0.757**<br>[-1.411,-0.104]  | -0.168<br>[-1.807,1.470]     | -0.322<br>[-2.212,1.568]      | -0.481<br>[-1.089,0.127]     | -0.774**<br>[-1.428,-0.119]  | -0.105<br>[-1.755,1.545]     |
| HH_REL (ref: Catholic): Other                          | 0.000<br>[0.000,0.000]       | -0.531<br>[-2.432,1.370]     | 0.000<br>[0.000,0.000]       | 0.162<br>[-1.319,1.642]      | 0.000<br>[0.000,0.000]        | -0.526<br>[-2.428,1.377]     | 0.000<br>[0.000,0.000]       | 0.191<br>[-1.290,1.671]      |
| HH_ETH (ref: Ekoi): Fulani                             | 0.000<br>[0.000,0.000]       | -1.277***<br>[-2.032,-0.522] | 0.058<br>[-1.523,1.640]      | -0.712<br>[-2.074,0.650]     | 0.000<br>[0.000,0.000]        | -1.289***<br>[-2.046,-0.531] | 0.034<br>[-1.549,1.617]      | -0.771<br>[-2.133,0.591]     |
| HH_ETH (ref: Ekoi): Hausa                              | -0.297<br>[-2.094,1.500]     | -1.227***<br>[-1.956,-0.498] | 0.249<br>[-1.314,1.812]      | -0.635<br>[-1.952,0.682]     | -0.287<br>[-2.098,1.524]      | -1.245***<br>[-1.978,-0.511] | 0.170<br>[-1.395,1.734]      | -0.691<br>[-2.008,0.626]     |
| HH_ETH (ref: Ekoi): Ibibio                             | 0.000<br>[0.000,0.000]       | -0.898**<br>[-1.695,-0.101]  | 0.426<br>[-1.174,2.027]      | -0.712<br>[-2.124,0.700]     | 0.000<br>[0.000,0.000]        | -0.899**<br>[-1.697,-0.101]  | 0.469<br>[-1.134,2.071]      | -0.721<br>[-2.133,0.690]     |
| HH_ETH (ref: Ekoi): Igala                              | -0.403<br>[-2.844,2.038]     | -1.279***<br>[-2.159,-0.399] | 0.926<br>[-0.719,2.571]      | -1.062<br>[-2.652,0.528]     | -0.399<br>[-2.844,2.046]      | -1.284***<br>[-2.165,-0.404] | 0.987<br>[-0.660,2.633]      | -1.073<br>[-2.664,0.519]     |
| HH_ETH (ref: Ekoi): Igbo                               | 0.510<br>[-1.416,2.435]      | -0.827**<br>[-1.481,-0.173]  | 0.569<br>[-0.981,2.120]      | -0.415<br>[-1.695,0.865]     | 0.512<br>[-1.418,2.442]       | -0.828**<br>[-1.482,-0.174]  | 0.611<br>[-0.941,2.164]      | -0.433<br>[-1.712,0.847]     |
| HH_ETH (ref: Ekoi): Ijaw / Izon                        | 0.219<br>[-2.879,3.317]      | -1.426***<br>[-2.240,-0.611] | 0.894<br>[-0.696,2.484]      | 0.126<br>[-1.326,1.578]      | 0.212<br>[-2.892,3.316]       | -1.425***<br>[-2.239,-0.610] | 0.943<br>[-0.649,2.535]      | 0.110<br>[-1.342,1.562]      |
| HH_ETH (ref: Ekoi): Kanuri / Beriberi                  | 0.000<br>[0.000,0.000]       | -1.606***<br>[-2.589,-0.624] | 0.072<br>[-1.584,1.727]      | -0.521<br>[-2.060,1.018]     | 0.000<br>[0.000,0.000]        | -1.622***<br>[-2.607,-0.636] | -0.019<br>[-1.677,1.640]     | -0.615<br>[-2.154,0.925]     |
| HH_ETH (ref: Ekoi): Tiv                                | 0.636<br>[-1.631,2.903]      | -0.966**<br>[-1.777,-0.155]  | 0.299<br>[-1.325,1.924]      | -0.453<br>[-1.861,0.955]     | 0.640<br>[-1.632,2.912]       | -0.972**<br>[-1.784,-0.161]  | 0.347<br>[-1.280,1.973]      | -0.511<br>[-1.920,0.897]     |
| HH_ETH (ref: Ekoi): Yoruba                             | 1.185<br>[-0.686,3.055]      | -0.572*<br>[-1.252,0.108]    | 0.193<br>[-1.360,1.746]      | -0.550<br>[-1.852,0.753]     | 1.185<br>[-0.689,3.060]       | -0.576*<br>[-1.256,0.105]    | 0.228<br>[-1.327,1.783]      | -0.566<br>[-1.868,0.736]     |
| HH_ETH (ref: Ekoi): Other                              | 0.094<br>[-1.703,1.892]      | -0.999***<br>[-1.651,-0.347] | 0.430<br>[-1.113,1.973]      | -0.390<br>[-1.670,0.890]     | 0.098<br>[-1.705,1.902]       | -1.008***<br>[-1.661,-0.354] | 0.438<br>[-1.107,1.982]      | -0.448<br>[-1.728,0.832]     |
| HH_SIZ                                                 | 0.005<br>[-0.080,0.090]      | -0.026**<br>[-0.049,-0.004]  | -0.009<br>[-0.027,0.010]     | -0.012<br>[-0.043,0.019]     | 0.005<br>[-0.080,0.090]       | -0.026**<br>[-0.049,-0.004]  | -0.008<br>[-0.027,0.011]     | -0.012<br>[-0.043,0.018]     |
| HH_WEA                                                 | 0.083<br>[-0.035,0.201]      | 0.170***<br>[0.130,0.209]    | 0.156***<br>[0.127,0.185]    | 0.099***<br>[0.056,0.142]    | 0.083<br>[-0.035,0.201]       | 0.170***<br>[0.131,0.209]    | 0.157***<br>[0.127,0.186]    | 0.101***<br>[0.058,0.145]    |
| Constant                                               | -7.031***<br>[-9.848,-4.214] | -3.237***<br>[-4.034,-2.439] | -5.320***<br>[-6.931,-3.709] | -4.308***<br>[-5.802,-2.814] | -6.896***<br>[-10.781,-3.011] | -3.286***<br>[-4.117,-2.454] | -5.704***<br>[-7.327,-4.081] | -4.474***<br>[-5.974,-2.973] |
| Multilevel variance parameter: Level 1                 | 0.000<br>[-0.000,0.000]      | 0.520***<br>[0.347,0.692]    | 0.295***<br>[0.198,0.392]    | 0.398***<br>[0.200,0.596]    | 0.000<br>[-0.000,0.000]       | 0.520***<br>[0.347,0.692]    | 0.292***<br>[0.196,0.389]    | 0.396***<br>[0.198,0.593]    |
| Level 1 Observations (child)                           | 648                          | 8163                         | 11924                        | 3629                         | 648                           | 8163                         | 11924                        | 3629                         |
| Level 2 Observations (LGA)                             | 138                          | 369                          | 370                          | 504                          | 138                           | 369                          | 370                          | 504                          |
| Akaike Information Criterion                           | 450.792                      | 5772.355                     | 8366.43                      | 3393.899                     | 452.782                       | 5774.188                     | 8351.201                     | 3390.504                     |
| Prob. > $\chi^2$                                       | <0.001                       | <0.001                       | <0.001                       | <0.001                       | <0.001                        | <0.001                       | <0.001                       | <0.001                       |

95% confidence intervals in brackets

\* p &lt; 0.10, \*\* p &lt; 0.05, \*\*\* p &lt; 0.01

**Table 6b-2: Additional robustness checks: year-wise stratification to detect time trends - delivery**

| Dependent variables: various indicators of delivery (see right) | At home   |           |           |           | At private facility |          |           |           | At public facility |          |           |          |
|-----------------------------------------------------------------|-----------|-----------|-----------|-----------|---------------------|----------|-----------|-----------|--------------------|----------|-----------|----------|
|                                                                 | 2003      | 2008      | 2013      | 2018      | 2003                | 2008     | 2013      | 2018      | 2003               | 2008     | 2013      | 2018     |
| EXP_PREG                                                        | 0.104     | 0.004     | 0.019     | 0.023     | -0.138              | -0.065** | -0.060*** | -0.108*** | 0.038              | 0.005    | -0.005    | 0.014    |
| MOT_ANC                                                         | -0.112*** | -0.155*** | -0.124*** | -0.179*** | 0.029*              | 0.083*** | 0.049***  | 0.069***  | 0.071***           | 0.070*** | 0.054***  | 0.071*** |
| MOT_EDM                                                         | -0.129*** | -0.056*** | -0.061*** | -0.085*** | 0.076*              | 0.057*** | 0.056***  | 0.047*    | 0.102***           | 0.041*** | 0.055***  | 0.088*** |
| MOT_EDF                                                         | -0.012    | -0.039*** | -0.023**  | -0.041**  | 0.029               | 0.027    | 0.046***  | 0.028     | 0.009              | 0.043*** | 0.024**   | 0.051*** |
| MOT_AWE                                                         | -0.746*** | -0.934*** | -0.982*** | -0.765*** | 0.229               | 0.327*** | 0.259**   | 0.238     | 0.848***           | 0.990*** | 1.075***  | 0.809*** |
| MOT_AGE                                                         | -0.013    | -0.001    | -0.001    | -0.006    | -0.005              | 0.002    | -0.001    | 0.002     | 0.018              | 0.000    | 0.003     | 0.005    |
| HH_RUR                                                          | 0.476**   | 0.641**   | 0.709**   | 0.450**   | -0.086              | -0.329** | -0.592**  | -0.431**  | -0.526**           | -0.436** | -0.356**  | -0.241** |
| HH_REL (ref: Catholic): Other Christian                         | -0.228    | 0.055     | 0.199**   | 0.176     | 0.514**             | 0.266**  | -0.283**  | -0.391**  | -0.370             | -0.278** | 0.090     | 0.203    |
| HH_REL (ref: Catholic): Islam                                   | 0.347     | -0.047    | 0.411**   | 0.416**   | 0.171               | 0.270*   | -0.558**  | -0.348*   | -0.467*            | -0.191   | 0.066     | -0.052   |
| HH_REL (ref: Catholic): Traditionalist                          | 2.659**   | 1.275**   | 0.673**   | 0.535     | 0.000               | -0.624*  | -0.779**  | -1.217    | -1.795             | -1.044** | -0.099    | 0.332    |
| HH_REL (ref: Catholic): Other                                   | 0.000     | -1.175    | 0.003     | -0.456    | 0.000               | 1.580**  | 0.000     | 0.000     | 0.000              | 0.330    | 0.489     | 1.074*   |
| HH_ETH (ref: Ekoi): Fulani                                      | 0.000     | 1.075**   | 0.369     | 0.357     | 0.000               | -0.040   | -0.898    | -0.153    | 0.000              | -1.106** | -0.403    | -0.625   |
| HH_ETH (ref: Ekoi): Hausa                                       | 0.924**   | 1.371**   | 0.590     | 0.759     | -1.297              | -1.110*  | -0.953    | -0.675    | -0.617             | -1.075** | -0.514    | -0.770   |
| HH_ETH (ref: Ekoi): Ibibio                                      | -0.948    | 0.178     | 0.484     | 0.610     | 0.744               | 0.846    | -0.114    | -0.010    | 1.351              | -0.198   | -0.248    | -0.492   |
| HH_ETH (ref: Ekoi): Igala                                       | -1.208    | -0.841*   | -0.481    | -0.705    | 1.997**             | 1.364**  | 0.878     | 1.585*    | 0.324              | 0.288    | -0.001    | -0.234   |
| HH_ETH (ref: Ekoi): Igbo                                        | -0.910*   | -1.046**  | -0.853    | -0.730    | 2.503**             | 2.415**  | 1.396     | 1.515*    | -0.728             | -0.660** | -0.459    | -0.554   |
| HH_ETH (ref: Ekoi): Ijaw / Izon                                 | 0.012     | 0.996**   | 0.881     | 1.401**   | 0.257               | 0.102    | -0.448    | -0.270    | 0.377              | -0.640   | -0.825    | -1.319** |
| HH_ETH (ref: Ekoi): Kanuri / Beriberi                           | 0.656     | 1.330**   | 0.663     | 0.511     | 0.000               | -0.880   | -0.741    | -0.448    | 0.131              | -1.285** | -0.555    | -0.644   |
| HH_ETH (ref: Ekoi): Tiv                                         | -1.588**  | -0.853**  | -0.951    | -1.013*   | 2.493**             | 2.198**  | 1.302     | 1.892**   | -0.041             | -0.025   | 0.358     | 0.062    |
| HH_ETH (ref: Ekoi): Yoruba                                      | -0.659    | -0.370    | -0.137    | -0.332    | 1.967**             | 1.501**  | 0.855     | 1.004     | -0.462             | -0.288   | -0.408    | -0.334   |
| HH_ETH (ref: Ekoi): Other                                       | -0.001    | 0.307     | 0.015     | -0.015    | 1.369**             | 0.946    | 0.373     | 0.781     | -0.441             | -0.414   | -0.089    | -0.337   |
| HH_SIZ                                                          | 0.030     | 0.022**   | 0.038**   | 0.044**   | -0.043              | -0.006   | -0.021*   | -0.035*   | 0.003              | -0.014   | -0.026**  | -0.021*  |
| HH_WEA                                                          | -0.247**  | -0.264**  | -0.186**  | -0.183**  | 0.177**             | 0.143**  | 0.106**   | 0.150**   | 0.082**            | 0.174**  | 0.118**   | 0.086**  |
| Constant                                                        | 2.344**   | 2.386**   | 1.702**   | 1.973**   | -3.864**            | -4.914** | -3.104**  | -3.415**  | -2.637**           | -2.205** | -2.397**  | -2.225** |
| Multilevel variance parameter: Level 1                          | 0.733**   | 0.652**   | 0.490**   | 0.619**   | 0.439*              | 1.004**  | 0.814**   | 0.606**   | 0.846**            | 0.761**  | 0.473**   | 0.639**  |
| Level 1 Observations (child)                                    | 1395      | 11609     | 16475     | 5233      | 1346                | 11609    | 16467     | 5211      | 1395               | 11609    | 16475     | 5233     |
| Level 2 Observations (LGA)                                      | 153       | 370       | 370       | 510       | 153                 | 370      | 370       | 510       | 153                | 370      | 370       | 510      |
| Akaike Information Criterion                                    | 1147.831  | 7880.9    | 12731.565 | 4519.37   | 901.306             | 5217.905 | 8321.506  | 3169.365  | 1222.345           | 8804.345 | 14843.344 | 5370.273 |
| Prob. > $\chi^2$                                                | <0.001    | <0.001    | <0.001    | <0.001    | <0.001              | <0.001   | <0.001    | <0.001    | <0.001             | <0.001   | <0.001    | <0.001   |

95% confidence intervals in brackets

\* p &lt; 0.10, \*\* p &lt; 0.05, \*\*\* p &lt; 0.01

**Table 6b-3: Additional robustness checks: year-wise stratification to detect time trends: antenatal care and child survival**

| Dependent variables: various indicators of maternal care and child survival (see right) | Antenatal care               |           |           |           |                           |           |           |           | Child survival |           |           |           |
|-----------------------------------------------------------------------------------------|------------------------------|-----------|-----------|-----------|---------------------------|-----------|-----------|-----------|----------------|-----------|-----------|-----------|
|                                                                                         | No. of antenatal care visits |           |           |           | No. of tetanus injections |           |           |           | Total exposure |           |           |           |
|                                                                                         | 2003                         | 2008      | 2013      | 2018      | 2003                      | 2008      | 2013      | 2018      | 2003           | 2008      | 2013      | 2018      |
| EXP_PREG                                                                                | 0.015                        | -0.051    | -0.024    | -0.054*** | 0.014                     | -0.012    | -0.005    | 0.006     |                |           |           |           |
| EXP_TOT_nod (total exposure, date approximation)                                        |                              |           |           |           |                           |           |           |           | -0.087         | -0.038*** | -0.006    | -0.037*** |
| CHI_AGE                                                                                 |                              |           |           |           |                           |           |           |           | -0.122*        | 0.007     | 0.001     | -0.003    |
| CHI_AGE2                                                                                |                              |           |           |           |                           |           |           |           | 0.005*         | 0.000     | 0.000     | 0.000*    |
| CHI_ORD                                                                                 |                              |           |           |           |                           |           |           |           | -0.159***      | -0.142*** | -0.138*** | -0.171*** |
| CHI_SEX                                                                                 |                              |           |           |           |                           |           |           |           | 0.182          | 0.283***  | 0.224***  | 0.151**   |
| MOT_ANC                                                                                 |                              |           |           |           |                           |           |           |           | 0.043*         | -0.009    | 0.006     | -0.005    |
| MOT_EDM                                                                                 | 0.122**                      | 0.123***  | 0.088***  | 0.074***  | 0.047***                  | 0.033***  | 0.028***  | 0.035***  | 0.066          | 0.007     | 0.023     | 0.003     |
| MOT_EDF                                                                                 | 0.094                        | 0.075***  | 0.093***  | 0.025     | 0.010                     | 0.020***  | 0.026***  | 0.023***  | 0.092**        | 0.035**   | 0.003     | 0.035**   |
| MOT_AWE                                                                                 | 2.141***                     | 1.721***  | 1.955***  | 1.553***  | 0.750***                  | 0.582***  | 0.640***  | 0.576***  |                |           |           |           |
| MOT_AGE                                                                                 | 0.035**                      | 0.005     | 0.016***  | 0.006     | 0.007                     | 0.002     | 0.001     | -0.005**  | 0.041*         | 0.013*    | 0.003     | 0.007     |
| HH_RUR                                                                                  | -0.486                       | -0.456*   | -0.726*** | -0.717*** | -0.115                    | -0.199*** | -0.171*** | -0.117*** | -0.067         | -0.236**  | -0.365*** | -0.049    |
| HH_REL (ref: Catholic): Other Christian                                                 | 0.320                        | -0.156    | -0.057    | 0.309     | 0.197                     | -0.051    | -0.049    | -0.085    | 0.083          | 0.041     | -0.247    | -0.412**  |
| HH_REL (ref: Catholic): Islam                                                           | 0.058                        | -0.153    | -0.203    | -0.025    | 0.004                     | -0.135**  | -0.125**  | -0.083    | 0.682**        | 0.195     | -0.303*   | -0.369*   |
| HH_REL (ref: Catholic): Traditionalist                                                  | -1.539***                    | -0.418    | -0.582    | -1.368**  | 0.075                     | -0.440*** | -0.357*** | -0.213    | -0.160         | -0.059    | -0.187    | 1.121     |
| HH_REL (ref: Catholic): Other                                                           | -4.444***                    | 1.812     | -1.774*** | 0.433     | -0.814***                 | 0.288     | -0.541    | -0.017    | 0.000          | -0.835    | 0.000     | 0.000     |
| HH_ETH (ref: Ekoi): Fulani                                                              | 0.000                        | -0.658    | 0.567     | -0.490    | 0.000                     | -0.541*** | -0.336**  | -0.281**  | 0.000          | -0.356    | 0.302*    | 0.472     |
| HH_ETH (ref: Ekoi): Hausa                                                               | 0.074                        | -0.617    | 1.027     | 0.037     | 0.062                     | -0.539*** | -0.179**  | -0.164    | -0.577         | -0.598    | -0.163    | 0.263     |
| HH_ETH (ref: Ekoi): Ibibio                                                              | 1.244                        | 1.024     | 0.716     | 0.064     | 0.364                     | -0.255    | -0.199    | 0.119     | -2.494***      | -0.137    | -0.204    | 0.185     |
| HH_ETH (ref: Ekoi): Igala                                                               | 3.934***                     | 0.215     | 0.941     | 0.854     | 2.076***                  | 0.024     | 0.189     | 0.193     | -1.161         | -0.713    | 0.528     | 0.114     |
| HH_ETH (ref: Ekoi): Igbo                                                                | 2.564***                     | 1.493**   | 2.530*    | 2.459***  | 0.657***                  | -0.077    | 0.103     | 0.301***  | -0.783         | -0.654    | -0.409*** | 0.289     |
| HH_ETH (ref: Ekoi): Ijaw / Izon                                                         | 1.149                        | -0.127    | 0.263     | -0.052    | 0.201                     | -0.184    | -0.198*   | -0.183    | -1.101         | -0.575    | -0.179    | 1.357**   |
| HH_ETH (ref: Ekoi): Kanuri / Beriberi                                                   | 1.003**                      | -0.914    | 1.163     | -0.290    | 0.223                     | -0.534*** | -0.157    | -0.234    | -0.102         | -0.529    | 0.231     | 0.571     |
| HH_ETH (ref: Ekoi): Tiv                                                                 | -0.068                       | -0.978    | 0.077     | 0.280     | 0.326                     | -0.565*** | -0.375**  | -0.197    | -0.327         | -0.847*   | -0.142    | 0.856     |
| HH_ETH (ref: Ekoi): Yoruba                                                              | 5.942***                     | 2.849***  | 3.553**   | 3.056***  | 0.767***                  | -0.071    | 0.049     | -0.027    | -1.234*        | -0.103    | 0.168     | 0.808     |
| HH_ETH (ref: Ekoi): Other                                                               | 1.491***                     | 0.149     | 1.326     | 0.679     | 0.556***                  | -0.211    | -0.040    | 0.059     | -0.829*        | -0.570    | 0.000     | 0.466     |
| HH_SIZ                                                                                  | -0.070**                     | -0.031*** | -0.066*** | -0.036**  | -0.009                    | -0.003    | -0.014*** | -0.001    | 0.059*         | 0.134***  | 0.153***  | 0.133***  |
| HH_WEA                                                                                  | 0.348**                      | 0.356**   | 0.297**   | 0.221**   | 0.076**                   | 0.073**   | 0.063**   | 0.037**   | 0.109**        | -0.018    | 0.018     | 0.015     |
| Constant                                                                                | 0.814                        | 2.695***  | 2.145     | 2.444***  | 0.054                     | 1.125***  | 1.010***  | 1.074***  | 2.191***       | 2.852***  | 2.839***  | 2.454***  |
| Multilevel variance parameter: Level 1                                                  | 0.446**                      | 0.674**   | 0.881**   | 0.382**   | -1.847***                 | -1.260*** | -1.339*** | -1.244*** | 0.269          | 0.035     | 0.079**   | 0.066**   |
| Multilevel variance parameter: Residual                                                 | 1.395***                     | 1.270***  | 1.350***  | 1.173***  | 0.126**                   | 0.041*    | 0.114**   | 0.036*    |                |           |           |           |
| Level 1 Observations (child)                                                            | 1400                         | 11781     | 16510     | 5328      | 1437                      | 12654     | 17086     | 5408      | 1921           | 14275     | 18276     | 17857     |
| Level 2 Observations (LGA)                                                              | 153                          | 370       | 370       | 511       | 154                       | 370       | 370       | 512       | 158            | 370       | 370       | 515       |
| Akaike Information Criterion                                                            | 8042.517                     | 64196.451 | 92468.14  | 28199.742 | 4511.606                  | 37408.855 | 52854.597 | 16072.681 | 1014.205       | 6786.461  | 7863.049  | 8003.619  |
| Prob. > $\chi^2$                                                                        | <0.001                       | <0.001    | <0.001    | <0.001    | <0.001                    | <0.001    | <0.001    | <0.001    | <0.001         | <0.001    | <0.001    | <0.001    |

95% confidence intervals in brackets

\* p &lt; 0.10, \*\* p &lt; 0.05, \*\*\* p &lt; 0.01

Table 6c: Additional robustness checks: exclusion of measles vaccine from full immunisation outcome

| Dependent variable: non-polio/-measles full immunisation status | Full model (by region)       |                              |                              |                              |                              |                              |                              |                              | Interaction model (EXPxAGE) (by region) |                              |                           |                           |                              |                              |
|-----------------------------------------------------------------|------------------------------|------------------------------|------------------------------|------------------------------|------------------------------|------------------------------|------------------------------|------------------------------|-----------------------------------------|------------------------------|---------------------------|---------------------------|------------------------------|------------------------------|
|                                                                 | Full model                   | Interaction model (EXPxAGE)  | North Central                | North East                   | North West                   | South East                   | South South                  | South West                   | North Central                           | North East                   | North West                | South East                | South South                  | South West                   |
| EXP_CHI                                                         | -0.020***<br>[-0.033,-0.008] | -0.032***<br>[-0.054,-0.010] | 0.028<br>[-0.003,0.059]      | -0.061***<br>[-0.094,-0.028] | -0.045<br>[-0.118,0.029]     | 0.051<br>[-0.100,0.202]      | -0.019<br>[-0.131,0.093]     | -0.064<br>[-0.154,0.026]     | 0.025<br>[-0.022,0.072]                 | -0.065***<br>[-0.110,-0.019] | -0.041<br>[-0.116,0.034]  | 0.057<br>[-0.157,0.271]   | -0.063<br>[-0.245,0.118]     | -0.085<br>[-0.213,0.043]     |
| EXPxAGE                                                         |                              | 0.000<br>[-0.000,0.001]      |                              |                              |                              |                              |                              |                              | 0.000<br>[-0.001,0.001]                 | 0.000<br>[-0.001,0.001]      | 0.000<br>[-0.001,0.001]   | -0.001<br>[-0.004,0.003]  | 0.001<br>[-0.002,0.003]      | 0.000<br>[-0.002,0.002]      |
| CHI_AGE                                                         | 0.026***<br>[0.010,0.042]    | 0.016***<br>[0.009,0.023]    | 0.009<br>[-0.023,0.041]      | 0.049**<br>[0.008,0.091]     | 0.051<br>[-0.015,0.117]      | 0.022<br>[-0.029,0.072]      | 0.008<br>[-0.031,0.048]      | 0.041**<br>[0.005,0.078]     | -0.003<br>[-0.019,0.014]                | 0.034***<br>[0.011,0.056]    | 0.033<br>[-0.015,0.081]   | 0.007<br>[-0.028,0.042]   | 0.011<br>[-0.015,0.038]      | 0.032***<br>[0.009,0.055]    |
| CHI_AGE2                                                        | 0.000<br>[-0.000,0.000]      |                              | 0.000<br>[-0.001,0.000]      | 0.000<br>[-0.001,0.000]      | 0.000<br>[-0.001,0.000]      | 0.000<br>[-0.001,0.001]      | 0.000<br>[-0.001,0.001]      | 0.000<br>[-0.001,0.000]      | 0.000<br>[-0.001,0.001]                 | 0.000<br>[-0.001,0.001]      | 0.000<br>[-0.001,0.001]   | 0.000<br>[-0.001,0.001]   | 0.000<br>[-0.001,0.001]      | 0.000<br>[-0.001,0.001]      |
| CHI_ORD                                                         | -0.046***<br>[-0.071,-0.020] | -0.046***<br>[-0.071,-0.020] | -0.018<br>[-0.072,0.036]     | -0.081***<br>[-0.142,-0.020] | -0.038<br>[-0.102,0.026]     | 0.003<br>[-0.072,0.078]      | -0.071**<br>[-0.136,-0.005]  | -0.056<br>[-0.131,0.020]     | -0.018<br>[-0.072,0.037]                | -0.082***<br>[-0.143,-0.021] | -0.038<br>[-0.101,0.026]  | 0.004<br>[-0.071,0.079]   | -0.071**<br>[-0.137,-0.005]  | -0.056<br>[-0.131,0.019]     |
| CHI_SEX                                                         | -0.006<br>[-0.084,0.072]     | -0.006<br>[-0.084,0.072]     | -0.050<br>[-0.208,0.108]     | -0.038<br>[-0.222,0.146]     | 0.048<br>[-0.149,0.244]      | -0.026<br>[-0.279,0.228]     | 0.158<br>[-0.045,0.362]      | -0.073<br>[-0.266,0.121]     | -0.048<br>[-0.206,0.110]                | -0.039<br>[-0.223,0.144]     | 0.045<br>[-0.151,0.242]   | -0.026<br>[-0.280,0.228]  | 0.158<br>[-0.045,0.362]      | -0.072<br>[-0.266,0.122]     |
| MOT_ANC                                                         | 0.061***<br>[0.052,0.071]    | 0.061***<br>[0.052,0.071]    | 0.100***<br>[0.077,0.123]    | 0.135***<br>[0.101,0.169]    | 0.070***<br>[0.035,0.106]    | 0.027<br>[-0.000,0.055]      | 0.044***<br>[0.022,0.066]    | 0.041***<br>[0.025,0.057]    | 0.100***<br>[0.077,0.123]               | 0.135***<br>[0.101,0.169]    | 0.071***<br>[0.035,0.106] | 0.027<br>[-0.001,0.054]   | 0.044***<br>[0.023,0.066]    | 0.041***<br>[0.025,0.058]    |
| MOT_EDM                                                         | 0.056***<br>[0.037,0.074]    | 0.056***<br>[0.037,0.074]    | 0.054***<br>[0.019,0.090]    | 0.049***<br>[0.008,0.091]    | 0.073***<br>[0.027,0.119]    | 0.073***<br>[0.005,0.142]    | 0.046***<br>[-0.007,0.098]   | 0.044***<br>[-0.006,0.094]   | 0.054***<br>[0.019,0.089]               | 0.049***<br>[0.007,0.091]    | 0.073***<br>[0.027,0.118] | 0.073***<br>[0.006,0.143] | 0.045***<br>[-0.008,0.098]   | 0.044***<br>[-0.006,0.094]   |
| MOT_EDF                                                         | 0.024***<br>[0.006,0.043]    | 0.024***<br>[0.006,0.043]    | 0.035***<br>[-0.002,0.072]   | 0.014<br>[-0.026,0.055]      | 0.044***<br>[0.002,0.085]    | 0.014<br>[-0.057,0.085]      | 0.024<br>[-0.034,0.082]      | -0.033<br>[-0.086,0.020]     | 0.035***<br>[-0.002,0.072]              | 0.014<br>[-0.026,0.055]      | 0.044***<br>[0.003,0.085] | 0.013<br>[-0.058,0.084]   | 0.024<br>[-0.034,0.082]      | -0.034<br>[-0.086,0.019]     |
| MOT_AWE                                                         | 3.124***<br>[3.008,3.240]    | 3.121***<br>[3.005,3.237]    | 2.731***<br>[2.505,2.956]    | 2.920***<br>[2.644,3.196]    | 3.684***<br>[3.415,3.953]    | 3.059***<br>[2.682,3.436]    | 3.248***<br>[2.649,3.281]    | 2.965***<br>[2.892,3.604]    | 2.730***<br>[2.505,2.955]               | 2.920***<br>[2.644,3.196]    | 3.683***<br>[3.414,3.952] | 3.053***<br>[2.677,3.430] | 2.964***<br>[2.648,3.280]    | 3.240***<br>[2.885,3.595]    |
| MOT_AGE                                                         | 0.021***<br>[0.012,0.030]    | 0.021***<br>[0.012,0.030]    | 0.011<br>[-0.007,0.029]      | 0.031***<br>[0.008,0.054]    | 0.033***<br>[0.008,0.058]    | 0.016<br>[-0.012,0.043]      | 0.023***<br>[0.001,0.045]    | 0.015<br>[-0.007,0.036]      | 0.011<br>[-0.007,0.029]                 | 0.031***<br>[0.008,0.054]    | 0.033***<br>[0.008,0.057] | 0.015<br>[-0.012,0.043]   | 0.023***<br>[0.001,0.046]    | 0.015<br>[-0.007,0.037]      |
| HH_RUR                                                          | -0.150***<br>[-0.260,-0.040] | -0.150***<br>[-0.259,-0.040] | -0.045<br>[-0.279,0.188]     | -0.214<br>[-0.490,0.063]     | -0.172<br>[-0.484,0.140]     | -0.073<br>[-0.374,0.228]     | -0.037<br>[-0.299,0.226]     | -0.377***<br>[-0.645,-0.109] | -0.044<br>[-0.278,0.190]                | -0.214<br>[-0.491,0.062]     | -0.173<br>[-0.485,0.138]  | -0.072<br>[-0.374,0.229]  | -0.036<br>[-0.298,0.226]     | -0.376***<br>[-0.644,-0.108] |
| HH_REL (ref: Catholic): Other Christian                         | -0.187***<br>[-0.343,-0.031] | -0.188***<br>[-0.344,-0.032] | -0.111<br>[-0.387,0.164]     | -0.611***<br>[-1.272,0.051]  | 0.389<br>[-0.330,1.108]      | -0.263<br>[-0.542,0.016]     | -0.345<br>[-0.726,0.036]     | -0.132<br>[-0.710,0.447]     | -0.112<br>[-0.387,0.163]                | -0.616***<br>[-1.276,0.044]  | 0.387<br>[-0.332,1.106]   | -0.261<br>[-0.540,0.018]  | -0.350<br>[-0.730,0.031]     | -0.132<br>[-0.710,0.447]     |
| HH_REL (ref: Catholic): Islam                                   | -0.575***<br>[-0.761,-0.389] | -0.571***<br>[-0.757,-0.385] | -0.448***<br>[-0.759,-0.137] | -1.070***<br>[-1.744,-0.396] | -0.348<br>[-1.166,0.470]     | -0.342<br>[-3.017,2.333]     | -0.101<br>[-0.916,0.714]     | -0.464<br>[-1.059,0.131]     | -0.446***<br>[-0.758,-0.135]            | -1.080***<br>[-1.752,-0.407] | -0.348<br>[-1.166,0.469]  | -0.336<br>[-3.009,2.336]  | -0.103<br>[-0.917,0.712]     | -0.463<br>[-1.057,0.132]     |
| HH_REL (ref: Catholic): Traditionalist                          | -0.757***<br>[-1.166,-0.347] | -0.756***<br>[-1.165,-0.346] | -0.964***<br>[-2.082,0.155]  | -1.116***<br>[-2.434,0.202]  | -0.812<br>[-2.396,0.773]     | -0.562<br>[-1.235,0.110]     | -0.866***<br>[-1.896,0.163]  | -0.025<br>[-1.378,1.327]     | -0.953***<br>[-2.070,0.163]             | -1.136***<br>[-2.452,0.180]  | -0.789<br>[-2.370,0.792]  | -0.557<br>[-1.230,0.115]  | -0.872***<br>[-1.903,0.158]  | -0.044<br>[-1.393,1.305]     |
| HH_REL (ref: Catholic): Other                                   | -0.098<br>[-1.149,0.952]     | -0.106<br>[-1.156,0.943]     | -0.138<br>[-2.341,2.065]     | 0.000<br>[0.000,0.000]       | 0.000<br>[0.000,0.000]       | 0.000<br>[0.000,0.000]       | 0.000<br>[0.000,0.000]       | -0.301<br>[-1.596,0.994]     | 0.447<br>[-3.479,4.372]                 | -0.137<br>[-2.338,2.065]     | 0.000<br>[0.000,0.000]    | 0.000<br>[0.000,0.000]    | -0.306<br>[-1.600,0.989]     | 0.436<br>[-3.479,4.350]      |
| HH_ETH (ref: Ekoi): Fulani                                      | -0.847***<br>[-1.388,-0.305] | -0.833***<br>[-1.375,-0.292] | -0.261<br>[-0.817,0.295]     | -0.138<br>[-0.430,0.154]     | 0.316<br>[-0.343,0.975]      | 0.000<br>[0.000,0.000]       | 0.000<br>[0.000,0.000]       | 0.000<br>[0.000,0.000]       | -0.881<br>[-1.937,0.175]                | -0.252<br>[-0.807,0.303]     | -0.142<br>[-0.434,0.150]  | 0.319<br>[-0.339,0.978]   | 0.000<br>[0.000,0.000]       | -0.863<br>[-1.918,0.193]     |
| HH_ETH (ref: Ekoi): Hausa                                       | -0.804***<br>[-1.328,-0.281] | -0.784***<br>[-1.307,-0.260] | -0.461***<br>[-0.849,-0.073] | -0.137<br>[-0.433,0.158]     | 0.410<br>[-0.106,0.925]      | -0.677<br>[-3.000,1.646]     | -0.163<br>[-2.964,2.638]     | -0.110<br>[-1.047,0.828]     | -0.459**<br>[-0.848,-0.071]             | -0.137<br>[-0.432,0.159]     | 0.412<br>[-0.103,0.928]   | -0.660<br>[-2.980,1.660]  | -0.164<br>[-2.970,2.643]     | -0.113<br>[-1.050,0.825]     |
| HH_ETH (ref: Ekoi): Ibibio                                      | -0.582***<br>[-1.158,-0.006] | -0.582***<br>[-1.158,-0.006] | -1.077<br>[-3.132,0.979]     | 0.000<br>[0.000,0.000]       | 0.000<br>[0.000,0.000]       | -0.764<br>[-3.466,1.937]     | -0.963***<br>[-1.527,-0.399] | 0.727<br>[-0.674,2.128]      | -1.082<br>[-3.140,0.977]                | 0.000<br>[0.000,0.000]       | 0.000<br>[0.000,0.000]    | -0.748<br>[-3.447,1.951]  | -0.960***<br>[-1.522,-0.397] | 0.734<br>[-0.667,2.134]      |
| HH_ETH (ref: Ekoi): Igala                                       | -0.733***<br>[-1.359,-0.106] | -0.731***<br>[-1.358,-0.105] | -0.423***<br>[-0.832,-0.014] | 0.000<br>[0.000,0.000]       | 0.000<br>[0.000,0.000]       | -1.131<br>[-3.896,1.635]     | -1.242<br>[-3.919,1.435]     | 1.297<br>[-0.300,2.894]      | -0.428**<br>[-0.837,-0.019]             | 0.000<br>[0.000,0.000]       | 0.000<br>[0.000,0.000]    | -1.134<br>[-3.897,1.630]  | -1.257<br>[-3.956,1.441]     | 1.306<br>[-0.293,2.905]      |
| HH_ETH (ref: Ekoi): Igbo                                        | -0.031<br>[-0.543,0.480]     | -0.031<br>[-0.542,0.481]     | -0.312<br>[-0.873,0.248]     | 0.195<br>[-1.479,1.868]      | 0.011<br>[-1.068,1.090]      | -0.421<br>[-1.915,1.074]     | -0.199<br>[-0.831,0.433]     | 0.848***<br>[0.231,1.465]    | -0.305<br>[-0.865,0.255]                | 0.206<br>[-1.466,1.877]      | 0.013<br>[-1.065,1.091]   | -0.411<br>[-1.904,1.081]  | -0.198<br>[-0.829,0.433]     | 0.850***<br>[0.233,1.466]    |
| HH_ETH (ref: Ekoi): Ijaw / Izon                                 | -0.418<br>[-1.001,0.166]     | -0.419<br>[-1.002,0.165]     | 0.000<br>[0.000,0.000]       | 0.000<br>[0.000,0.000]       | 0.000<br>[0.000,0.000]       | 0.000<br>[0.000,0.000]       | -0.772***<br>[-1.306,-0.238] | -1.020<br>[-2.616,0.577]     | 0.000<br>[0.000,0.000]                  | 0.000<br>[0.000,0.000]       | 0.000<br>[0.000,0.000]    | 0.000<br>[0.000,0.000]    | -0.767***<br>[-1.300,-0.234] | -1.030<br>[-2.626,0.567]     |
| HH_ETH (ref: Ekoi): Kanuri / Beriberi                           | -0.940***<br>[-1.569,-0.312] | -0.915***<br>[-1.544,-0.286] | -0.903<br>[-2.583,0.778]     | -0.278<br>[-0.722,0.166]     | 0.270<br>[-0.982,1.522]      | 0.000<br>[0.000,0.000]       | 0.000<br>[0.000,0.000]       | 2.526*<br>[-0.454,5.506]     | -0.891<br>[-2.572,0.791]                | -0.272<br>[-0.716,0.172]     | 0.279<br>[-0.973,1.530]   | 0.000<br>[0.000,0.000]    | 0.000<br>[0.000,0.000]       | 2.558*<br>[-0.428,5.545]     |
| HH_ETH (ref: Ekoi): Tiv                                         | -0.529*<br>[-1.122,0.064]    | -0.525*<br>[-1.118,0.068]    | -0.187<br>[-0.574,0.200]     | -0.336<br>[-1.274,0.603]     | 0.000<br>[0.000,0.000]       | 0.000<br>[0.000,0.000]       | 0.000<br>[0.000,0.000]       | 0.000<br>[-0.382,3.342]      | -0.189<br>[-0.576,0.198]                | -0.360<br>[-1.298,0.579]     | 0.000<br>[0.000,0.000]    | 0.000<br>[0.000,0.000]    | 0.000<br>[0.000,0.000]       | 1.493<br>[-0.363,3.349]      |
| HH_ETH (ref: Ekoi): Yoruba                                      | -0.398<br>[-0.916,0.120]     | -0.395<br>[-0.913,0.123]     | 0.162<br>[-0.192,0.516]      | -0.053<br>[-1.510,1.403]     | 0.949<br>[-0.456,2.355]      | 0.000<br>[0.000,0.000]       | 0.000<br>[-3.204,-1.254]     | 0.163<br>[-0.007,0.633]      | 0.163<br>[-0.191,0.517]                 | -0.042<br>[-1.498,1.414]     | 0.945<br>[-0.452,2.341]   | 0.000<br>[0.000,0.000]    | -2.222***<br>[-3.196,-1.248] | 0.313*<br>[-0.007,0.633]     |
| HH_ETH (ref: Ekoi): Other                                       | -0.499*<br>[-0.999,0.001]    | -0.490*<br>[-0.989,0.010]    | 0.000<br>[0.000,0.000]       | 0.000<br>[0.000,0.000]       | 0.000<br>[0.000,0.000]       | 0.000<br>[0.000,0.000]       | -0.852***<br>[-1.356,-0.347] | 0.000<br>[0.000,0.000]       | 0.000<br>[0.000,0.000]                  | 0.000<br>[0.000,0.000]       | 0.000<br>[0.000,0.000]    | 0.000<br>[0.000,0.000]    | -0.850***<br>[-1.353,-0.346] | 0.000<br>[0.000,0.000]       |
| HH_SIZ                                                          | -0.014**<br>[-0.027,-0.001]  | -0.014**<br>[-0.027,-0.001]  | -0.012<br>[-0.038,0.014]     | -0.021*<br>[-0.046,0.003]    | -0.010<br>[-0.038,0.019]     | -0.037<br>[-0.083,0.009]     | -0.013<br>[-0.059,0.033]     | 0.004<br>[-0.047,0.055]      | -0.013<br>[-0.038,0.013]                | -0.021*<br>[-0.046,0.003]    | -0.009<br>[-0.037,0.019]  | -0.037<br>[-0.083,0.008]  | -0.013<br>[-0.059,0.033]     | 0.004<br>[-0.047,0.055]      |
| HH_WEA                                                          | 0.132***<br>[0.111,0.153]    | 0.132***<br>[0.111,0.153]    | 0.140***<br>[0.095,0.184]    | 0.112***<br>[0.059,0.165]    | 0.120***<br>[0.067,0.173]    | 0.152***<br>[0.090,0.214]    | 0.107***<br>[0.057,0.157]    | 0.121***<br>[0.064,0.179]    | 0.139***<br>[0.095,0.184]               | 0.112***<br>[0.059,0.165]    | 0.120***<br>[0.067,0.173] | 0.152***<br>[0.090,0.214] | 0.107***<br>[0.057,0.157]    | 0.122***<br>[0.065,0.179]    |
| YEAR (ref: 2003): 2008                                          | 0.784***<br>[0.524,1.044]    | 0.812***<br>[0.551,1.073]    | 1.026***<br>[0.528,1.525]    | 0.798***<br>[0.030,1.567]    | 1.350***<br>[0.502,2.198]    | 1.354***<br>[0.679,2.029]    | 0.961***<br>[0.237,1.685]    | -0.273<br>[-0.981,0.436]     | 1.044***<br>[0.543,1.545]               | 0.826***<br>[0.054,1.598]    | 1.352***<br>[0.501,2.203] | 1.355***<br>[0.680,2.029] | 0.952***<br>[0.228,1.676]    | -0.237<br>[-0.948,0.473]     |
| YEAR (ref: 2003): 2013                                          | 1.032***<br>[0.773,1.290]    | 1.064***<br>[0.804,1.324]    | 0.870***<br>[0.375,1.365]    | 1.389***<br>[0.625,2.153]    | 1.696***<br>[0.745,2.647]    | 1.767***<br>[1.092,2.442]    | 1.833***<br>[1.113,2.552]    | -0.659*<br>[-1.375,0.056]    | 0.894***<br>[0.397,1.391]               | 1.419***<br>[0.652,2.186]    | 1.673***<br>[0.725,2.621] | 1.787***<br>[1.111,2.463] | 1.859***<br>[1.137,2.582]    | -0.617*<br>[-1.333,0.099]    |
| YEAR (ref: 2003): 2018                                          | 1.237***<br>[0.970,1.505]    | 1.252***<br>[0.985,1.518]    | 1.389***<br>[0.874,1.904]    | 1.753***<br>[0.978,2.528]    | 1.447***<br>[0.609,2.285]    | 2.088***<br>[1.281,2.896]    | 1.779***<br>[0.959,2.599]    | -0.572<br>[-1.341,0.197]     | 1.410***<br>[0.896,1.923]               | 1.789***<br>[1.014,2.563]    | 1.490***<br>[0.659,2.322] | 2.084***<br>[1.257,2.911] | 1.711***<br>[0.864,2.559]    | -0.585<br>[-1.356,0.186]     |
| Constant                                                        | -4.445***<br>[-5.084,-3.806] | -4.303***<br>[-4.926,-3.680] | -4.563***<br>[-5.376,-3.750] | -5.058***<br>[-6.190,-3.926] | -7.592***<br>[-8.962,-6.223] | -4.376***<br>[-6.286,-2.466] | -3.903***<br>[-5.111,-2.694] | -3.203***<br>[-4.375,-2.032] | -4.425***<br>[-5.190,-3.660]            | -4.860***<br>[-5.941,-3.779] | -7.380***<br>[-8.692,-    |                           |                              |                              |

Table 6d: Additional robustness checks: decomposition of SIA exposure into different campaign types

| Dependent variables: various indicators of routine immunisation, maternal care and child survival (see right) | Non-polio full immunisation (full model) | Delivery  |                     |                    |                              |                           | Antenatal care |            | Child survival (total exposure) | Non-polio full immunisation status (by region) |            |             |            |          |          |
|---------------------------------------------------------------------------------------------------------------|------------------------------------------|-----------|---------------------|--------------------|------------------------------|---------------------------|----------------|------------|---------------------------------|------------------------------------------------|------------|-------------|------------|----------|----------|
|                                                                                                               |                                          | At home   | At private facility | At public facility | No. of antenatal care visits | No. of tetanus injections | Full model     |            |                                 |                                                |            |             |            |          |          |
|                                                                                                               |                                          |           |                     |                    |                              |                           | North Central  | North East |                                 | North West                                     | South East | South South | South West |          |          |
| EXP_CHI (NIDs and sNIDs)                                                                                      | -0.037***                                |           |                     |                    |                              |                           |                |            | 0.008                           | -0.151***                                      | -0.056     | 0.038       | 0.118*     | -0.103*  |          |
| EXP_CHI (IPDs and sIPDs)                                                                                      | -0.025***                                |           |                     |                    |                              |                           |                |            | 0.043**                         | -0.093***                                      | -0.078*    | 0.119       | 0.189***   | -0.072   |          |
| EXP_CHI (mop-up campaigns)                                                                                    | -0.007                                   |           |                     |                    |                              |                           |                |            | -0.011                          | 0.027                                          | -0.139**   | 0.000       | 0.000      | 0.303    |          |
| EXP_CHI (MNCHW)                                                                                               | -0.047                                   |           |                     |                    |                              |                           |                |            | -0.175                          | -0.102                                         | 0.117      | -0.034      | -0.348***  | -0.030   |          |
| EXP_PREG (NIDs and sNIDs)                                                                                     | 0.014                                    | -0.063*** | 0.003               | -0.043*            | 0.002                        |                           |                |            |                                 |                                                |            |             |            |          |          |
| EXP_PREG (IPDs and sIPDs)                                                                                     | 0.004                                    | -0.093*** | 0.020*              | -0.059***          | -0.007                       |                           |                |            |                                 |                                                |            |             |            |          |          |
| EXP_PREG (mop-up campaigns)                                                                                   | -0.012                                   | -0.021    | 0.017               | 0.022              | 0.013*                       |                           |                |            |                                 |                                                |            |             |            |          |          |
| EXP_PREG (MNCHW)                                                                                              | 0.088**                                  | 0.024     | -0.075**            | 0.111*             | 0.027*                       |                           |                |            |                                 |                                                |            |             |            |          |          |
| EXP_TOT_nod (NIDs and sNIDs)                                                                                  |                                          |           |                     |                    |                              |                           |                |            | -0.035***                       |                                                |            |             |            |          |          |
| EXP_TOT_nod (IPDs and sIPDs)                                                                                  |                                          |           |                     |                    |                              |                           |                |            | -0.014***                       |                                                |            |             |            |          |          |
| EXP_TOT_nod (mop-up campaigns)                                                                                |                                          |           |                     |                    |                              |                           |                |            | -0.018                          |                                                |            |             |            |          |          |
| EXP_TOT_nod (MNCHW)                                                                                           |                                          |           |                     |                    |                              |                           |                |            | 0.040                           |                                                |            |             |            |          |          |
| CHI_AGE                                                                                                       | 0.079***                                 |           |                     |                    |                              |                           |                |            | -0.004                          | 0.072***                                       | 0.082***   | 0.109***    | 0.121***   | 0.100*** | 0.081*** |
| CHI_AGE2                                                                                                      | -0.001***                                |           |                     |                    |                              |                           |                |            | 0.000                           | -0.001***                                      | 0.000      | -0.001**    | -0.002***  | -0.002** | -0.001** |
| CHI_ORD                                                                                                       | -0.060***                                |           |                     |                    |                              |                           |                |            | -0.154***                       | -0.034                                         | -0.071**   | -0.063*     | -0.036     | -0.074** | -0.087** |
| CHI_SEX                                                                                                       | -0.004                                   |           |                     |                    |                              |                           |                |            | 0.212***                        | -0.075                                         | 0.022      | 0.045       | -0.147     | 0.196**  | -0.006   |
| MOT_ANC                                                                                                       | 0.055***                                 | -0.138*** | 0.057***            | 0.062***           |                              |                           |                |            | -0.001                          | 0.094***                                       | 0.145***   | 0.064***    | 0.031***   | 0.041*** | 0.039*** |
| MOT_EDM                                                                                                       | 0.061***                                 | -0.065*** | 0.052***            | 0.057***           | 0.097***                     | 0.031***                  |                |            | 0.013                           | 0.070***                                       | 0.072***   | 0.067***    | 0.054*     | 0.053*   | 0.043*   |
| MOT_EDF                                                                                                       | 0.010                                    | -0.030*** | 0.033***            | 0.035***           | 0.083***                     | 0.023***                  | 0.028***       | 0.006      | 0.006                           | 0.029                                          | 0.016      | 0.007       | -0.030     |          |          |
| MOT_AWE                                                                                                       | 2.972***                                 | -0.916*** | 0.275***            | 0.984***           | 1.937***                     | 0.640***                  |                |            |                                 | 2.561***                                       | 2.882***   | 3.549***    | 2.629***   | 2.927*** | 2.959*** |
| MOT_AGE                                                                                                       | 0.026***                                 | -0.002    | 0.001               | 0.002              | 0.011**                      | 0.000                     | 0.010**        | 0.017*     | 0.031**                         | 0.037***                                       | 0.013      | 0.027**     | 0.031**    |          |          |
| HH_RUR                                                                                                        | -0.087*                                  | 0.538***  | -0.375***           | -0.325***          | -0.591***                    | -0.156***                 | -0.179***      | -0.038     | -0.155                          | -0.093                                         | -0.092     | -0.038      | -0.239*    |          |          |
| HH_REL (ref: Catholic): Other Christian                                                                       | -0.126*                                  | 0.095     | -0.095              | 0.011              | -0.055                       | -0.047*                   | -0.137         | -0.105     | -0.562*                         | 0.465                                          | -0.109     | -0.409**    | -0.093     |          |          |
| HH_REL (ref: Catholic): Islam                                                                                 | -0.472***                                | 0.229***  | -0.238***           | -0.028             | -0.167                       | -0.100***                 | -0.069         | -0.379**   | -1.077***                       | -0.301                                         | -0.073     | 0.020       | -0.403     |          |          |
| HH_REL (ref: Catholic): Traditionalist                                                                        | -0.548***                                | 1.008***  | -0.914***           | -0.478***          | -0.650***                    | -0.349***                 | -0.091         | -0.697     | -1.628**                        | -0.649                                         | -0.246     | -0.724      | -0.190     |          |          |
| HH_REL (ref: Catholic): Other                                                                                 | -0.224                                   | -0.259    | 0.021               | 0.383              | -0.057                       | -0.135                    | 0.573          | 0.000      | 0.000                           | 0.000                                          | 0.000      | -0.301      | 0.946      |          |          |
| HH_ETH (ref: Ekoi): Fulani                                                                                    | -0.926***                                | 0.673***  | -0.070              | -0.768***          | -0.745                       | -0.347***                 | -0.186         | -0.085     | -0.060                          | 0.110                                          | 0.000      |             | -0.692     |          |          |
| HH_ETH (ref: Ekoi): Hausa                                                                                     | -0.847***                                | 0.945***  | -0.572              | -0.828***          | -0.437                       | -0.250***                 | -0.504         | -0.483**   | -0.073                          | 0.361                                          | -1.194     | -1.657      | -0.229     |          |          |
| HH_ETH (ref: Ekoi): Ibibio                                                                                    | -0.633**                                 | 0.372     | 0.555               | -0.301             | -0.212                       | -0.103                    | -0.477         | -0.665     | 0.000                           | 0.000                                          | -0.358     | -0.902***   | 1.125      |          |          |
| HH_ETH (ref: Ekoi): Igala                                                                                     | -0.657**                                 | -0.513    | 1.298***            | 0.040              | 0.004                        | 0.276*                    | -0.400         | -0.132     | 0.000                           | 0.000                                          | -0.644     | -0.762      | 0.698      |          |          |
| HH_ETH (ref: Ekoi): Igbo                                                                                      | -0.450*                                  | -0.795*** | 1.881***            | -0.568***          | 1.248*                       | 0.120                     | -0.528*        | -0.163     | 0.534                           | 0.274                                          | -0.896     | -0.502*     | 0.524**    |          |          |
| HH_ETH (ref: Ekoi): Ijaw / Izon                                                                               | -0.486*                                  | 0.883***  | 0.118               | -0.806***          | -0.696                       | -0.134                    | -0.080         | 0.000      | 0.000                           | 0.000                                          |            |             | -0.636     |          |          |
| HH_ETH (ref: Ekoi): Kanuri / Beriberi                                                                         | -0.987***                                | 1.001***  | -0.518              | -0.956***          | -0.512                       | -0.237*                   | -0.271         | -0.661     | 0.639                           |                                                | 0.000      | 2.778*      |            |          |          |
| HH_ETH (ref: Ekoi): Tiv                                                                                       | -0.601**                                 | -0.775*** | 1.727***            | 0.134              | -0.904                       | -0.343**                  | -0.365         | -0.104     | -0.251                          | 0.000                                          | 0.000      | 0.000       | 1.786*     |          |          |
| HH_ETH (ref: Ekoi): Yoruba                                                                                    | -0.570**                                 | -0.165    | 1.300***            | -0.413**           | 2.235***                     | 0.059                     | -0.048         | 0.187      | 0.329                           | 0.649                                          | 0.000      | -2.187***   | 0.292*     |          |          |
| HH_ETH (ref: Ekoi): Other                                                                                     | -0.616***                                | 0.206     | 0.912**             | -0.349*            | 0.030                        | -0.017                    | -0.361         | 0.000      | 0.000                           | 0.000                                          | 0.000      | -0.887***   | 0.000      |          |          |
| HH_SIZ                                                                                                        | -0.013**                                 | 0.033**   | -0.017**            | -0.020**           | -0.043**                     | -0.006**                  | 0.132**        | -0.011     | -0.021*                         | -0.008                                         | -0.011     | -0.019      | -0.011     |          |          |
| HH_WEA                                                                                                        | 0.142***                                 | -0.206*** | 0.120***            | 0.129***           | 0.287***                     | 0.059***                  | 0.016          | 0.149***   | 0.102***                        | 0.132***                                       | 0.165***   | 0.121***    | 0.142***   |          |          |
| YEAR (ref: 2003): 2008                                                                                        | 0.578***                                 | 0.021     | -0.203*             | 0.056              | -0.569***                    | -0.080*                   | 0.268*         | 0.808***   | 0.797*                          | 1.411***                                       | 0.666*     | 0.675*      | -0.271     |          |          |
| YEAR (ref: 2003): 2013                                                                                        | 0.726***                                 | -0.033    | -0.354***           | 0.131              | -0.217                       | -0.005                    | 0.330**        | 0.760**    | 1.279**                         | 1.883**                                        | 0.724**    | 1.410**     | -0.820**   |          |          |
| YEAR (ref: 2003): 2018                                                                                        | 0.808***                                 | -0.228**  | -0.412***           | 0.342**            | -1.275***                    | -0.051                    | 0.282**        | 1.141**    | 1.521**                         | 1.159**                                        | 1.034**    | 1.843**     | -0.801**   |          |          |
| Constant                                                                                                      | -5.234***                                | 2.038***  | -3.645***           | -2.427***          | 3.586**                      | 0.980**                   | 2.596**        | -5.701***  | -5.778***                       | -8.231***                                      | -4.939***  | -5.672***   | -4.425***  |          |          |
| Multilevel variance parameter: Level 1                                                                        | 0.285***                                 | 0.451***  | 0.710***            | 0.463***           | 0.672***                     | -1.437***                 | 0.041***       | 0.171***   | 0.146**                         | 0.705***                                       | 0.168**    | 0.029       | 0.243***   |          |          |
| Multilevel variance parameter: Residual                                                                       |                                          |           |                     |                    |                              |                           |                |            | 1.322***                        | 0.090**                                        |            |             |            |          |          |
| Level 1 Observations (child)                                                                                  | 24381                                    | 34713     | 34713               | 34713              | 35019                        | 36585                     | 52431          | 4342       | 5017                            | 7249                                           | 2036       | 2514        | 3196       |          |          |
| Level 2 Observations (LGA)                                                                                    | 684                                      | 686       | 686                 | 686                | 686                          | 687                       | 689            | 113        | 100                             | 166                                            | 85         | 111         | 121        |          |          |
| Akaike Information Criterion                                                                                  | 18035.652                                | 26423.512 | 17597.951           | 30317.164          | 193631.04                    | 111221.63                 | 23679.445      | 4154.682   | 2852.628                        | 2871.344                                       | 2200.745   | 2604.453    | 3247.815   |          |          |
| Prob. > X <sup>2</sup>                                                                                        | <0.001                                   | <0.001    | <0.001              | <0.001             | <0.001                       | <0.001                    | <0.001         | <0.001     | <0.001                          | <0.001                                         | <0.001     | <0.001      | <0.001     | <0.001   |          |

95% confidence intervals in brackets. NID = National Immunisation Day; sNID = sub-National Immunisation Day; IPD = Immunisation-Plus Day; sIPD = sub-national Immunisation-Plus Day; MNCHW = Maternal, Neonatal, and Child Health Week; SIA = Supplementary Immunisation Activity.

\* p < 0.10, \*\* p < 0.05, \*\*\* p < 0.01



**Table 6e: Additional robustness checks: fixed effects models**

| <i>Dependent variables: various indicators of routine immunisation, maternal care and child survival (see right)</i> | <b>Non-polio full immunisation</b> |                              | <b>Delivery</b>              |                              |                              | <b>Antenatal care</b>        |                              | <b>Child</b>                 |
|----------------------------------------------------------------------------------------------------------------------|------------------------------------|------------------------------|------------------------------|------------------------------|------------------------------|------------------------------|------------------------------|------------------------------|
|                                                                                                                      | Full model                         | Interaction model (EXPxAGE)  | At home                      | At private facility          | At public facility           | No. of antenatal care visits | No. of tetanus injections    | Total exposure               |
| EXP_CHI                                                                                                              | -0.020**<br>[-0.036,-0.004]        | 0.034**<br>[0.006,0.062]     |                              |                              |                              |                              |                              |                              |
| EXPxAGE                                                                                                              |                                    | -0.001***<br>[-0.002,-0.001] |                              |                              |                              |                              |                              |                              |
| EXP_PREG                                                                                                             |                                    |                              | -0.016<br>[-0.038,0.006]     | 0.007<br>[-0.023,0.037]      | 0.011<br>[-0.009,0.032]      | 0.023<br>[-0.005,0.052]      | 0.012***<br>[0.004,0.021]    |                              |
| EXP_TOT_nod (total exposure, date approximation)                                                                     |                                    |                              |                              |                              |                              |                              |                              | -0.029***<br>[-0.041,-0.017] |
| CHI_AGE                                                                                                              | 0.080***<br>[0.064,0.095]          | 0.036***<br>[0.028,0.043]    |                              |                              |                              |                              |                              | 0.001<br>[-0.010,0.011]      |
| CHI_AGE2                                                                                                             | -0.001***<br>[-0.001,-0.001]       |                              |                              |                              |                              |                              |                              | 0.000<br>[-0.000,0.000]      |
| CHI_ORD                                                                                                              | -0.059***<br>[-0.085,-0.034]       | -0.060***<br>[-0.085,-0.034] |                              |                              |                              |                              |                              | -0.148***<br>[-0.171,-0.125] |
| CHI_SEX                                                                                                              | -0.001<br>[-0.078,0.076]           | -0.003<br>[-0.080,0.074]     |                              |                              |                              |                              |                              | 0.212***<br>[0.139,0.285]    |
| MOT_ANC                                                                                                              | 0.059***<br>[0.049,0.068]          | 0.059***<br>[0.049,0.068]    | -0.133***<br>[-0.142,-0.125] | 0.047***<br>[0.039,0.055]    | 0.063***<br>[0.056,0.070]    |                              |                              | 0.003<br>[-0.008,0.013]      |
| MOT_EDM                                                                                                              | 0.060***<br>[0.042,0.079]          | 0.060***<br>[0.042,0.079]    | -0.059***<br>[-0.074,-0.044] | 0.040***<br>[0.019,0.061]    | 0.053***<br>[0.038,0.067]    | 0.091***<br>[0.070,0.112]    | 0.027***<br>[0.021,0.033]    | 0.015<br>[-0.005,0.035]      |
| MOT_EDF                                                                                                              | 0.002<br>[-0.017,0.021]            | 0.002<br>[-0.017,0.021]      | -0.028***<br>[-0.043,-0.013] | 0.018<br>[-0.004,0.040]      | 0.033***<br>[0.019,0.048]    | 0.078***<br>[0.059,0.097]    | 0.019***<br>[0.014,0.025]    | 0.033***<br>[0.015,0.051]    |
| MOT_AWE                                                                                                              | 2.988***<br>[2.858,3.117]          | 2.984***<br>[2.854,3.113]    | -0.904***<br>[-0.982,-0.827] | 0.237***<br>[0.123,0.352]    | 0.951***<br>[0.873,1.030]    | 1.899***<br>[1.796,2.002]    | 0.615***<br>[0.586,0.645]    |                              |
| MOT_AGE                                                                                                              | 0.026***<br>[0.018,0.035]          | 0.027***<br>[0.018,0.036]    | -0.002<br>[-0.007,0.004]     | -0.002<br>[-0.009,0.005]     | 0.002<br>[-0.002,0.007]      | 0.010***<br>[0.003,0.016]    | 0.000<br>[-0.002,0.002]      | 0.008*<br>[-0.000,0.017]     |
| HH_RUR                                                                                                               | -0.088<br>[-0.211,0.035]           | -0.091<br>[-0.214,0.033]     | 0.531***<br>[0.430,0.632]    | -0.261***<br>[-0.381,-0.141] | -0.368***<br>[-0.459,-0.276] | -0.527***<br>[-0.662,-0.391] | -0.169***<br>[-0.207,-0.131] | -0.174**<br>[-0.308,-0.041]  |
| HH_REL (ref: Catholic): Other Christian                                                                              | -0.117<br>[-0.267,0.032]           | -0.119<br>[-0.268,0.031]     | 0.036<br>[-0.093,0.164]      | -0.034<br>[-0.159,0.091]     | 0.001<br>[-0.112,0.113]      | -0.063<br>[-0.240,0.113]     | -0.029<br>[-0.079,0.021]     | -0.113<br>[-0.292,0.066]     |
| HH_REL (ref: Catholic): Islam                                                                                        | -0.407***<br>[-0.594,-0.219]       | -0.406***<br>[-0.593,-0.218] | 0.150*<br>[-0.009,0.309]     | -0.073<br>[-0.240,0.094]     | -0.041<br>[-0.182,0.100]     | -0.041<br>[-0.258,0.175]     | -0.033<br>[-0.094,0.029]     | -0.054<br>[-0.273,0.165]     |
| HH_REL (ref: Catholic): Traditionalist                                                                               | -0.530**<br>[-0.953,-0.107]        | -0.528**<br>[-0.951,-0.105]  | 0.952***<br>[0.582,1.322]    | -0.899***<br>[-1.369,-0.428] | -0.492***<br>[-0.864,-0.121] | -0.577***<br>[-0.985,-0.169] | -0.305***<br>[-0.421,-0.188] | -0.101<br>[-0.492,0.290]     |
| HH_REL (ref: Catholic): Other                                                                                        | -0.430<br>[-1.507,0.648]           | -0.433<br>[-1.508,0.641]     | -0.411<br>[-1.197,0.375]     | 0.109<br>[-1.200,1.418]      | 0.395<br>[-0.393,1.182]      | -0.065<br>[-1.222,1.093]     | -0.093<br>[-0.417,0.231]     | 0.670<br>[-0.529,1.868]      |
| HH_ETH (ref: Ekoi): Fulani                                                                                           | -0.669**<br>[-1.279,-0.059]        | -0.681**<br>[-1.292,-0.071]  | 0.762***<br>[0.276,1.248]    | 0.142<br>[-0.903,1.187]      | -0.693***<br>[-1.167,-0.219] | -0.693*<br>[-1.442,0.057]    | -0.300***<br>[-0.516,-0.085] | 0.219<br>[-0.607,1.046]      |
| HH_ETH (ref: Ekoi): Hausa                                                                                            | -0.527*<br>[-1.124,0.069]          | -0.537*<br>[-1.134,0.061]    | 0.919***<br>[0.440,1.397]    | -0.152<br>[-1.158,0.854]     | -0.675***<br>[-1.140,-0.210] | -0.249<br>[-0.995,0.496]     | -0.149<br>[-0.363,0.065]     | -0.066<br>[-0.888,0.757]     |
| HH_ETH (ref: Ekoi): Ibibio                                                                                           | -0.385<br>[-1.021,0.251]           | -0.388<br>[-1.025,0.248]     | 0.236<br>[-0.298,0.770]      | 0.322<br>[-0.712,1.356]      | -0.106<br>[-0.620,0.407]     | -0.354<br>[-1.185,0.477]     | -0.180<br>[-0.418,0.057]     | -0.203<br>[-1.114,0.707]     |
| HH_ETH (ref: Ekoi): Igala                                                                                            | -0.482<br>[-1.206,0.241]           | -0.492<br>[-1.215,0.232]     | 0.020<br>[-0.569,0.609]      | 0.699<br>[-0.330,1.729]      | -0.098<br>[-0.643,0.448]     | -0.410<br>[-1.317,0.498]     | 0.190<br>[-0.070,0.451]      | 0.130<br>[-0.847,1.108]      |
| HH_ETH (ref: Ekoi): Igbo                                                                                             | -0.167<br>[-0.751,0.417]           | -0.167<br>[-0.752,0.418]     | -0.526**<br>[-1.007,-0.045]  | 1.189**<br>[0.223,2.156]     | -0.333<br>[-0.792,0.125]     | 0.831**<br>[0.082,1.581]     | -0.034<br>[-0.249,0.181]     | 0.017<br>[-0.821,0.855]      |
| HH_ETH (ref: Ekoi): Ijaw / Izon                                                                                      | -0.302<br>[-0.987,0.384]           | -0.306<br>[-0.992,0.380]     | 0.708**<br>[0.147,1.269]     | -0.017<br>[-1.095,1.060]     | -0.599**<br>[-1.143,-0.056]  | -0.842*<br>[-1.688,0.005]    | -0.163<br>[-0.404,0.078]     | 0.490<br>[-0.445,1.425]      |
| HH_ETH (ref: Ekoi): Kanuri / Beriberi                                                                                | -0.488<br>[-1.194,0.218]           | -0.497<br>[-1.203,0.209]     | 1.038***<br>[0.495,1.581]    | -0.045<br>[-1.336,1.246]     | -0.887***<br>[-1.415,-0.359] | -0.382<br>[-1.176,0.412]     | -0.149<br>[-0.378,0.079]     | -0.082<br>[-0.945,0.780]     |
| HH_ETH (ref: Ekoi): Tiv                                                                                              | -0.357<br>[-1.084,0.369]           | -0.373<br>[-1.100,0.354]     | -0.297<br>[-0.841,0.248]     | 0.992*<br>[-0.036,2.020]     | 0.087<br>[-0.447,0.621]      | -0.814*<br>[-1.670,0.042]    | -0.362***<br>[-0.608,-0.116] | 0.209<br>[-0.722,1.139]      |
| HH_ETH (ref: Ekoi): Yoruba                                                                                           | -0.230<br>[-0.826,0.365]           | -0.238<br>[-0.834,0.358]     | 0.291<br>[-0.194,0.776]      | 0.702<br>[-0.273,1.677]      | -0.428*<br>[-0.894,0.038]    | 1.347***<br>[0.589,2.104]    | 0.048<br>[-0.169,0.266]      | 0.139<br>[-0.710,0.988]      |
| HH_ETH (ref: Ekoi): Other                                                                                            | -0.393<br>[-0.958,0.171]           | -0.395<br>[-0.960,0.170]     | 0.372<br>[-0.083,0.828]      | 0.595<br>[-0.372,1.561]      | -0.317<br>[-0.761,0.126]     | -0.007<br>[-0.731,0.717]     | -0.006<br>[-0.214,0.202]     | -0.023<br>[-0.831,0.786]     |

|                              |                 |                 |                 |                 |                 |                 |                 |                |
|------------------------------|-----------------|-----------------|-----------------|-----------------|-----------------|-----------------|-----------------|----------------|
| HH_SIZ                       | -0.016**        | -0.016**        | 0.033***        | -0.014*         | -0.022***       | -0.039***       | -0.007***       | 0.137***       |
|                              | [-0.030,-0.003] | [-0.030,-0.003] | [0.023,0.043]   | [-0.029,0.001]  | [-0.032,-0.013] | [-0.052,-0.027] | [-0.011,-0.004] | [0.123,0.152]  |
| HH_WEA                       | 0.141***        | 0.140***        | -0.204***       | 0.108***        | 0.131***        | 0.276***        | 0.058***        | 0.008          |
|                              | [0.120,0.163]   | [0.118,0.161]   | [-0.221,-0.186] | [0.086,0.130]   | [0.115,0.147]   | [0.253,0.299]   | [0.051,0.064]   | [-0.014,0.030] |
| YEAR (ref. 2003): 2008       | 0.517***        | 0.495***        | 0.040           | -0.251**        | 0.087           | -0.670***       | -0.108***       | 0.323***       |
|                              | [0.235,0.799]   | [0.211,0.778]   | [-0.156,0.236]  | [-0.472,-0.030] | [-0.097,0.270]  | [-0.921,-0.420] | [-0.180,-0.037] | [0.097,0.549]  |
| YEAR (ref. 2003): 2013       | 0.673***        | 0.635***        | -0.042          | -0.388***       | 0.170*          | -0.314**        | -0.029          | 0.547***       |
|                              | [0.394,0.952]   | [0.353,0.916]   | [-0.237,0.153]  | [-0.607,-0.169] | [-0.011,0.351]  | [-0.563,-0.065] | [-0.100,0.043]  | [0.313,0.780]  |
| YEAR (ref. 2003): 2018       | 0.800***        | 0.890***        | -0.267***       | -0.385***       | 0.391***        | -1.272***       | -0.059          | 0.314***       |
|                              | [0.512,1.087]   | [0.603,1.177]   | [-0.468,-0.066] | [-0.617,-0.153] | [0.203,0.578]   | [-1.530,-1.013] | [-0.133,0.016]  | [0.094,0.535]  |
| Observations                 | 24381           | 24381           | 34713           | 34713           | 34713           | 35019           | 36585           | 52431          |
| Akaike Information Criterion | 18032.806       | 18053.939       | 26153.968       | 17075.688       | 29973.334       | 192578.24       | 111031.373      | 24062.176      |
| Prob. > $\chi^2$             | <0.001          | <0.001          | <0.001          | <0.001          | <0.001          | <0.001          | <0.001          | <0.001         |
| Hausman test                 | 0.068           | 0.023           | <0.001          | <0.001          | <0.001          | <0.001          | <0.001          | <0.001         |

95% confidence intervals in brackets. 774 LGA-level fixed effects estimators omitted from reporting.

\* p < 0.10, \*\* p < 0.05, \*\*\* p < 0.01
