# Supplementary material for: Impact and effect mechanisms of mass campaigns in resource-constrained health systems: quasi-experimental evidence from polio eradication in Nigeria
Source: HighWire-hosted journal article supplement (doi:10.1136/bmjgh-2020-004248), 2021-03-01
Supplement: bmjgh-2020-004248supp008_data_supplement.pdf [file bmjgh-2020-004248supp008_data_supplement.pdf]

Table 7: Detailed results: Link between SIA exposure and child/maternal health outcomes, stratified by region.

| North Central                                    | Non-polio full immunisation               |                                          | Delivery                                  |                                           |                                           | Antenatal care                            |                                           | Child survival                            |                                           |
|--------------------------------------------------|-------------------------------------------|------------------------------------------|-------------------------------------------|-------------------------------------------|-------------------------------------------|-------------------------------------------|-------------------------------------------|-------------------------------------------|-------------------------------------------|
|                                                  | Full model                                | Interaction model (EXPxAGE)              | At home                                   | At private facility                       | At public facility                        | No. of antenatal care visits              | No. of tetanus injections                 | Exposure decomposition                    | Total exposure                            |
| EXP_CHI                                          | 0.026 <sup>*</sup><br>[-0.004, 0.056]     | 0.054 <sup>**</sup><br>[0.009, 0.100]    |                                           |                                           |                                           |                                           |                                           |                                           |                                           |
| EXPxAGE                                          |                                           | -0.001 <sup>**</sup><br>[-0.002, -0.000] |                                           |                                           |                                           |                                           |                                           |                                           |                                           |
| EXP_PREG                                         |                                           |                                          | 0.003<br>[-0.036, 0.042]                  | -0.015<br>[-0.061, 0.031]                 | 0.002<br>[-0.034, 0.038]                  | 0.034<br>[-0.030, 0.097]                  | 0.003<br>[-0.015, 0.021]                  |                                           |                                           |
| EXP_PREG_nod<br>(date approximation)             |                                           |                                          |                                           |                                           |                                           |                                           |                                           | -0.019<br>[-0.076, 0.037]                 |                                           |
| EXP_CHI_nod<br>(date approximation)              |                                           |                                          |                                           |                                           |                                           |                                           |                                           | 0.030 <sup>*</sup><br>[-0.001, 0.061]     |                                           |
| EXP_TOT_nod (total exposure, date approximation) |                                           |                                          |                                           |                                           |                                           |                                           |                                           |                                           | 0.018<br>[-0.008, 0.044]                  |
| CHI_AGE                                          | 0.056 <sup>***</sup><br>[0.025, 0.087]    | 0.017 <sup>**</sup><br>[0.001, 0.033]    |                                           |                                           |                                           |                                           |                                           | -0.003<br>[-0.027, 0.022]                 | -0.005<br>[-0.029, 0.018]                 |
| CHI_AGE2                                         | -0.001 <sup>***</sup><br>[-0.001, -0.000] |                                          |                                           |                                           |                                           |                                           |                                           | 0.000                                     | 0.000                                     |
| CHI_ORD                                          | -0.035<br>[-0.088, 0.019]                 | -0.034<br>[-0.087, 0.019]                |                                           |                                           |                                           |                                           |                                           | -0.157 <sup>***</sup><br>[-0.220, -0.095] | -0.158 <sup>***</sup><br>[-0.221, -0.095] |
| CHI_SEX                                          | -0.077<br>[-0.230, 0.077]                 | -0.075<br>[-0.228, 0.079]                |                                           |                                           |                                           |                                           |                                           | 0.217 <sup>**</sup><br>[0.031, 0.404]     | 0.218 <sup>**</sup><br>[0.032, 0.405]     |
| MOT_ANC                                          | 0.093 <sup>***</sup><br>[0.071, 0.115]    | 0.094 <sup>***</sup><br>[0.072, 0.115]   | -0.161 <sup>***</sup><br>[-0.181, -0.142] | 0.061 <sup>***</sup><br>[0.043, 0.080]    | 0.083 <sup>***</sup><br>[0.067, 0.100]    |                                           |                                           | 0.004                                     | 0.004                                     |
| MOT_EDM                                          | 0.070 <sup>***</sup><br>[0.035, 0.104]    | 0.070 <sup>***</sup><br>[0.035, 0.104]   | -0.057 <sup>***</sup><br>[-0.085, -0.029] | 0.060 <sup>***</sup><br>[0.025, 0.096]    | 0.031 <sup>**</sup><br>[0.004, 0.059]     | 0.105 <sup>***</sup><br>[0.059, 0.151]    | 0.028 <sup>***</sup><br>[0.012, 0.043]    | 0.021                                     | 0.021                                     |
| MOT_EDF                                          | 0.005<br>[-0.032, 0.042]                  | 0.005<br>[-0.031, 0.042]                 | -0.024<br>[-0.053, 0.005]                 | 0.029<br>[-0.008, 0.067]                  | 0.023<br>[-0.005, 0.052]                  | 0.053 <sup>***</sup><br>[0.016, 0.091]    | 0.008<br>[-0.008, 0.025]                  | 0.010                                     | 0.010                                     |
| MOT_AWE                                          | 2.554 <sup>***</sup><br>[2.315, 2.793]    | 2.547 <sup>***</sup><br>[2.309, 2.786]   | -0.660 <sup>***</sup><br>[-0.809, -0.510] | -0.092<br>[-0.287, 0.102]                 | 0.863 <sup>***</sup><br>[0.709, 1.018]    | 1.760 <sup>***</sup><br>[1.484, 2.035]    | 0.614 <sup>***</sup><br>[0.527, 0.701]    |                                           |                                           |
| MOT_AGE                                          | 0.016 <sup>*</sup><br>[-0.001, 0.034]     | 0.016 <sup>*</sup><br>[-0.001, 0.034]    | 0.005<br>[-0.005, 0.015]                  | -0.003<br>[-0.016, 0.009]                 | -0.003<br>[-0.013, 0.006]                 | 0.026 <sup>***</sup><br>[0.010, 0.043]    | 0.004<br>[-0.002, 0.010]                  | 0.010                                     | 0.010                                     |
| HH_RUR                                           | -0.035<br>[-0.257, 0.186]                 | -0.033<br>[-0.255, 0.188]                | 0.750 <sup>***</sup><br>[0.553, 0.946]    | -0.405 <sup>***</sup><br>[-0.623, -0.187] | -0.425 <sup>***</sup><br>[-0.599, -0.251] | -0.559 <sup>**</sup><br>[-1.103, -0.014]  | -0.096 <sup>*</sup><br>[-0.201, 0.009]    | -0.079                                    | -0.081                                    |
| HH_REL (ref: Catholic): Other Christian          | -0.105<br>[-0.373, 0.163]                 | -0.105<br>[-0.373, 0.163]                | 0.104<br>[-0.115, 0.324]                  | 0.006<br>[-0.235, 0.246]                  | -0.106<br>[-0.316, 0.105]                 | 0.160<br>[-0.217, 0.536]                  | 0.037<br>[-0.096, 0.170]                  | 0.164                                     | 0.165                                     |
| HH_REL (ref: Catholic): Islam                    | -0.371 <sup>**</sup><br>[-0.674, -0.069]  | -0.370 <sup>**</sup><br>[-0.673, -0.068] | 0.095<br>[-0.160, 0.350]                  | 0.000<br>[-0.289, 0.290]                  | -0.094<br>[-0.331, 0.143]                 | 0.612 <sup>***</sup><br>[0.149, 1.074]    | -0.069<br>[-0.232, 0.094]                 | 0.118                                     | 0.117                                     |
| HH_REL (ref: Catholic): Traditionalist           | -0.719<br>[-1.837, 0.399]                 | -0.695<br>[-1.811, 0.421]                | 0.277<br>[-0.415, 0.969]                  | -0.011<br>[-0.861, 0.839]                 | -0.612<br>[-1.424, 0.201]                 | -0.985 <sup>***</sup><br>[-1.728, -0.243] | -0.625 <sup>***</sup><br>[-0.918, -0.331] | 0.422                                     | 0.428                                     |
| HH_REL (ref: Catholic): Other                    | 0.000<br>[0.000, 0.000]                   | 0.000<br>[0.000, 0.000]                  | -0.391<br>[-1.789, 1.007]                 | 0.960<br>[-0.656, 2.575]                  | -0.172<br>[-1.783, 1.438]                 | -0.750<br>[-2.634, 1.134]                 | -0.409<br>[-1.097, 0.280]                 | 0.022                                     | 0.015                                     |
| HH_ETH (ref: Ekoi): Fulani                       | -0.085<br>[-0.632, 0.462]                 | -0.065<br>[-0.611, 0.481]                | 0.749 <sup>***</sup><br>[0.286, 1.212]    | -1.294 <sup>***</sup><br>[-2.219, -0.368] | -0.500 <sup>**</sup><br>[-0.939, -0.061]  | 0.000<br>[0.000, 0.000]                   | 0.000<br>[0.000, 0.000]                   | 0.364                                     | 0.370                                     |
| HH_ETH (ref: Ekoi): Hausa                        | -0.492 <sup>**</sup><br>[-0.881, -0.104]  | -0.489 <sup>**</sup><br>[-0.877, -0.101] | 0.854 <sup>***</sup><br>[0.538, 1.170]    | -0.647 <sup>***</sup><br>[-1.117, -0.177] | -0.546 <sup>***</sup><br>[-0.850, -0.243] | 0.657 <sup>*</sup><br>[-0.026, 1.340]     | 0.305 <sup>**</sup><br>[0.031, 0.580]     | 0.079                                     | 0.078                                     |
| HH_ETH (ref: Ekoi): Ibibio                       | -0.624<br>[-2.729, 1.481]                 | -0.628<br>[-2.732, 1.477]                | -0.658<br>[-2.862, 1.546]                 | 0.903<br>[-0.485, 2.291]                  | -0.511<br>[-1.878, 0.856]                 | 1.908 <sup>***</sup><br>[0.643, 3.172]    | 0.364<br>[-0.234, 0.962]                  | 0.000                                     | 0.000                                     |
| HH_ETH (ref: Ekoi): Igala                        | -0.139<br>[-0.531, 0.253]                 | -0.141<br>[-0.533, 0.251]                | -0.579 <sup>***</sup><br>[-0.962, -0.195] | 0.276<br>[-0.102, 0.653]                  | 0.418 <sup>***</sup><br>[0.102, 0.733]    | 1.477 <sup>***</sup><br>[0.605, 2.349]    | 0.848 <sup>***</sup><br>[0.551, 1.145]    | 0.019                                     | 0.015                                     |
| HH_ETH (ref: Ekoi): Igbo                         | -0.163<br>[-0.689, 0.364]                 | -0.151<br>[-0.677, 0.374]                | -1.009 <sup>***</sup><br>[-1.546, -0.471] | 0.672 <sup>***</sup><br>[0.274, 1.069]    | 0.025<br>[-0.341, 0.391]                  | 1.672 <sup>***</sup><br>[0.809, 2.535]    | 0.249 <sup>*</sup><br>[-0.043, 0.541]     | 0.217                                     | 0.214                                     |
| HH_ETH (ref: Ekoi): Ijaw / Izon                  | 0.000<br>[0.000, 0.000]                   | 0.000<br>[0.000, 0.000]                  | 0.000<br>[0.000, 0.000]                   | 0.000<br>[0.000, 0.000]                   | 0.000<br>[0.000, 0.000]                   | -1.779<br>[-4.231, 0.674]                 | 0.427 <sup>**</sup><br>[0.080, 0.774]     | 0.000                                     | 0.000                                     |
| HH_ETH (ref: Ekoi): Kanuri / Beriberi            | -0.722<br>[-2.342, 0.898]                 | -0.707<br>[-2.327, 0.913]                | 0.647<br>[-0.406, 1.701]                  | 0.100<br>[-1.070, 1.270]                  | -0.611<br>[-1.666, 0.444]                 | 2.708 <sup>**</sup><br>[0.535, 4.880]     | 0.213<br>[-0.284, 0.710]                  | -0.902 <sup>*</sup><br>[-1.967, 0.162]    | -0.888<br>[-1.952, 0.176]                 |
| HH_ETH (ref: Ekoi): Tiv                          | -0.116<br>[-0.491, 0.260]                 | -0.118<br>[-0.493, 0.257]                | -0.808 <sup>***</sup><br>[-1.135, -0.481] | 0.945 <sup>***</sup><br>[0.578, 1.312]    | 0.095<br>[-0.207, 0.398]                  | 0.824 <sup>**</sup><br>[0.013, 1.635]     | 0.218 <sup>*</sup><br>[-0.009, 0.445]     | 0.088                                     | 0.084                                     |
| HH_ETH (ref: Ekoi): Yoruba                       | 0.183<br>[-0.145, 0.511]                  | 0.191<br>[-0.137, 0.518]                 | -0.267<br>[-0.587, 0.052]                 | 0.600 <sup>***</sup><br>[0.297, 0.904]    | -0.310 <sup>**</sup><br>[-0.568, -0.051]  | 2.871 <sup>***</sup><br>[2.117, 3.624]    | 0.472 <sup>***</sup><br>[0.214, 0.731]    | 0.301                                     | 0.305                                     |
| HH_ETH (ref: Ekoi): Other                        | 0.000<br>[0.000, 0.000]                   | 0.000<br>[0.000, 0.000]                  | 0.000<br>[0.000, 0.000]                   | 0.000<br>[0.000, 0.000]                   | 0.000<br>[0.000, 0.000]                   | 1.335 <sup>***</sup><br>[0.666, 2.004]    | 0.516 <sup>***</sup><br>[0.319, 0.713]    | 0.000                                     | 0.000                                     |
| HH_SIZ                                           | -0.012<br>[-0.037, 0.014]                 | -0.012<br>[-0.038, 0.013]                | 0.007<br>[-0.012, 0.025]                  | 0.003<br>[-0.020, 0.027]                  | -0.007<br>[-0.026, 0.011]                 | -0.067 <sup>***</sup><br>[-0.098, -0.036] | -0.014 <sup>***</sup><br>[-0.022, -0.005] | 0.113 <sup>***</sup><br>[0.076, 0.149]    | 0.113 <sup>***</sup><br>[0.076, 0.150]    |
|                                                  | 0.150 <sup>***</sup>                      | 0.149 <sup>***</sup>                     | -0.182 <sup>***</sup>                     | 0.088 <sup>***</sup>                      | 0.116 <sup>***</sup>                      | 0.304 <sup>***</sup>                      | 0.055 <sup>***</sup>                      | 0.015                                     | 0.015                                     |

|                                            |                  |                  |                  |                  |                  |                            |                            |                 |                 |
|--------------------------------------------|------------------|------------------|------------------|------------------|------------------|----------------------------|----------------------------|-----------------|-----------------|
| HH_WEA                                     | [0.107, 0.193]   | [0.106, 0.192]   | [-0.218, -0.146] | [0.046, 0.129]   | [0.082, 0.149]   | [0.225, 0.384]             | [0.032, 0.078]             | [-0.035, 0.065] | [-0.036, 0.065] |
|                                            | 0.988***         | 0.989***         | -0.331*          | -0.344*          | 0.562***         | -1.690***                  | -0.205                     | 0.183           | 0.170           |
| YEAR (ref: 2003): 2008                     | [0.475, 1.501]   | [0.474, 1.504]   | [-0.691, 0.029]  | [-0.742, 0.053]  | [0.209, 0.915]   | [-2.851, -0.529]           | [-0.486, 0.077]            | [-0.301, 0.667] | [-0.314, 0.653] |
|                                            | 0.818***         | 0.837***         | -0.433**         | -0.216           | 0.537***         | -1.049*                    | -0.120                     | 0.412           | 0.406           |
| YEAR (ref: 2003): 2013                     | [0.311, 1.326]   | [0.328, 1.345]   | [-0.792, -0.075] | [-0.607, 0.175]  | [0.189, 0.886]   | [-2.289, 0.191]            | [-0.393, 0.153]            | [-0.093, 0.917] | [-0.098, 0.911] |
|                                            | 1.134***         | 1.183***         | -0.775***        | -0.072           | 0.787***         | -2.272***                  | -0.304**                   | 0.398           | 0.376           |
| YEAR (ref: 2003): 2018                     | [0.609, 1.659]   | [0.660, 1.707]   | [-1.150, -0.400] | [-0.488, 0.343]  | [0.421, 1.153]   | [-3.442, -1.101]           | [-0.579, -0.030]           | [-0.090, 0.886] | [-0.111, 0.863] |
|                                            | -5.527***        | -5.158***        | 1.901***         | -2.371***        | -2.459***        | 1.800***                   | 0.579***                   | 1.877***        | 1.829***        |
| Constant                                   | [-6.348, -4.707] | [-5.930, -4.386] | [1.358, 2.444]   | [-3.004, -1.737] | [-2.986, -1.932] | [0.559, 3.042]             | [0.175, 0.983]             | [1.097, 2.657]  | [1.053, 2.606]  |
|                                            | 0.172***         | 0.172***         | 0.338***         | 0.410***         | 0.186***         | 0.030                      | -1.683***                  | 0.000           | 0.000           |
| Multilevel variance parameter: Level 1     | [0.066, 0.279]   | [0.066, 0.278]   | [0.185, 0.490]   | [0.193, 0.628]   | [0.090, 0.283]   | [-0.159, 0.219]            | [-2.031, -1.334]           | [-0.000, 0.000] | [-0.000, 0.000] |
| Multilevel variance parameter:<br>Residual |                  |                  |                  |                  |                  | 1.263***<br>[1.193, 1.333] | 0.254***<br>[0.199, 0.309] |                 |                 |
| Observations (Level 2)                     | 4342             | 4342             | 6071             | 6071             | 6071             | 6103                       | 6293                       | 9028            | 9028            |
| Observations (Level 1)                     | 113              | 113              | 113              | 113              | 113              | 113                        | 113                        | 113             | 113             |
| Akaike Information Criterion               | 4152.478         | 4159.676         | 6199.652         | 4691.431         | 6657.883         | 32962.923                  | 21185.627                  | 3710.053        | 3710.113        |
| Prob. > $\chi^2$                           | <0.001           | <0.001           | <0.001           | <0.001           | <0.001           | <0.001                     | <0.001                     | <0.001          | <0.001          |

| North East                                       | Non-polio full immunisation   |                               | Delivery                      |                            |                               | Antenatal care                |                               | Child survival                |                               |
|--------------------------------------------------|-------------------------------|-------------------------------|-------------------------------|----------------------------|-------------------------------|-------------------------------|-------------------------------|-------------------------------|-------------------------------|
|                                                  | Full model                    | Interaction model (EXPxAGE)   | At home                       | At private facility        | At public facility            | No. of antenatal care visits  | No. of tetanus injections     | Exposure decomposition        | Total exposure                |
| EXP_CHI                                          | -0.074***<br>[-0.106, -0.042] | -0.058**<br>[-0.104, -0.013]  |                               |                            |                               |                               |                               |                               |                               |
| EXPxAGE                                          |                               | 0.000<br>[-0.001, 0.001]      |                               |                            |                               |                               |                               |                               |                               |
| EXP_PREG                                         |                               |                               | -0.025<br>[-0.067, 0.017]     | 0.024<br>[-0.103, 0.151]   | 0.018<br>[-0.024, 0.060]      | 0.015<br>[-0.026, 0.055]      | 0.001<br>[-0.017, 0.019]      |                               |                               |
| EXP_PREG_nod<br>(date approximation)             |                               |                               |                               |                            |                               |                               |                               | 0.019<br>[-0.022, 0.060]      |                               |
| EXP_CHI_nod<br>(date approximation)              |                               |                               |                               |                            |                               |                               |                               | 0.005<br>[-0.020, 0.029]      |                               |
| EXP_TOT_nod (total exposure, date approximation) |                               |                               |                               |                            |                               |                               |                               |                               | 0.008<br>[-0.013, 0.030]      |
| CHI_AGE                                          | 0.085***<br>[0.043, 0.128]    | 0.054***<br>[0.032, 0.077]    |                               |                            |                               |                               |                               | -0.014<br>[-0.035, 0.008]     | -0.014<br>[-0.035, 0.007]     |
| CHI_AGE2                                         | -0.001*<br>[-0.001, 0.000]    |                               |                               |                            |                               |                               |                               | 0.000<br>[-0.000, 0.000]      | 0.000<br>[-0.000, 0.000]      |
| CHI_ORD                                          | -0.072**<br>[-0.135, -0.010]  | -0.073**<br>[-0.136, -0.011]  |                               |                            |                               |                               |                               | -0.139***<br>[-0.186, -0.093] | -0.139***<br>[-0.186, -0.093] |
| CHI_SEX                                          | 0.026<br>[-0.163, 0.215]      | 0.024<br>[-0.165, 0.213]      |                               |                            |                               |                               |                               | 0.271***<br>[0.121, 0.421]    | 0.271***<br>[0.121, 0.420]    |
| MOT_ANC                                          | 0.144***<br>[0.109, 0.179]    | 0.144***<br>[0.109, 0.179]    | -0.218***<br>[-0.244, -0.192] | 0.134***<br>[0.069, 0.200] | 0.203***<br>[0.178, 0.229]    |                               |                               | 0.003<br>[-0.026, 0.031]      | 0.003<br>[-0.026, 0.031]      |
| MOT_EDM                                          | 0.072***<br>[0.030, 0.115]    | 0.071***<br>[0.029, 0.114]    | -0.083***<br>[-0.114, -0.051] | 0.120***<br>[0.030, 0.210] | 0.072***<br>[0.040, 0.104]    | 0.092***<br>[0.054, 0.130]    | 0.030***<br>[0.016, 0.044]    | -0.009<br>[-0.050, 0.031]     | -0.009<br>[-0.049, 0.031]     |
| MOT_EDF                                          | 0.006<br>[-0.036, 0.048]      | 0.006<br>[-0.036, 0.047]      | -0.028*<br>[-0.059, 0.003]    | 0.020<br>[-0.072, 0.112]   | 0.031*<br>[-0.000, 0.062]     | 0.104***<br>[0.071, 0.137]    | 0.029***<br>[0.013, 0.044]    | 0.038**<br>[0.002, 0.074]     | 0.038**<br>[0.003, 0.074]     |
| MOT_AWE                                          | 2.870***<br>[2.563, 3.177]    | 2.872***<br>[2.565, 3.179]    | -0.834***<br>[-0.998, -0.669] | 0.801***<br>[0.290, 1.311] | 0.806***<br>[0.640, 0.973]    | 1.847***<br>[1.626, 2.068]    | 0.740***<br>[0.663, 0.818]    |                               |                               |
| MOT_AGE                                          | 0.031***<br>[0.008, 0.055]    | 0.031***<br>[0.007, 0.055]    | 0.007<br>[-0.004, 0.019]      | 0.012<br>[-0.021, 0.046]   | -0.009<br>[-0.021, 0.003]     | 0.001<br>[-0.009, 0.010]      | 0.000<br>[-0.003, 0.004]      | 0.008<br>[-0.010, 0.026]      | 0.008<br>[-0.010, 0.026]      |
| HH_RUR                                           | -0.159<br>[-0.433, 0.115]     | -0.161<br>[-0.435, 0.114]     | 0.601***<br>[0.388, 0.814]    | 0.123<br>[-0.501, 0.748]   | -0.609***<br>[-0.817, -0.400] | -0.671***<br>[-1.014, -0.328] | -0.312***<br>[-0.443, -0.182] | -0.191<br>[-0.432, 0.050]     | -0.190<br>[-0.430, 0.051]     |
| HH_REL (ref: Catholic): Other Christian          | -0.546<br>[-1.203, 0.112]     | -0.558*<br>[-1.214, 0.098]    | -0.366<br>[-0.866, 0.133]     | 0.534<br>[-0.444, 1.512]   | 0.338<br>[-0.160, 0.836]      | 0.285<br>[-0.279, 0.848]      | 0.114<br>[-0.088, 0.315]      | -0.898**<br>[-1.663, -0.132]  | -0.895**<br>[-1.661, -0.129]  |
| HH_REL (ref: Catholic): Islam                    | -1.072***<br>[-1.741, -0.402] | -1.088***<br>[-1.756, -0.420] | -0.018<br>[-0.531, 0.495]     | 0.105<br>[-0.941, 1.151]   | 0.051<br>[-0.460, 0.562]      | 0.073<br>[-0.518, 0.663]      | 0.050<br>[-0.159, 0.260]      | -0.776**<br>[-1.548, -0.004]  | -0.772**<br>[-1.544, -0.000]  |
| HH_REL (ref: Catholic): Traditionalist           | -1.618**<br>[-3.129, -0.107]  | -1.630**<br>[-3.136, -0.124]  | 0.789<br>[-0.463, 2.042]      | 0.000<br>[0.000, 0.000]    | -0.609<br>[-1.842, 0.624]     | -0.676*<br>[-1.376, 0.024]    | -0.263<br>[-0.583, 0.056]     | -0.562<br>[-1.751, 0.628]     | -0.560<br>[-1.749, 0.629]     |
| HH_REL (ref: Catholic): Other                    | 0.000<br>[0.000, 0.000]       | 0.000<br>[0.000, 0.000]       | 0.000<br>[0.000, 0.000]       | 0.000<br>[0.000, 0.000]    | 0.000<br>[0.000, 0.000]       | -2.056***<br>[-2.585, -1.526] | -0.787***<br>[-0.978, -0.596] | 0.000<br>[0.000, 0.000]       | 0.000<br>[0.000, 0.000]       |
| HH_ETH (ref: Ekoi): Fulani                       | -0.057<br>[-0.358, 0.245]     | -0.065<br>[-0.366, 0.236]     | -0.039<br>[-0.265, 0.188]     | 0.172<br>[-0.518, 0.861]   | 0.026<br>[-0.201, 0.253]      | 0.000<br>[0.000, 0.000]       | 0.000<br>[0.000, 0.000]       | 0.172<br>[-0.049, 0.393]      | 0.172<br>[-0.049, 0.393]      |
| HH_ETH (ref: Ekoi): Hausa                        | -0.078<br>[-0.382, 0.226]     | -0.082<br>[-0.387, 0.222]     | 0.209*<br>[-0.019, 0.438]     | -0.302<br>[-1.060, 0.455]  | -0.168<br>[-0.396, 0.059]     | 0.552***<br>[0.197, 0.907]    | 0.128**<br>[0.025, 0.231]     | 0.005<br>[-0.224, 0.234]      | 0.004<br>[-0.224, 0.233]      |
| HH_ETH (ref: Ekoi): Ibibio                       | 0.000<br>[0.000, 0.000]       | 0.000<br>[0.000, 0.000]       | 0.000<br>[0.000, 0.000]       | 0.000<br>[0.000, 0.000]    | 0.000<br>[0.000, 0.000]       | -1.698***<br>[-2.025, -1.371] | -0.297***<br>[-0.447, -0.146] | 0.000<br>[0.000, 0.000]       | 0.000<br>[0.000, 0.000]       |
| HH_ETH (ref: Ekoi): Igala                        | 0.000<br>[0.000, 0.000]       | 0.000<br>[0.000, 0.000]       | -0.981<br>[-3.004, 1.041]     | 2.001<br>[-1.253, 5.254]   | 0.221<br>[-1.710, 2.152]      | 0.707<br>[-1.352, 2.765]      | 0.077<br>[-0.733, 0.888]      | -1.173<br>[-3.300, 0.954]     | -1.184<br>[-3.311, 0.943]     |
| HH_ETH (ref: Ekoi): Igbo                         | 0.487<br>[-1.189, 2.162]      | 0.501<br>[-1.172, 2.174]      | 0.000<br>[0.000, 0.000]       | 1.367**<br>[0.048, 2.687]  | 0.292<br>[-0.831, 1.415]      | 3.466***<br>[1.887, 5.045]    | 0.444**<br>[0.091, 0.796]     | -0.922<br>[-2.188, 0.343]     | -0.925<br>[-2.191, 0.341]     |
| HH_ETH (ref: Ekoi): Ijaw / Izon                  |                               |                               |                               |                            |                               |                               |                               |                               |                               |
| HH_ETH (ref: Ekoi): Kanuri / Beriberi            | -0.220<br>[-0.684, 0.245]     | -0.218<br>[-0.683, 0.246]     | 0.454***<br>[0.124, 0.784]    | -0.625<br>[-1.938, 0.688]  | -0.405**<br>[-0.732, -0.078]  | -0.059<br>[-0.373, 0.255]     | -0.021<br>[-0.149, 0.107]     | 0.121<br>[-0.183, 0.425]      | 0.123<br>[-0.181, 0.426]      |
| HH_ETH (ref: Ekoi): Tiv                          | -0.200<br>[-1.146, 0.746]     | -0.236<br>[-1.182, 0.710]     | -1.446***<br>[-2.017, -0.874] | -0.044<br>[-1.268, 1.180]  | 1.613***<br>[1.035, 2.191]    | -0.345<br>[-1.423, 0.733]     | -0.123<br>[-0.585, 0.340]     | 0.065<br>[-0.716, 0.847]      | 0.069<br>[-0.712, 0.851]      |
| HH_ETH (ref: Ekoi): Yoruba                       | 0.351<br>[-1.116, 1.818]      | 0.367<br>[-1.095, 1.829]      | -0.990<br>[-2.250, 0.270]     | 1.845**<br>[0.224, 3.467]  | 0.112<br>[-1.022, 1.245]      | 0.855<br>[-1.072, 2.783]      | 0.000<br>[-0.583, 0.584]      | 0.000<br>[0.000, 0.000]       | 0.000<br>[0.000, 0.000]       |

|                                            |                               |                               |                               |                               |                               |                               |                               |                            |                            |
|--------------------------------------------|-------------------------------|-------------------------------|-------------------------------|-------------------------------|-------------------------------|-------------------------------|-------------------------------|----------------------------|----------------------------|
| HH_ETH (ref: Ekoi): Other                  | 0.000<br>[0.000, 0.000]       | 0.000<br>[0.000, 0.000]       | 0.000<br>[0.000, 0.000]       | 0.000<br>[0.000, 0.000]       | 0.000<br>[0.000, 0.000]       | 0.415***<br>[0.151, 0.679]    | 0.191***<br>[0.085, 0.298]    | 0.000<br>[0.000, 0.000]    | 0.000<br>[0.000, 0.000]    |
| HH_SIZ                                     | -0.022*<br>[-0.047, 0.003]    | -0.021*<br>[-0.047, 0.004]    | 0.032***<br>[0.013, 0.051]    | -0.032<br>[-0.090, 0.027]     | -0.028***<br>[-0.046, -0.009] | -0.015*<br>[-0.033, 0.002]    | -0.007<br>[-0.016, 0.002]     | 0.096***<br>[0.071, 0.121] | 0.096***<br>[0.071, 0.121] |
| HH_WEA                                     | 0.103***<br>[0.050, 0.157]    | 0.103***<br>[0.049, 0.156]    | -0.237***<br>[-0.279, -0.196] | 0.040<br>[-0.073, 0.154]      | 0.230***<br>[0.188, 0.271]    | 0.240***<br>[0.185, 0.295]    | 0.071***<br>[0.051, 0.091]    | 0.033<br>[-0.015, 0.081]   | 0.033<br>[-0.015, 0.081]   |
| YEAR (ref: 2003): 2008                     | 0.788*<br>[-0.031, 1.608]     | 0.799*<br>[-0.024, 1.622]     | 0.726***<br>[0.299, 1.153]    | -1.900***<br>[-2.812, -0.988] | -0.354<br>[-0.790, 0.083]     | 0.217<br>[-0.214, 0.649]      | 0.109<br>[-0.068, 0.286]      | 0.097<br>[-0.318, 0.512]   | 0.108<br>[-0.305, 0.521]   |
| YEAR (ref: 2003): 2013                     | 1.338***<br>[0.525, 2.151]    | 1.358***<br>[0.542, 2.174]    | 0.396*<br>[-0.026, 0.818]     | -1.756***<br>[-2.679, -0.833] | -0.054<br>[-0.484, 0.377]     | 0.217<br>[-0.198, 0.632]      | 0.224**<br>[0.026, 0.421]     | 0.184<br>[-0.247, 0.615]   | 0.193<br>[-0.237, 0.623]   |
| YEAR (ref: 2003): 2018                     | 1.692***<br>[0.865, 2.518]    | 1.741***<br>[0.915, 2.568]    | 0.091<br>[-0.352, 0.534]      | -1.457***<br>[-2.441, -0.473] | 0.258<br>[-0.195, 0.711]      | -0.034<br>[-0.467, 0.400]     | 0.308***<br>[0.110, 0.505]    | 0.115<br>[-0.303, 0.532]   | 0.138<br>[-0.273, 0.548]   |
| Constant                                   | -5.962***<br>[-7.134, -4.790] | -5.653***<br>[-6.771, -4.535] | 2.646***<br>[1.930, 3.362]    | -5.294***<br>[-7.033, -3.555] | -2.948***<br>[-3.666, -2.230] | 1.088***<br>[0.398, 1.778]    | 0.410***<br>[0.106, 0.714]    | 3.024***<br>[2.074, 3.974] | 3.046***<br>[2.099, 3.993] |
| Multilevel variance parameter: Level 1     | 0.158**<br>[0.037, 0.278]     | 0.163***<br>[0.040, 0.286]    | 0.317***<br>[0.160, 0.475]    | 1.656***<br>[0.508, 2.804]    | 0.237***<br>[0.100, 0.374]    | -0.479***<br>[-0.643, -0.316] | -1.597***<br>[-1.924, -1.270] | 0.053*<br>[-0.007, 0.113]  | 0.052*<br>[-0.008, 0.112]  |
| Multilevel variance parameter:<br>Residual |                               |                               |                               |                               |                               | 0.924***<br>[0.864, 0.985]    | 0.079***<br>[0.035, 0.123]    |                            |                            |
| Observations (Level 2)                     | 5017                          | 5017                          | 7350                          | 7304                          | 7370                          | 7387                          | 7479                          | 11269                      | 11269                      |
| Observations (Level 1)                     | 100                           | 100                           | 100                           | 100                           | 100                           | 100                           | 100                           | 101                        | 101                        |
| Akaike Information Criterion               | 2854.824                      | 2857.651                      | 5075.901                      | 966.734                       | 5023.467                      | 34819.738                     | 22572.587                     | 5492.777                   | 5491.124                   |
| Prob. > $\chi^2$                           | <0.001                        | <0.001                        | <0.001                        | <0.001                        | <0.001                        | <0.001                        | <0.001                        | <0.001                     | <0.001                     |

| North West                                       | Non-polio full immunisation  |                             | Delivery                      |                               |                               | Antenatal care                |                               | Child survival                |                               |
|--------------------------------------------------|------------------------------|-----------------------------|-------------------------------|-------------------------------|-------------------------------|-------------------------------|-------------------------------|-------------------------------|-------------------------------|
|                                                  | Full model                   | Interaction model (EXPxAGE) | At home                       | At private facility           | At public facility            | No. of antenatal care visits  | No. of tetanus injections     | Exposure decomposition        | Total exposure                |
| EXP_CHI                                          | -0.076**<br>[-0.151, -0.002] | -0.034<br>[-0.110, 0.042]   |                               |                               |                               |                               |                               |                               |                               |
| EXPxAGE                                          |                              | -0.001*<br>[-0.002, 0.000]  |                               |                               |                               |                               |                               |                               |                               |
| EXP_PREG                                         |                              |                             | -0.015<br>[-0.067, 0.037]     | -0.059<br>[-0.197, 0.080]     | 0.025<br>[-0.028, 0.078]      | 0.025<br>[-0.005, 0.055]      | 0.002<br>[-0.013, 0.017]      |                               |                               |
| EXP_PREG_nod<br>(date approximation)             |                              |                             |                               |                               |                               |                               |                               | -0.008<br>[-0.051, 0.035]     |                               |
| EXP_CHI_nod<br>(date approximation)              |                              |                             |                               |                               |                               |                               |                               | 0.025<br>[-0.011, 0.060]      |                               |
| EXP_TOT_nod (total exposure, date approximation) |                              |                             |                               |                               |                               |                               |                               |                               | 0.013<br>[-0.019, 0.045]      |
| CHI_AGE                                          | 0.105***<br>[0.038, 0.172]   | 0.065***<br>[0.017, 0.114]  |                               |                               |                               |                               |                               | -0.047***<br>[-0.072, -0.021] | -0.043***<br>[-0.068, -0.018] |
| CHI_AGE2                                         | -0.001**<br>[-0.001, -0.000] |                             |                               |                               |                               |                               |                               | 0.000*<br>[-0.000, 0.001]     | 0.000**<br>[0.000, 0.001]     |
| CHI_ORD                                          | -0.063*<br>[-0.129, 0.002]   | -0.063*<br>[-0.129, 0.002]  |                               |                               |                               |                               |                               | -0.162***<br>[-0.200, -0.124] | -0.162***<br>[-0.200, -0.124] |
| CHI_SEX                                          | 0.045<br>[-0.154, 0.245]     | 0.045<br>[-0.154, 0.245]    |                               |                               |                               |                               |                               | 0.126**<br>[0.010, 0.241]     | 0.125**<br>[0.010, 0.241]     |
| MOT_ANC                                          | 0.063***<br>[0.026, 0.099]   | 0.063***<br>[0.027, 0.099]  | -0.203***<br>[-0.228, -0.178] | 0.221***<br>[0.147, 0.296]    | 0.188***<br>[0.162, 0.213]    |                               |                               | 0.015<br>[-0.009, 0.040]      | 0.015<br>[-0.009, 0.040]      |
| MOT_EDM                                          | 0.068***<br>[0.021, 0.114]   | 0.067***<br>[0.021, 0.114]  | -0.058***<br>[-0.091, -0.025] | 0.011<br>[-0.099, 0.120]      | 0.062***<br>[0.028, 0.095]    | 0.127***<br>[0.091, 0.163]    | 0.036***<br>[0.024, 0.049]    | 0.013<br>[-0.021, 0.048]      | 0.013<br>[-0.021, 0.048]      |
| MOT_EDF                                          | 0.029<br>[-0.013, 0.071]     | 0.029<br>[-0.013, 0.071]    | -0.007<br>[-0.039, 0.024]     | -0.043<br>[-0.158, 0.071]     | 0.017<br>[-0.015, 0.048]      | 0.106***<br>[0.083, 0.128]    | 0.034***<br>[0.026, 0.043]    | 0.043***<br>[0.016, 0.070]    | 0.043***<br>[0.015, 0.070]    |
| MOT_AWE                                          | 3.547***<br>[3.265, 3.828]   | 3.543***<br>[3.262, 3.824]  | -0.696***<br>[-0.864, -0.528] | 0.676**<br>[0.030, 1.323]     | 0.688***<br>[0.517, 0.858]    | 1.471***<br>[1.270, 1.673]    | 0.505***<br>[0.428, 0.582]    |                               |                               |
| MOT_AGE                                          | 0.037***<br>[0.012, 0.062]   | 0.037***<br>[0.012, 0.062]  | 0.007<br>[-0.004, 0.019]      | 0.003<br>[-0.036, 0.043]      | -0.009<br>[-0.021, 0.003]     | 0.004<br>[-0.003, 0.011]      | -0.002*<br>[-0.005, 0.000]    | 0.029***<br>[0.014, 0.044]    | 0.029***<br>[0.014, 0.044]    |
| HH_RUR                                           | -0.099<br>[-0.415, 0.218]    | -0.101<br>[-0.417, 0.215]   | 0.777***<br>[0.572, 0.982]    | -0.793**<br>[-1.465, -0.120]  | -0.765***<br>[-0.975, -0.555] | -0.776***<br>[-1.122, -0.429] | -0.260***<br>[-0.382, -0.139] | -0.131<br>[-0.317, 0.055]     | -0.133<br>[-0.319, 0.054]     |
| HH_REL (ref: Catholic): Other Christian          | 0.451<br>[-0.256, 1.157]     | 0.441<br>[-0.266, 1.147]    | -0.394<br>[-0.948, 0.160]     | -0.061<br>[-0.966, 0.845]     | 0.411<br>[-0.133, 0.955]      | 0.504<br>[-0.148, 1.156]      | 0.005<br>[-0.186, 0.195]      | 0.183<br>[-0.565, 0.930]      | 0.180<br>[-0.567, 0.927]      |
| HH_REL (ref: Catholic): Islam                    | -0.326<br>[-1.138, 0.487]    | -0.332<br>[-1.144, 0.479]   | 0.722**<br>[0.116, 1.327]     | -1.716***<br>[-2.973, -0.459] | -0.383<br>[-0.989, 0.224]     | -0.201<br>[-0.859, 0.457]     | -0.190<br>[-0.421, 0.041]     | 0.150<br>[-0.549, 0.850]      | 0.145<br>[-0.554, 0.844]      |
| HH_REL (ref: Catholic): Traditionalist           | -0.677<br>[-2.263, 0.910]    | -0.669<br>[-2.251, 0.913]   | 0.942<br>[-0.244, 2.127]      | 0.236<br>[-2.038, 2.511]      | -0.913<br>[-2.224, 0.398]     | -0.536<br>[-1.263, 0.192]     | -0.253**<br>[-0.496, -0.010]  | 0.132<br>[-0.787, 1.050]      | 0.131<br>[-0.787, 1.049]      |
| HH_REL (ref: Catholic): Other                    | 0.000<br>[0.000, 0.000]      | 0.000<br>[0.000, 0.000]     | 0.000<br>[0.000, 0.000]       | 0.000<br>[0.000, 0.000]       | 0.000<br>[0.000, 0.000]       | 1.210<br>[-0.710, 3.129]      | -0.414***<br>[-0.636, -0.192] | -1.208<br>[-3.688, 1.271]     | -1.195<br>[-3.677, 1.286]     |
| HH_ETH (ref: Ekoi): Fulani                       | 0.087<br>[-0.590, 0.763]     | 0.089<br>[-0.587, 0.766]    | 0.537**<br>[0.041, 1.032]     | -0.375<br>[-1.834, 1.084]     | -0.552**<br>[-1.053, -0.050]  | 0.389***<br>[0.232, 0.546]    | 0.208***<br>[0.138, 0.278]    | 2.211<br>[-0.597, 5.018]      | 2.191<br>[-0.615, 4.996]      |
| HH_ETH (ref: Ekoi): Hausa                        | 0.339<br>[-0.180, 0.859]     | 0.338<br>[-0.181, 0.857]    | 0.474**<br>[0.096, 0.851]     | -0.792<br>[-1.816, 0.233]     | -0.401**<br>[-0.782, -0.021]  | 0.735***<br>[0.581, 0.889]    | 0.333***<br>[0.272, 0.394]    | 1.858<br>[-0.943, 4.659]      | 1.841<br>[-0.959, 4.641]      |
| HH_ETH (ref: Ekoi): Ibibio                       | 0.000<br>[0.000, 0.000]      | 0.000<br>[0.000, 0.000]     | 0.000<br>[0.000, 0.000]       | 0.000<br>[0.000, 0.000]       | 0.000<br>[0.000, 0.000]       | 0.980***<br>[0.667, 1.292]    | -0.492<br>[-2.642, 1.658]     | 0.000<br>[0.000, 0.000]       | 0.000<br>[0.000, 0.000]       |
| HH_ETH (ref: Ekoi): Igala                        | 0.000<br>[0.000, 0.000]      | 0.000<br>[0.000, 0.000]     | 0.000<br>[0.000, 0.000]       | 0.000<br>[0.000, 0.000]       | 0.000<br>[0.000, 0.000]       | 3.909***<br>[3.548, 4.269]    | 2.169***<br>[2.042, 2.296]    | 0.000<br>[0.000, 0.000]       | 0.000<br>[0.000, 0.000]       |
| HH_ETH (ref: Ekoi): Igbo                         | 0.216<br>[-0.866, 1.298]     | 0.209<br>[-0.872, 1.290]    | -1.134*<br>[-2.357, 0.088]    | -0.479<br>[-1.729, 0.772]     | 0.412<br>[-0.482, 1.306]      | 1.275**<br>[0.105, 2.444]     | 0.422***<br>[0.130, 0.714]    | 0.000<br>[0.000, 0.000]       | 0.000<br>[0.000, 0.000]       |
| HH_ETH (ref: Ekoi): Ijaw / Izon                  |                              |                             |                               |                               |                               |                               |                               |                               |                               |
| HH_ETH (ref: Ekoi): Kanuri / Beriberi            | 0.626<br>[-0.630, 1.882]     | 0.641<br>[-0.614, 1.895]    | 1.715**<br>[0.170, 3.259]     | 0.000<br>[0.000, 0.000]       | -1.428*<br>[-2.963, 0.107]    | 1.051***<br>[0.453, 1.649]    | 0.828***<br>[0.349, 1.307]    | 2.261<br>[-0.649, 5.170]      | 2.241<br>[-0.667, 5.149]      |
| HH_ETH (ref: Ekoi): Tiv                          | 0.000<br>[0.000, 0.000]      | 0.000<br>[0.000, 0.000]     | 0.000<br>[0.000, 0.000]       | 1.472<br>[-1.265, 4.208]      | 0.197<br>[-2.515, 2.909]      | 0.694<br>[-0.510, 1.898]      | -0.069<br>[-0.478, 0.339]     | 0.000<br>[0.000, 0.000]       | 0.000<br>[0.000, 0.000]       |
| HH_ETH (ref: Ekoi): Yoruba                       | 0.609<br>[-0.739, 1.958]     | 0.610<br>[-0.736, 1.957]    | -0.492<br>[-1.475, 0.491]     | 0.489<br>[-0.939, 1.918]      | 0.230<br>[-0.676, 1.136]      | 0.606<br>[-0.445, 1.656]      | 0.475***<br>[0.162, 0.787]    | 2.118<br>[-1.034, 5.270]      | 2.107<br>[-1.043, 5.258]      |
|                                                  | 0.000                        | 0.000                       | 0.000                         | 0.000                         | 0.000                         | 0.760***                      | 0.386***                      | 2.275                         | 2.257                         |

|                                            |                  |                  |                  |                  |                  |                  |                  |                 |                 |
|--------------------------------------------|------------------|------------------|------------------|------------------|------------------|------------------|------------------|-----------------|-----------------|
| HH_ETH (ref: Ekoi): Other                  | [0.000, 0.000]   | [0.000, 0.000]   | [0.000, 0.000]   | [0.000, 0.000]   | [0.000, 0.000]   | [0.412, 1.107]   | [0.256, 0.516]   | [-0.546, 5.096] | [-0.563, 5.076] |
|                                            | -0.009           | -0.009           | 0.044***         | -0.012           | -0.038***        | -0.016*          | -0.006*          | 0.122***        | 0.122***        |
| HH_SIZ                                     | [-0.037, 0.020]  | [-0.037, 0.020]  | [0.022, 0.065]   | [-0.081, 0.058]  | [-0.060, -0.017] | [-0.033, 0.001]  | [-0.013, 0.001]  | [0.101, 0.143]  | [0.101, 0.143]  |
|                                            | 0.133***         | 0.133***         | -0.203***        | 0.286***         | 0.170***         | 0.221***         | 0.063***         | -0.005          | -0.005          |
| HH_WEA                                     | [0.080, 0.186]   | [0.080, 0.186]   | [-0.243, -0.163] | [0.166, 0.405]   | [0.130, 0.209]   | [0.183, 0.259]   | [0.048, 0.079]   | [-0.042, 0.031] | [-0.042, 0.031] |
|                                            | 1.387***         | 1.287***         | 0.109            | -0.886*          | 0.023            | -0.710***        | -0.120*          | 0.276           | 0.270           |
| YEAR (ref: 2003): 2008                     | [0.505, 2.270]   | [0.402, 2.172]   | [-0.313, 0.531]  | [-1.808, 0.035]  | [-0.417, 0.462]  | [-1.208, -0.212] | [-0.257, 0.018]  | [-0.075, 0.627] | [-0.081, 0.621] |
|                                            | 1.739***         | 1.575***         | -0.181           | -1.844***        | 0.376*           | -0.523*          | 0.032            | 0.289           | 0.309           |
| YEAR (ref: 2003): 2013                     | [0.753, 2.726]   | [0.593, 2.557]   | [-0.602, 0.239]  | [-2.814, -0.874] | [-0.062, 0.813]  | [-1.053, 0.006]  | [-0.126, 0.190]  | [-0.146, 0.723] | [-0.127, 0.745] |
|                                            | 1.087**          | 1.170***         | -0.450**         | 0.043            | 0.476**          | -0.116           | 0.268***         | 0.272           | 0.207           |
| YEAR (ref: 2003): 2018                     | [0.216, 1.959]   | [0.304, 2.035]   | [-0.872, -0.028] | [-0.846, 0.932]  | [0.037, 0.915]   | [-0.623, 0.391]  | [0.113, 0.424]   | [-0.054, 0.599] | [-0.106, 0.520] |
|                                            | -8.155***        | -7.870***        | 2.044***         | -3.822***        | -2.524***        | 1.132**          | 0.415**          | -0.185          | -0.229          |
| Constant                                   | [-9.559, -6.752] | [-9.212, -6.529] | [1.300, 2.788]   | [-5.669, -1.975] | [-3.287, -1.760] | [0.205, 2.059]   | [0.095, 0.736]   | [-3.118, 2.747] | [-3.160, 2.701] |
|                                            | 0.708***         | 0.705***         | 0.134***         | 0.290            | 0.143***         | -0.338***        | -1.448***        | 0.025           | 0.026           |
| Multilevel variance parameter: Level 1     | [0.391, 1.025]   | [0.389, 1.020]   | [0.038, 0.230]   | [-0.208, 0.789]  | [0.041, 0.244]   | [-0.492, -0.183] | [-1.629, -1.267] | [-0.012, 0.062] | [-0.012, 0.063] |
|                                            |                  |                  |                  |                  |                  | 0.845***         | -0.043*          |                 |                 |
| Multilevel variance parameter:<br>Residual |                  |                  |                  |                  |                  | [0.798, 0.892]   | [-0.094, 0.007]  |                 |                 |
| Observations (Level 2)                     | 7249             | 7249             | 10429            | 10383            | 10432            | 10447            | 10663            | 16552           | 16552           |
| Observations (Level 1)                     | 166              | 166              | 166              | 166              | 166              | 166              | 166              | 166             | 166             |
| Akaike Information Criterion               | 2869.01          | 2870.86          | 5101.199         | 687.393          | 5117.543         | 47639.029        | 29619.064        | 8734.342        | 8734.38         |
| Prob. > $\chi^2$                           | <0.001           | <0.001           | <0.001           | <0.001           | <0.001           | <0.001           | <0.001           | <0.001          | <0.001          |

| South East                                       | Non-polio full immunisation   |                               | Delivery                      |                               |                              | Antenatal care                |                               | Child survival                |                               |
|--------------------------------------------------|-------------------------------|-------------------------------|-------------------------------|-------------------------------|------------------------------|-------------------------------|-------------------------------|-------------------------------|-------------------------------|
|                                                  | Full model                    | Interaction model (EXPxAGE)   | At home                       | At private facility           | At public facility           | No. of antenatal care visits  | No. of tetanus injections     | Exposure decomposition        | Total exposure                |
| EXP_CHI                                          | 0.092<br>[-0.035, 0.220]      | 0.238**<br>[0.056, 0.420]     |                               |                               |                              |                               |                               |                               |                               |
| EXPxAGE                                          |                               | -0.005***<br>[-0.008, -0.002] |                               |                               |                              |                               |                               |                               |                               |
| EXP_PREG                                         |                               |                               | 0.036<br>[-0.062, 0.135]      | 0.020<br>[-0.060, 0.099]      | -0.049<br>[-0.129, 0.030]    | 0.155**<br>[0.001, 0.308]     | 0.010<br>[-0.021, 0.042]      |                               |                               |
| EXP_PREG_nod<br>(date approximation)             |                               |                               |                               |                               |                              |                               |                               | 0.036<br>[-0.116, 0.189]      |                               |
| EXP_CHI_nod<br>(date approximation)              |                               |                               |                               |                               |                              |                               |                               | -0.043<br>[-0.171, 0.085]     |                               |
| EXP_TOT_nod (total exposure, date approximation) |                               |                               |                               |                               |                              |                               |                               |                               | -0.013<br>[-0.126, 0.099]     |
| CHI_AGE                                          | 0.112***<br>[0.069, 0.155]    | 0.048***<br>[0.019, 0.078]    |                               |                               |                              |                               |                               | -0.017<br>[-0.056, 0.022]     | -0.013<br>[-0.052, 0.025]     |
| CHI_AGE2                                         | -0.002***<br>[-0.002, -0.001] |                               |                               |                               |                              |                               |                               | 0.000<br>[-0.000, 0.001]      | 0.000<br>[-0.000, 0.001]      |
| CHI_ORD                                          | -0.037<br>[-0.100, 0.026]     | -0.036<br>[-0.099, 0.027]     |                               |                               |                              |                               |                               | -0.122***<br>[-0.195, -0.048] | -0.122***<br>[-0.195, -0.048] |
| CHI_SEX                                          | -0.149<br>[-0.362, 0.063]     | -0.148<br>[-0.360, 0.065]     |                               |                               |                              |                               |                               | 0.386***<br>[0.127, 0.645]    | 0.383***<br>[0.124, 0.642]    |
| MOT_ANC                                          | 0.030***<br>[0.007, 0.053]    | 0.030***<br>[0.007, 0.053]    | -0.104***<br>[-0.131, -0.077] | 0.037***<br>[0.020, 0.055]    | 0.021**<br>[0.003, 0.038]    |                               |                               | -0.008<br>[-0.033, 0.017]     | -0.007<br>[-0.032, 0.018]     |
| MOT_EDM                                          | 0.055*<br>[-0.004, 0.115]     | 0.055*<br>[-0.004, 0.114]     | -0.075**<br>[-0.132, -0.018]  | -0.027<br>[-0.075, 0.021]     | 0.099***<br>[0.049, 0.148]   | 0.056<br>[-0.061, 0.173]      | 0.040***<br>[0.020, 0.061]    | -0.001<br>[-0.071, 0.069]     | -0.001<br>[-0.071, 0.069]     |
| MOT_EDF                                          | 0.016<br>[-0.046, 0.079]      | 0.016<br>[-0.047, 0.078]      | -0.106***<br>[-0.164, -0.048] | 0.055**<br>[0.003, 0.106]     | 0.036<br>[-0.016, 0.088]     | 0.008<br>[-0.095, 0.111]      | -0.004<br>[-0.032, 0.024]     | 0.024<br>[-0.046, 0.095]      | 0.026<br>[-0.045, 0.096]      |
| MOT_AWE                                          | 2.623***<br>[2.236, 3.011]    | 2.613***<br>[2.226, 3.000]    | -0.974***<br>[-1.244, -0.703] | 0.199<br>[-0.055, 0.452]      | 0.802***<br>[0.520, 1.083]   | 1.372***<br>[0.702, 2.042]    | 0.448***<br>[0.274, 0.621]    |                               |                               |
| MOT_AGE                                          | 0.013<br>[-0.010, 0.036]      | 0.013<br>[-0.011, 0.036]      | -0.020**<br>[-0.037, -0.002]  | -0.001<br>[-0.015, 0.013]     | 0.012*<br>[-0.002, 0.026]    | -0.001<br>[-0.024, 0.022]     | 0.002<br>[-0.003, 0.007]      | -0.019<br>[-0.044, 0.007]     | -0.019<br>[-0.044, 0.007]     |
| HH_RUR                                           | -0.094<br>[-0.343, 0.155]     | -0.102<br>[-0.351, 0.147]     | -0.003<br>[-0.271, 0.264]     | -0.129<br>[-0.333, 0.075]     | 0.181*<br>[-0.020, 0.382]    | -0.018<br>[-0.493, 0.457]     | -0.060<br>[-0.141, 0.020]     | -0.306**<br>[-0.571, -0.041]  | -0.305**<br>[-0.570, -0.041]  |
| HH_REL (ref: Catholic): Other Christian          | -0.110<br>[-0.338, 0.118]     | -0.103<br>[-0.330, 0.125]     | 0.016<br>[-0.221, 0.254]      | -0.189**<br>[-0.366, -0.012]  | 0.206**<br>[0.028, 0.384]    | -0.235<br>[-0.572, 0.103]     | -0.099**<br>[-0.175, -0.023]  | -0.316**<br>[-0.590, -0.041]  | -0.312**<br>[-0.587, -0.038]  |
| HH_REL (ref: Catholic): Islam                    | -0.055<br>[-2.549, 2.440]     | -0.031<br>[-2.503, 2.442]     | -0.726<br>[-3.253, 1.801]     | 1.069<br>[-0.661, 2.798]      | -0.588<br>[-2.638, 1.463]    | 0.705<br>[-2.529, 3.938]      | -0.146<br>[-0.858, 0.567]     | 0.000<br>[0.000, 0.000]       | 0.000<br>[0.000, 0.000]       |
| HH_REL (ref: Catholic): Traditionalist           | -0.235<br>[-0.870, 0.400]     | -0.223<br>[-0.859, 0.412]     | 1.728***<br>[1.049, 2.407]    | -1.829***<br>[-2.694, -0.964] | -0.951**<br>[-1.693, -0.209] | -1.223**<br>[-2.193, -0.254]  | -0.326**<br>[-0.646, -0.005]  | -0.303<br>[-1.031, 0.424]     | -0.299<br>[-1.027, 0.429]     |
| HH_REL (ref: Catholic): Other                    | 0.000<br>[0.000, 0.000]       | 0.000<br>[0.000, 0.000]       | 0.000<br>[0.000, 0.000]       | 0.000<br>[0.000, 0.000]       | 0.000<br>[0.000, 0.000]      | 16.125***<br>[15.152, 17.099] | 1.493***<br>[1.304, 1.683]    | -1.997<br>[-4.770, 0.776]     | -2.025<br>[-4.787, 0.737]     |
| HH_ETH (ref: Ekoi): Fulani                       | 0.000<br>[0.000, 0.000]       | 0.000<br>[0.000, 0.000]       | 0.000<br>[0.000, 0.000]       | 0.000<br>[0.000, 0.000]       | 0.000<br>[0.000, 0.000]      | 0.000<br>[0.000, 0.000]       | 0.000<br>[0.000, 0.000]       | 0.000<br>[0.000, 0.000]       | 0.000<br>[0.000, 0.000]       |
| HH_ETH (ref: Ekoi): Hausa                        | -1.150<br>[-2.979, 0.679]     | -1.069<br>[-2.890, 0.753]     | -0.604<br>[-3.250, 2.042]     | 0.283<br>[-1.011, 1.577]      | -0.489<br>[-1.841, 0.863]    | 3.793***<br>[2.817, 4.769]    | 0.286*<br>[-0.006, 0.578]     | 0.370<br>[-1.248, 1.989]      | 0.389<br>[-1.227, 2.006]      |
| HH_ETH (ref: Ekoi): Ibibio                       | -0.356<br>[-2.952, 2.240]     | -0.310<br>[-2.905, 2.285]     | 0.975<br>[-1.143, 3.094]      | -1.174<br>[-3.019, 0.671]     | 0.507<br>[-1.176, 2.190]     | 0.393<br>[-1.936, 2.722]      | 0.100<br>[-0.733, 0.933]      | 0.296<br>[-2.029, 2.622]      | 0.303<br>[-2.023, 2.629]      |
| HH_ETH (ref: Ekoi): Igala                        | -0.604<br>[-3.173, 1.964]     | -0.637<br>[-3.211, 1.936]     | -0.394<br>[-2.689, 1.901]     | -2.032<br>[-4.466, 0.402]     | 1.572*<br>[-0.222, 3.366]    | 3.192***<br>[1.463, 4.921]    | 0.983<br>[-0.706, 2.673]      | 0.282<br>[-1.560, 2.124]      | 0.279<br>[-1.562, 2.121]      |
| HH_ETH (ref: Ekoi): Igbo                         | -0.887<br>[-2.193, 0.419]     | -0.856<br>[-2.161, 0.449]     | -0.040<br>[-1.256, 1.177]     | -0.183<br>[-1.007, 0.640]     | 0.120<br>[-0.754, 0.994]     | 3.875***<br>[3.160, 4.590]    | 0.400***<br>[0.282, 0.518]    | 0.828<br>[-0.257, 1.914]      | 0.839<br>[-0.246, 1.924]      |
| HH_ETH (ref: Ekoi): Ijaw / Izon                  | 0.000<br>[0.000, 0.000]       | 0.000<br>[0.000, 0.000]       | 0.000<br>[0.000, 0.000]       | 0.000<br>[0.000, 0.000]       | 0.000<br>[0.000, 0.000]      | -0.404<br>[-1.516, 0.707]     | -1.627***<br>[-1.814, -1.440] | 0.000<br>[0.000, 0.000]       | 0.000<br>[0.000, 0.000]       |
| HH_ETH (ref: Ekoi): Kanuri / Beriberi            |                               |                               |                               |                               |                              |                               |                               |                               |                               |
| HH_ETH (ref: Ekoi): Tiv                          | 0.000<br>[0.000, 0.000]       | 0.000<br>[0.000, 0.000]       | 0.000<br>[0.000, 0.000]       | 0.000<br>[0.000, 0.000]       | 0.000<br>[0.000, 0.000]      | -3.047***<br>[-3.747, -2.348] | -1.582***<br>[-1.708, -1.456] | 0.000<br>[0.000, 0.000]       | 0.000<br>[0.000, 0.000]       |
| HH_ETH (ref: Ekoi): Yoruba                       | 0.000<br>[0.000, 0.000]       | 0.000<br>[0.000, 0.000]       | 0.220<br>[-2.478, 2.919]      | -1.742*<br>[-3.529, 0.045]    | 1.350<br>[-0.360, 3.060]     | 2.502**<br>[0.025, 4.978]     | 0.491<br>[-0.231, 1.212]      | 0.000<br>[0.000, 0.000]       | 0.000<br>[0.000, 0.000]       |
| HH_ETH (ref: Ekoi): Other                        | 0.000                         | 0.000                         | 0.000                         | 0.000                         | 0.000                        | 4.086***                      | 0.676***                      | 0.000                         | 0.000                         |

|                                         |                  |                  |                  |                  |                  |                  |                  |                 |                 |
|-----------------------------------------|------------------|------------------|------------------|------------------|------------------|------------------|------------------|-----------------|-----------------|
|                                         | [0.000, 0.000]   | [0.000, 0.000]   | [0.000, 0.000]   | [0.000, 0.000]   | [0.000, 0.000]   | [1.888, 6.284]   | [0.389, 0.964]   | [0.000, 0.000]  | [0.000, 0.000]  |
|                                         | -0.012           | -0.013           | 0.023            | -0.002           | -0.012           | -0.101***        | -0.006           | 0.206***        | 0.206***        |
| HH_SIZ                                  | [-0.052, 0.028]  | [-0.053, 0.027]  | [-0.017, 0.064]  | [-0.035, 0.030]  | [-0.045, 0.021]  | [-0.166, -0.037] | [-0.018, 0.007]  | [0.132, 0.280]  | [0.132, 0.280]  |
|                                         | 0.165***         | 0.164***         | -0.214***        | 0.152***         | -0.016           | 0.297***         | 0.046***         | 0.034           | 0.034           |
| HH_WEA                                  | [0.114, 0.217]   | [0.113, 0.215]   | [-0.268, -0.161] | [0.111, 0.192]   | [-0.055, 0.024]  | [0.201, 0.393]   | [0.029, 0.064]   | [-0.025, 0.093] | [-0.025, 0.093] |
|                                         | 0.876***         | 0.878***         | -0.072           | 0.063            | -0.165           | -0.647           | -0.070           | 0.265           | 0.227           |
| YEAR (ref: 2003): 2008                  | [0.211, 1.541]   | [0.214, 1.542]   | [-0.638, 0.494]  | [-0.404, 0.530]  | [-0.641, 0.312]  | [-1.778, 0.484]  | [-0.286, 0.147]  | [-0.444, 0.973] | [-0.477, 0.930] |
|                                         | 0.906***         | 0.914***         | -0.075           | -0.150           | 0.092            | 0.659            | 0.113            | 0.234           | 0.166           |
| YEAR (ref: 2003): 2013                  | [0.250, 1.563]   | [0.258, 1.571]   | [-0.629, 0.479]  | [-0.602, 0.302]  | [-0.367, 0.551]  | [-0.404, 1.722]  | [-0.119, 0.345]  | [-0.475, 0.943] | [-0.529, 0.861] |
|                                         | 1.159***         | 1.301***         | -0.147           | -0.237           | 0.217            | -0.653           | 0.027            | 0.468           | 0.462           |
| YEAR (ref: 2003): 2018                  | [0.408, 1.910]   | [0.534, 2.067]   | [-0.738, 0.444]  | [-0.718, 0.244]  | [-0.268, 0.702]  | [-1.764, 0.458]  | [-0.217, 0.270]  | [-0.359, 1.295] | [-0.365, 1.289] |
|                                         | -4.957***        | -4.578***        | 2.123***         | -1.095**         | -2.661***        | 2.038**          | 1.009***         | 1.657**         | 1.685**         |
| Constant                                | [-6.650, -3.263] | [-6.238, -2.917] | [0.628, 3.618]   | [-2.177, -0.013] | [-3.796, -1.526] | [0.300, 3.777]   | [0.663, 1.355]   | [0.114, 3.199]  | [0.144, 3.226]  |
|                                         | 0.169**          | 0.169**          | 0.750***         | 0.355***         | 0.238***         | 0.613***         | -1.893***        | 0.000           | 0.000           |
| Multilevel variance parameter: Level 1  | [0.034, 0.304]   | [0.033, 0.304]   | [0.346, 1.154]   | [0.183, 0.528]   | [0.105, 0.371]   | [0.435, 0.791]   | [-2.192, -1.594] | [-0.000, 0.000] | [-0.000, 0.000] |
|                                         |                  |                  |                  |                  |                  | 1.510***         | -0.008           |                 |                 |
| Multilevel variance parameter: Residual |                  |                  |                  |                  |                  | [1.439, 1.582]   | [-0.073, 0.056]  |                 |                 |
| Observations (Level 2)                  | 2036             | 2036             | 2900             | 2900             | 2900             | 2949             | 3229             | 4362            | 4362            |
| Observations (Level 1)                  | 85               | 85               | 86               | 86               | 123              | 86               | 87               | 87              | 87              |
| Akaike Information Criterion            | 2198.177         | 2202.549         | 2361.019         | 3572.969         | 3513.076         | 17468.034        | 9205.156         | 1926.233        | 1925.154        |
| Prob. > $\chi^2$                        | <0.001           | <0.001           | <0.001           | <0.001           | <0.001           | <0.001           | <0.001           | <0.001          | <0.001          |



| South South                                      | Non-polio full immunisation   |                               | Delivery                      |                               |                               | Antenatal care                |                               | Child survival                |                               |
|--------------------------------------------------|-------------------------------|-------------------------------|-------------------------------|-------------------------------|-------------------------------|-------------------------------|-------------------------------|-------------------------------|-------------------------------|
|                                                  | Full model                    | Interaction model (EXPxAGE)   | At home                       | At private facility           | At public facility            | No. of antenatal care visits  | No. of tetanus injections     | Exposure decomposition        | Total exposure                |
| EXP_CHI                                          | 0.065<br>[-0.042, 0.171]      | 0.171**<br>[0.001, 0.341]     |                               |                               |                               |                               |                               |                               |                               |
| EXPxAGE                                          |                               | -0.003***<br>[-0.006, -0.001] |                               |                               |                               |                               |                               |                               |                               |
| EXP_PREG                                         |                               |                               | -0.023<br>[-0.102, 0.056]     | 0.038<br>[-0.074, 0.150]      | 0.014<br>[-0.060, 0.088]      | 0.072<br>[-0.055, 0.198]      | 0.037*<br>[-0.000, 0.074]     |                               |                               |
| EXP_PREG_nod<br>(date approximation)             |                               |                               |                               |                               |                               |                               |                               | -0.056<br>[-0.206, 0.094]     |                               |
| EXP_CHI_nod<br>(date approximation)              |                               |                               |                               |                               |                               |                               |                               | -0.005<br>[-0.139, 0.128]     |                               |
| EXP_TOT_nod (total exposure, date approximation) |                               |                               |                               |                               |                               |                               |                               |                               | -0.026<br>[-0.142, 0.091]     |
| CHI_AGE                                          | 0.073***<br>[0.035, 0.110]    | 0.028**<br>[0.003, 0.053]     |                               |                               |                               |                               |                               | 0.023<br>[-0.015, 0.061]      | 0.021<br>[-0.016, 0.059]      |
| CHI_AGE2                                         | -0.001***<br>[-0.002, -0.000] |                               |                               |                               |                               |                               |                               | 0.000<br>[-0.001, 0.000]      | 0.000<br>[-0.001, 0.000]      |
| CHI_ORD                                          | -0.073**<br>[-0.135, -0.010]  | -0.074**<br>[-0.137, -0.011]  |                               |                               |                               |                               |                               | -0.239***<br>[-0.318, -0.160] | -0.239***<br>[-0.318, -0.160] |
| CHI_SEX                                          | 0.176*<br>[-0.016, 0.368]     | 0.173*<br>[-0.019, 0.365]     |                               |                               |                               |                               |                               | 0.317**<br>[0.054, 0.580]     | 0.317**<br>[0.054, 0.580]     |
| MOT_ANC                                          | 0.039***<br>[0.019, 0.060]    | 0.039***<br>[0.019, 0.060]    | -0.143***<br>[-0.162, -0.124] | 0.072***<br>[0.050, 0.093]    | 0.083***<br>[0.067, 0.100]    |                               |                               | 0.017<br>[-0.011, 0.046]      | 0.017<br>[-0.011, 0.046]      |
| MOT_EDM                                          | 0.050*<br>[-0.000, 0.101]     | 0.050*<br>[-0.001, 0.101]     | -0.023<br>[-0.069, 0.023]     | 0.028<br>[-0.038, 0.094]      | 0.015<br>[-0.028, 0.058]      | 0.075**<br>[0.005, 0.146]     | 0.031***<br>[0.010, 0.051]    | 0.033<br>[-0.032, 0.097]      | 0.033<br>[-0.032, 0.097]      |
| MOT_EDF                                          | 0.010<br>[-0.046, 0.066]      | 0.010<br>[-0.046, 0.065]      | -0.005<br>[-0.055, 0.044]     | 0.029<br>[-0.044, 0.101]      | -0.007<br>[-0.054, 0.040]     | 0.094*<br>[-0.000, 0.188]     | -0.011<br>[-0.032, 0.010]     | -0.036<br>[-0.113, 0.040]     | -0.036<br>[-0.113, 0.040]     |
| MOT_AWE                                          | 2.921***<br>[2.577, 3.265]    | 2.908***<br>[2.564, 3.251]    | -1.262***<br>[-1.510, -1.015] | 0.825***<br>[0.411, 1.239]    | 1.080***<br>[0.830, 1.330]    | 2.596***<br>[2.197, 2.995]    | 0.657***<br>[0.539, 0.775]    |                               |                               |
| MOT_AGE                                          | 0.026**<br>[0.005, 0.047]     | 0.026**<br>[0.005, 0.048]     | -0.030***<br>[-0.044, -0.016] | 0.007<br>[-0.013, 0.027]      | 0.023***<br>[0.010, 0.036]    | 0.019<br>[-0.006, 0.045]      | 0.001<br>[-0.005, 0.007]      | -0.003<br>[-0.031, 0.025]     | -0.003<br>[-0.031, 0.025]     |
| HH_RUR                                           | -0.040<br>[-0.280, 0.200]     | -0.047<br>[-0.288, 0.193]     | 0.715***<br>[0.476, 0.953]    | -0.564***<br>[-0.874, -0.253] | -0.322***<br>[-0.543, -0.100] | -1.067***<br>[-1.594, -0.539] | -0.065<br>[-0.192, 0.062]     | -0.405**<br>[-0.762, -0.048]  | -0.405**<br>[-0.762, -0.049]  |
| HH_REL (ref: Catholic): Other Christian          | -0.391**<br>[-0.741, -0.042]  | -0.396**<br>[-0.746, -0.046]  | 0.312**<br>[0.027, 0.598]     | 0.237<br>[-0.166, 0.641]      | -0.446***<br>[-0.710, -0.182] | -0.375<br>[-1.003, 0.253]     | -0.106*<br>[-0.226, 0.015]    | 0.054<br>[-0.403, 0.510]      | 0.054<br>[-0.402, 0.510]      |
| HH_REL (ref: Catholic): Islam                    | 0.009<br>[-0.761, 0.779]      | 0.006<br>[-0.765, 0.776]      | -0.084<br>[-0.771, 0.603]     | 0.063<br>[-0.702, 0.829]      | 0.157<br>[-0.457, 0.771]      | 0.019<br>[-1.728, 1.765]      | 0.169<br>[-0.139, 0.477]      | 0.786<br>[-0.598, 2.169]      | 0.787<br>[-0.597, 2.171]      |
| HH_REL (ref: Catholic): Traditionalist           | -0.746<br>[-1.750, 0.258]     | -0.727<br>[-1.732, 0.277]     | 0.634<br>[-0.311, 1.579]      | -0.113<br>[-1.255, 1.030]     | -0.469<br>[-1.335, 0.397]     | 0.748<br>[-0.852, 2.347]      | -0.339<br>[-0.789, 0.112]     | -0.562<br>[-1.539, 0.415]     | -0.557<br>[-1.534, 0.420]     |
| HH_REL (ref: Catholic): Other                    | -0.300<br>[-1.524, 0.924]     | -0.294<br>[-1.520, 0.932]     | -0.562<br>[-1.606, 0.482]     | 0.000<br>[0.000, 0.000]       | 0.518<br>[-0.484, 1.519]      | -0.793<br>[-2.518, 0.933]     | -0.237<br>[-1.005, 0.532]     | 0.000<br>[0.000, 0.000]       | 0.000<br>[0.000, 0.000]       |
| HH_ETH (ref: Ekoi): Fulani                       | -1.438<br>[-3.691, 0.815]     | -1.440<br>[-3.692, 0.813]     | 0.033<br>[-1.779, 1.845]      | 0.177<br>[-2.288, 2.643]      | 0.135<br>[-1.520, 1.790]      | 1.450<br>[-2.747, 5.646]      | -0.187<br>[-0.686, 0.312]     | -1.042<br>[-3.402, 1.317]     | -1.025<br>[-3.384, 1.334]     |
| HH_ETH (ref: Ekoi): Hausa                        | -0.923***<br>[-1.445, -0.401] | -0.920***<br>[-1.444, -0.397] | 0.244<br>[-0.267, 0.754]      | 0.183<br>[-0.805, 1.171]      | -0.129<br>[-0.625, 0.367]     | 0.598<br>[-0.506, 1.701]      | -0.003<br>[-0.274, 0.267]     | -0.496<br>[-1.258, 0.265]     | -0.494<br>[-1.255, 0.267]     |
| HH_ETH (ref: Ekoi): Ibibio                       | -0.758<br>[-3.413, 1.898]     | -0.740<br>[-3.351, 1.871]     | 0.050<br>[-1.849, 1.949]      | 1.096<br>[-1.306, 3.499]      | -0.256<br>[-1.947, 1.436]     | 0.828<br>[-1.132, 2.787]      | -0.337<br>[-1.153, 0.479]     | -0.964<br>[-3.153, 1.225]     | -0.963<br>[-3.151, 1.224]     |
| HH_ETH (ref: Ekoi): Igala                        | -0.492*<br>[-1.051, 0.067]    | -0.488*<br>[-1.049, 0.073]    | -0.025<br>[-0.539, 0.488]     | 1.214***<br>[0.297, 2.130]    | -0.488**<br>[-0.975, -0.000]  | 1.838***<br>[0.562, 3.114]    | 0.088<br>[-0.165, 0.342]      | -0.304<br>[-1.113, 0.506]     | -0.300<br>[-1.109, 0.509]     |
| HH_ETH (ref: Ekoi): Ijaw / Izon                  | -0.640**<br>[-1.138, -0.143]  | -0.639**<br>[-1.140, -0.139]  | 0.804***<br>[0.290, 1.317]    | -0.043<br>[-1.023, 0.938]     | -0.679***<br>[-1.178, -0.180] | 0.095<br>[-1.029, 1.219]      | -0.018<br>[-0.265, 0.229]     | -0.213<br>[-0.951, 0.526]     | -0.212<br>[-0.950, 0.526]     |
| HH_ETH (ref: Ekoi): Kanuri / Beriberi            | 0.000<br>[0.000, 0.000]       | 0.000<br>[0.000, 0.000]       | 0.000<br>[0.000, 0.000]       | 0.000<br>[0.000, 0.000]       | 0.000<br>[0.000, 0.000]       |                               |                               | 0.000<br>[0.000, 0.000]       | 0.000<br>[0.000, 0.000]       |
| HH_ETH (ref: Ekoi): Tiv                          | 0.000<br>[0.000, 0.000]       | 0.000<br>[0.000, 0.000]       | 0.000<br>[0.000, 0.000]       | 0.000<br>[0.000, 0.000]       | 0.000<br>[0.000, 0.000]       | 1.582**<br>[0.257, 2.906]     | -1.433***<br>[-1.688, -1.177] | 0.000<br>[0.000, 0.000]       | 0.000<br>[0.000, 0.000]       |
| HH_ETH (ref: Ekoi): Yoruba                       | -2.193***<br>[-3.155, -1.231] | -2.185***<br>[-3.148, -1.222] | -0.089<br>[-0.970, 0.791]     | 2.236***<br>[1.101, 3.371]    | -1.470***<br>[-2.336, -0.604] | 1.253<br>[-0.524, 3.030]      | 0.005<br>[-0.370, 0.380]      | 0.131<br>[-1.496, 1.757]      | 0.137<br>[-1.491, 1.765]      |
|                                                  | -0.887***                     | -0.885***                     | 0.126                         | 0.953**                       | -0.384*                       | 1.037*                        | 0.063                         | -0.202                        | -0.201                        |

|                                            |                  |                  |                  |                  |                  |                            |                            |                 |                 |
|--------------------------------------------|------------------|------------------|------------------|------------------|------------------|----------------------------|----------------------------|-----------------|-----------------|
| HH_ETH (ref: Ekoi): Other                  | [-1.352, -0.423] | [-1.352, -0.419] | [-0.319, 0.571]  | [0.066, 1.840]   | [-0.814, 0.046]  | [-0.022, 2.095]            | [-0.169, 0.294]            | [-0.905, 0.500] | [-0.903, 0.501] |
|                                            | -0.016           | -0.017           | 0.058***         | -0.043           | -0.030*          | -0.002                     | -0.016*                    | 0.314***        | 0.315***        |
| HH_SIZ                                     | [-0.060, 0.027]  | [-0.060, 0.027]  | [0.020, 0.095]   | [-0.095, 0.010]  | [-0.065, 0.005]  | [-0.067, 0.064]            | [-0.033, 0.002]            | [0.236, 0.393]  | [0.236, 0.394]  |
|                                            | 0.120***         | 0.119***         | -0.180***        | 0.139***         | 0.103***         | 0.409***                   | 0.066***                   | -0.041          | -0.041          |
| HH_WEA                                     | [0.074, 0.167]   | [0.072, 0.166]   | [-0.223, -0.137] | [0.079, 0.199]   | [0.063, 0.144]   | [0.316, 0.502]             | [0.043, 0.088]             | [-0.105, 0.022] | [-0.104, 0.023] |
|                                            | 0.898**          | 0.906**          | 0.499*           | -0.197           | -0.311           | -0.350                     | -0.306***                  | 1.135***        | 1.150***        |
| YEAR (ref: 2003): 2008                     | [0.146, 1.650]   | [0.153, 1.658]   | [-0.031, 1.029]  | [-0.819, 0.425]  | [-0.800, 0.179]  | [-1.507, 0.807]            | [-0.519, -0.093]           | [0.505, 1.765]  | [0.522, 1.779]  |
|                                            | 1.469***         | 1.461***         | 0.489*           | -0.851***        | -0.036           | -1.238**                   | -0.284**                   | 1.092***        | 1.138***        |
| YEAR (ref: 2003): 2013                     | [0.726, 2.212]   | [0.716, 2.207]   | [-0.034, 1.013]  | [-1.468, -0.234] | [-0.517, 0.446]  | [-2.391, -0.084]           | [-0.503, -0.064]           | [0.480, 1.704]  | [0.543, 1.733]  |
|                                            | 1.745***         | 1.874***         | 0.674**          | -0.759**         | -0.153           | -1.744***                  | -0.372***                  | 1.288***        | 1.287***        |
| YEAR (ref: 2003): 2018                     | [0.917, 2.572]   | [1.022, 2.726]   | [0.117, 1.231]   | [-1.427, -0.091] | [-0.669, 0.363]  | [-2.894, -0.594]           | [-0.601, -0.144]           | [0.519, 2.058]  | [0.518, 2.056]  |
|                                            | -5.197***        | -4.898***        | 2.076***         | -4.455***        | -2.101***        | 2.123**                    | 1.270***                   | 1.540**         | 1.500**         |
| Constant                                   | [-6.400, -3.994] | [-6.061, -3.736] | [1.189, 2.964]   | [-5.818, -3.092] | [-2.943, -1.259] | [0.111, 4.135]             | [0.854, 1.686]             | [0.273, 2.808]  | [0.238, 2.761]  |
|                                            | 0.024            | 0.027            | 0.389***         | 0.640***         | 0.365***         | 0.216**                    | -1.507***                  | 0.057           | 0.057           |
| Multilevel variance parameter: Level 1     | [-0.040, 0.087]  | [-0.038, 0.092]  | [0.190, 0.587]   | [0.282, 0.997]   | [0.193, 0.538]   | [0.007, 0.426]             | [-1.738, -1.276]           | [-0.072, 0.187] | [-0.072, 0.186] |
| Multilevel variance parameter:<br>Residual |                  |                  |                  |                  |                  | 1.554***<br>[1.495, 1.614] | 0.190***<br>[0.136, 0.244] |                 |                 |
| Observations (Level 2)                     | 2514             | 2514             | 3552             | 3528             | 3552             | 3620                       | 3975                       | 4979            | 4979            |
| Observations (Level 1)                     | 111              | 111              | 112              | 112              | 112              | 112                        | 112                        | 113             | 113             |
| Akaike Information Criterion               | 2613.206         | 2616.454         | 3449.379         | 2094.164         | 3846.725         | 21688.628                  | 12916.658                  | 1912.315        | 1910.708        |
| Prob. > $\chi^2$                           | <0.001           | <0.001           | <0.001           | <0.001           | <0.001           | <0.001                     | <0.001                     | <0.001          | <0.001          |

| South West                                       | Non-polio full immunisation              |                                          | Delivery                                  |                                           |                                           | Antenatal care                         |                                        | Child survival                            |                                           |
|--------------------------------------------------|------------------------------------------|------------------------------------------|-------------------------------------------|-------------------------------------------|-------------------------------------------|----------------------------------------|----------------------------------------|-------------------------------------------|-------------------------------------------|
|                                                  | Full model                               | Interaction model (EXPxAGE)              | At home                                   | At private facility                       | At public facility                        | No. of antenatal care visits           | No. of tetanus injections              | Exposure decomposition                    | Total exposure                            |
| EXP_CHI                                          | -0.060<br>[-0.144, 0.024]                | -0.019<br>[-0.138, 0.101]                |                                           |                                           |                                           |                                        |                                        |                                           |                                           |
| EXPxAGE                                          |                                          | -0.002 <sup>*</sup><br>[-0.004, 0.000]   |                                           |                                           |                                           |                                        |                                        |                                           |                                           |
| EXP_PREG                                         |                                          |                                          | 0.055<br>[-0.013, 0.122]                  | -0.003<br>[-0.059, 0.052]                 | -0.033<br>[-0.087, 0.022]                 | -0.069<br>[-0.206, 0.069]              | 0.034 <sup>***</sup><br>[0.009, 0.058] |                                           |                                           |
| EXP_PREG_nod<br>(date approximation)             |                                          |                                          |                                           |                                           |                                           |                                        |                                        | -0.021<br>[-0.145, 0.102]                 |                                           |
| EXP_CHI_nod<br>(date approximation)              |                                          |                                          |                                           |                                           |                                           |                                        |                                        | 0.018<br>[-0.103, 0.139]                  |                                           |
| EXP_TOT_nod (total exposure, date approximation) |                                          |                                          |                                           |                                           |                                           |                                        |                                        |                                           | -0.001<br>[-0.103, 0.101]                 |
| CHI_AGE                                          | 0.083 <sup>***</sup><br>[0.050, 0.117]   | 0.056 <sup>***</sup><br>[0.035, 0.077]   |                                           |                                           |                                           |                                        |                                        | 0.035 <sup>*</sup><br>[-0.001, 0.071]     | 0.035 <sup>*</sup><br>[-0.001, 0.071]     |
| CHI_AGE2                                         | -0.001 <sup>**</sup><br>[-0.001, -0.000] |                                          |                                           |                                           |                                           |                                        |                                        | 0.000<br>[-0.001, 0.000]                  | 0.000<br>[-0.001, 0.000]                  |
| CHI_ORD                                          | -0.087 <sup>**</sup><br>[-0.156, -0.017] | -0.087 <sup>**</sup><br>[-0.157, -0.018] |                                           |                                           |                                           |                                        |                                        | -0.369 <sup>***</sup><br>[-0.468, -0.271] | -0.367 <sup>***</sup><br>[-0.466, -0.269] |
| CHI_SEX                                          | -0.006<br>[-0.182, 0.171]                | -0.002<br>[-0.179, 0.174]                |                                           |                                           |                                           |                                        |                                        | 0.213<br>[-0.061, 0.486]                  | 0.212<br>[-0.061, 0.486]                  |
| MOT_ANC                                          | 0.039 <sup>***</sup><br>[0.024, 0.054]   | 0.039 <sup>***</sup><br>[0.024, 0.054]   | -0.064 <sup>***</sup><br>[-0.078, -0.049] | 0.034 <sup>***</sup><br>[0.023, 0.045]    | 0.011 <sup>*</sup><br>[-0.000, 0.022]     |                                        |                                        | -0.023 <sup>**</sup><br>[-0.045, -0.001]  | -0.022 <sup>**</sup><br>[-0.044, -0.000]  |
| MOT_EDM                                          | 0.042 <sup>*</sup><br>[-0.004, 0.088]    | 0.042 <sup>*</sup><br>[-0.004, 0.088]    | -0.040 <sup>*</sup><br>[-0.082, 0.003]    | 0.054 <sup>***</sup><br>[0.016, 0.091]    | -0.013<br>[-0.049, 0.023]                 | 0.068<br>[-0.024, 0.160]               | 0.002<br>[-0.015, 0.019]               | 0.012<br>[-0.058, 0.082]                  | 0.012<br>[-0.058, 0.082]                  |
| MOT_EDF                                          | -0.031<br>[-0.080, 0.018]                | -0.031<br>[-0.080, 0.018]                | -0.015<br>[-0.059, 0.029]                 | -0.001<br>[-0.041, 0.038]                 | 0.018<br>[-0.019, 0.055]                  | 0.034<br>[-0.077, 0.146]               | 0.008<br>[-0.012, 0.028]               | 0.003<br>[-0.070, 0.075]                  | 0.002<br>[-0.070, 0.074]                  |
| MOT_AWE                                          | 2.962 <sup>***</sup><br>[2.589, 3.336]   | 2.953 <sup>***</sup><br>[2.580, 3.327]   | -1.082 <sup>***</sup><br>[-1.294, -0.870] | 0.072<br>[-0.142, 0.286]                  | 0.973 <sup>***</sup><br>[0.756, 1.190]    | 2.383 <sup>***</sup><br>[1.878, 2.889] | 0.582 <sup>***</sup><br>[0.488, 0.675] |                                           |                                           |
| MOT_AGE                                          | 0.031 <sup>***</sup><br>[0.011, 0.051]   | 0.031 <sup>***</sup><br>[0.011, 0.051]   | -0.006<br>[-0.020, 0.008]                 | -0.005<br>[-0.018, 0.007]                 | 0.011 <sup>*</sup><br>[-0.001, 0.023]     | 0.012<br>[-0.016, 0.041]               | 0.002<br>[-0.003, 0.006]               | -0.012<br>[-0.041, 0.018]                 | -0.012<br>[-0.042, 0.017]                 |
| HH_RUR                                           | -0.242 <sup>*</sup><br>[-0.489, 0.006]   | -0.243 <sup>*</sup><br>[-0.490, 0.005]   | 0.028<br>[-0.217, 0.273]                  | -0.455 <sup>***</sup><br>[-0.668, -0.242] | 0.333 <sup>***</sup><br>[0.129, 0.537]    | 0.423<br>[-0.286, 1.133]               | -0.006<br>[-0.098, 0.086]              | 0.038<br>[-0.304, 0.380]                  | 0.044<br>[-0.297, 0.385]                  |
| HH_REL (ref: Catholic): Other Christian          | -0.095<br>[-0.593, 0.403]                | -0.098<br>[-0.596, 0.400]                | -0.232<br>[-0.672, 0.207]                 | 0.171<br>[-0.186, 0.529]                  | -0.032<br>[-0.385, 0.321]                 | 0.380<br>[-0.733, 1.493]               | 0.053<br>[-0.078, 0.185]               | -0.180<br>[-0.859, 0.500]                 | -0.180<br>[-0.859, 0.499]                 |
| HH_REL (ref: Catholic): Islam                    | -0.402<br>[-0.919, 0.115]                | -0.402<br>[-0.918, 0.114]                | -0.261<br>[-0.718, 0.195]                 | 0.213<br>[-0.164, 0.589]                  | -0.042<br>[-0.412, 0.328]                 | 0.431<br>[-0.780, 1.642]               | 0.098<br>[-0.040, 0.235]               | 0.080<br>[-0.642, 0.803]                  | 0.082<br>[-0.640, 0.804]                  |
| HH_REL (ref: Catholic): Traditionalist           | -0.218<br>[-1.501, 1.066]                | -0.228<br>[-1.508, 1.051]                | 0.404<br>[-0.674, 1.481]                  | -0.846<br>[-2.038, 0.345]                 | 0.350<br>[-0.641, 1.341]                  | 1.704<br>[-3.022, 6.429]               | -0.393 <sup>*</sup><br>[-0.803, 0.017] | 0.124<br>[-2.049, 2.298]                  | 0.112<br>[-2.061, 2.285]                  |
| HH_REL (ref: Catholic): Other                    | 0.994<br>[-3.233, 5.221]                 | 0.992<br>[-3.182, 5.167]                 | 0.337<br>[-2.751, 3.425]                  | 0.000<br>[0.000, 0.000]                   | 1.628<br>[-1.684, 4.939]                  | 0.461<br>[-12.702, 13.625]             | 1.825<br>[-2.055, 5.705]               | 0.000<br>[0.000, 0.000]                   | 0.000<br>[0.000, 0.000]                   |
| HH_ETH (ref: Ekoi): Fulani                       | -0.720<br>[-1.789, 0.349]                | -0.713<br>[-1.784, 0.359]                | 1.513 <sup>***</sup><br>[0.758, 2.268]    | -0.523<br>[-1.340, 0.294]                 | -2.137 <sup>***</sup><br>[-3.144, -1.131] | 0.000<br>[0.000, 0.000]                | 0.000<br>[0.000, 0.000]                | 0.993<br>[-1.064, 3.050]                  | 1.003<br>[-1.053, 3.060]                  |
| HH_ETH (ref: Ekoi): Hausa                        | -0.224<br>[-1.123, 0.675]                | -0.227<br>[-1.125, 0.671]                | 0.613 <sup>*</sup><br>[-0.096, 1.322]     | -0.986 <sup>***</sup><br>[-1.735, -0.237] | 0.418<br>[-0.268, 1.105]                  | 2.791 <sup>**</sup><br>[0.122, 5.461]  | 0.594 <sup>**</sup><br>[0.121, 1.067]  | 0.383<br>[-0.869, 1.634]                  | 0.381<br>[-0.869, 1.631]                  |
| HH_ETH (ref: Ekoi): Ibibio                       | 1.109<br>[-0.248, 2.466]                 | 1.115<br>[-0.237, 2.468]                 | -0.264<br>[-1.248, 0.720]                 | 0.026<br>[-0.791, 0.844]                  | 0.257<br>[-0.618, 1.132]                  | 3.338 <sup>**</sup><br>[0.715, 5.961]  | 0.499 <sup>**</sup><br>[0.045, 0.952]  | -0.060<br>[-1.552, 1.433]                 | -0.068<br>[-1.560, 1.423]                 |
| HH_ETH (ref: Ekoi): Igala                        | 0.685<br>[-0.655, 2.024]                 | 0.694<br>[-0.645, 2.032]                 | -0.676<br>[-1.738, 0.385]                 | 0.647<br>[-0.253, 1.547]                  | -0.081<br>[-1.019, 0.857]                 | 3.470 <sup>***</sup><br>[1.030, 5.910] | 0.776 <sup>***</sup><br>[0.247, 1.305] | 0.000<br>[0.000, 0.000]                   | 0.000<br>[0.000, 0.000]                   |
| HH_ETH (ref: Ekoi): Igbo                         | 0.521 <sup>**</sup><br>[0.014, 1.028]    | 0.531 <sup>**</sup><br>[0.025, 1.038]    | -1.501 <sup>***</sup><br>[-2.066, -0.936] | 0.786 <sup>***</sup><br>[0.422, 1.150]    | 0.009<br>[-0.366, 0.384]                  | 4.918 <sup>***</sup><br>[2.881, 6.955] | 0.908 <sup>***</sup><br>[0.502, 1.315] | -0.024<br>[-0.650, 0.603]                 | -0.020<br>[-0.647, 0.606]                 |
| HH_ETH (ref: Ekoi): Ijaw / Izon                  | -0.625<br>[-2.141, 0.891]                | -0.638<br>[-2.160, 0.884]                | 0.804<br>[-0.205, 1.812]                  | -0.273<br>[-1.215, 0.668]                 | -1.925 <sup>**</sup><br>[-3.431, -0.419]  | 2.087 <sup>*</sup><br>[-0.170, 4.344]  | 0.107<br>[-0.322, 0.536]               | 0.497<br>[-0.809, 1.804]                  | 0.505<br>[-0.801, 1.811]                  |
| HH_ETH (ref: Ekoi): Kanuri / Beriberi            | 2.769 <sup>*</sup><br>[-0.166, 5.704]    | 2.780 <sup>*</sup><br>[-0.149, 5.710]    | 1.245<br>[-1.500, 3.990]                  | 0.000<br>[0.000, 0.000]                   | 1.406<br>[-1.171, 3.984]                  | 2.783<br>[-2.223, 7.790]               | 0.080<br>[-1.800, 1.960]               | 0.000<br>[0.000, 0.000]                   | 0.000<br>[0.000, 0.000]                   |
| HH_ETH (ref: Ekoi): Tiv                          | 1.769 <sup>*</sup><br>[-0.032, 3.569]    | 1.775 <sup>*</sup><br>[-0.025, 3.574]    | -0.566<br>[-1.650, 0.518]                 | -0.238<br>[-1.545, 1.068]                 | 0.530<br>[-0.532, 1.592]                  | 1.717<br>[-1.581, 5.014]               | 0.661 <sup>*</sup><br>[-0.123, 1.445]  | -0.015<br>[-2.100, 2.070]                 | -0.011<br>[-2.096, 2.074]                 |
| HH_ETH (ref: Ekoi): Yoruba                       | 0.289 <sup>*</sup><br>[-0.008, 0.587]    | 0.294 <sup>*</sup><br>[-0.004, 0.591]    | -0.244 <sup>*</sup><br>[-0.505, 0.016]    | -0.118<br>[-0.361, 0.126]                 | 0.341 <sup>***</sup><br>[0.102, 0.580]    | 5.612 <sup>***</sup><br>[3.766, 7.457] | 0.944 <sup>***</sup><br>[0.562, 1.325] | 0.438 <sup>**</sup><br>[0.030, 0.846]     | 0.440 <sup>**</sup><br>[0.032, 0.848]     |

|                                            |                               |                               |                               |                               |                               |                               |                               |                            |                            |
|--------------------------------------------|-------------------------------|-------------------------------|-------------------------------|-------------------------------|-------------------------------|-------------------------------|-------------------------------|----------------------------|----------------------------|
| HH_ETH (ref: Ekoi): Other                  | 0.000<br>[0.000, 0.000]       | 0.000<br>[0.000, 0.000]       | 0.000<br>[0.000, 0.000]       | 0.000<br>[0.000, 0.000]       | 0.000<br>[0.000, 0.000]       | 4.747***<br>[2.737, 6.757]    | 0.845***<br>[0.439, 1.250]    | 0.000<br>[0.000, 0.000]    | 0.000<br>[0.000, 0.000]    |
| HH_SIZ                                     | -0.011<br>[-0.058, 0.036]     | -0.011<br>[-0.059, 0.036]     | 0.031<br>[-0.010, 0.071]      | -0.020<br>[-0.056, 0.016]     | -0.008<br>[-0.042, 0.026]     | -0.136***<br>[-0.238, -0.035] | 0.002<br>[-0.014, 0.018]      | 0.499***<br>[0.399, 0.599] | 0.498***<br>[0.398, 0.598] |
| HH_WEA                                     | 0.142***<br>[0.090, 0.195]    | 0.142***<br>[0.089, 0.195]    | -0.154***<br>[-0.203, -0.105] | 0.066***<br>[0.024, 0.108]    | 0.059***<br>[0.019, 0.099]    | 0.298***<br>[0.193, 0.403]    | 0.040***<br>[0.022, 0.058]    | -0.012<br>[-0.088, 0.064]  | -0.011<br>[-0.087, 0.064]  |
| YEAR (ref: 2003): 2008                     | -0.257<br>[-0.891, 0.378]     | -0.252<br>[-0.889, 0.385]     | -0.027<br>[-0.516, 0.461]     | -0.356*<br>[-0.754, 0.041]    | 0.338<br>[-0.086, 0.763]      | -1.254**<br>[-2.220, -0.288]  | -0.181**<br>[-0.337, -0.024]  | -0.084<br>[-0.845, 0.677]  | -0.065<br>[-0.823, 0.694]  |
| YEAR (ref: 2003): 2013                     | -0.749**<br>[-1.390, -0.108]  | -0.726**<br>[-1.368, -0.084]  | 0.236<br>[-0.256, 0.728]      | -0.495**<br>[-0.891, -0.100]  | 0.258<br>[-0.165, 0.681]      | -0.078<br>[-1.055, 0.898]     | -0.261***<br>[-0.415, -0.107] | 0.140<br>[-0.628, 0.908]   | 0.174<br>[-0.584, 0.933]   |
| YEAR (ref: 2003): 2018                     | -0.694**<br>[-1.384, -0.003]  | -0.656*<br>[-1.349, 0.037]    | -0.072<br>[-0.595, 0.452]     | -0.716***<br>[-1.140, -0.292] | 0.709***<br>[0.265, 1.153]    | -3.705***<br>[-4.735, -2.674] | -0.425***<br>[-0.602, -0.247] | 0.159<br>[-0.675, 0.993]   | 0.149<br>[-0.684, 0.982]   |
| Constant                                   | -4.520***<br>[-5.602, -3.439] | -4.319***<br>[-5.373, -3.265] | 1.438***<br>[0.624, 2.252]    | -1.088***<br>[-1.786, -0.390] | -2.422***<br>[-3.131, -1.714] | 3.280***<br>[0.838, 5.722]    | 0.345<br>[-0.119, 0.808]      | 1.871***<br>[0.540, 3.202] | 1.849***<br>[0.520, 3.178] |
| Multilevel variance parameter: Level 1     | 0.255***<br>[0.097, 0.414]    | 0.257***<br>[0.098, 0.416]    | 0.479***<br>[0.264, 0.694]    | 0.357***<br>[0.207, 0.506]    | 0.543***<br>[0.342, 0.744]    | 0.483***<br>[0.285, 0.681]    | -1.886***<br>[-2.158, -1.614] | 0.027<br>[-0.106, 0.161]   | 0.026<br>[-0.107, 0.158]   |
| Multilevel variance parameter:<br>Residual |                               |                               |                               |                               |                               | 1.786***<br>[1.756, 1.816]    | 0.023<br>[-0.039, 0.086]      |                            |                            |
| Level 1 Observations (child)               | 3196                          | 3196                          | 4373                          | 4368                          | 4373                          | 4513                          | 4946                          | 6002                       | 6002                       |
| Level 2 Observations (LGA)                 | 121                           | 121                           | 121                           | 121                           | 121                           | 121                           | 121                           | 121                        | 121                        |
| Akaike Information Criterion               | 3244.008                      | 3246.792                      | 3803.166                      | 5074.963                      | 5338.697                      | 29126.36                      | 14392.094                     | 1819.029                   | 1817.343                   |
| Prob. > $\chi^2$                           | <0.001                        | <0.001                        | <0.001                        | <0.001                        | <0.001                        | <0.001                        | <0.001                        | <0.001                     | <0.001                     |

95% confidence intervals in brackets

\* p &lt; 0.10, \*\* p &lt; 0.05, \*\*\* p &lt; 0.01
