# Supplementary material for: Impact and effect mechanisms of mass campaigns in resource-constrained health systems: quasi-experimental evidence from polio eradication in Nigeria
Source: HighWire-hosted journal article supplement (doi:10.1136/bmjgh-2020-004248), 2021-03-01
Supplement: bmjgh-2020-004248supp009_data_supplement.pdf [file bmjgh-2020-004248supp009_data_supplement.pdf]

**Table 8: Intraclass correlation on LGA level in aggregate two-level models.**

| <b>Model</b>                                         | <b>Intraclass correlation</b> |
|------------------------------------------------------|-------------------------------|
| Routine childhood immunisation                       | 8.0%                          |
| Routine childhood immunisation (EXPxAGE interaction) | 8.0%                          |
| Place of delivery: home                              | 12.0%                         |
| Place of delivery: private facility                  | 18.1%                         |
| Place of delivery: public facility                   | 12.3%                         |
| No. of antenatal care visits                         | 21.8%                         |
| No. of tetanus toxoid injections                     | 4.6%                          |
| Child survival (exposure decomposition)              | 1.2%                          |
| Child survival (total exposure)                      | 1.2%                          |
| Routine childhood immunisation                       | 8.0%                          |

*Notes.* Intraclass correlations for main results reported in Section 4.2, based on two-level logistic regression with LGA random effect. LGA = local government area.
